# Supplementary material
Source: PubMed Central journal article supplement (PMC4851165)

**Supplemental information for:**

Calcium uncaging with visible light.

Hitesh K Agarwal<sup>1,2</sup>, Rado Janicek<sup>2,3</sup>, San-Hui Chi<sup>4</sup>, Joseph W Perry<sup>4</sup>, Ernst Niggli<sup>3\*</sup>, and Graham CR Ellis-Davies<sup>1\*</sup>.

<sup>1</sup>Department of Neuroscience,  
Mount Sinai School of Medicine,  
New York,  
NY 10029,  
USA.

<sup>3</sup>Department of Physiology,  
University of Bern,  
Bern CH 3012,  
Switzerland.

<sup>4</sup>School of Chemistry and Biochemistry,  
Center for Organic Photonics and Electronics,  
Georgia Institute of Technology,  
Atlanta,  
GA 30332,  
USA.

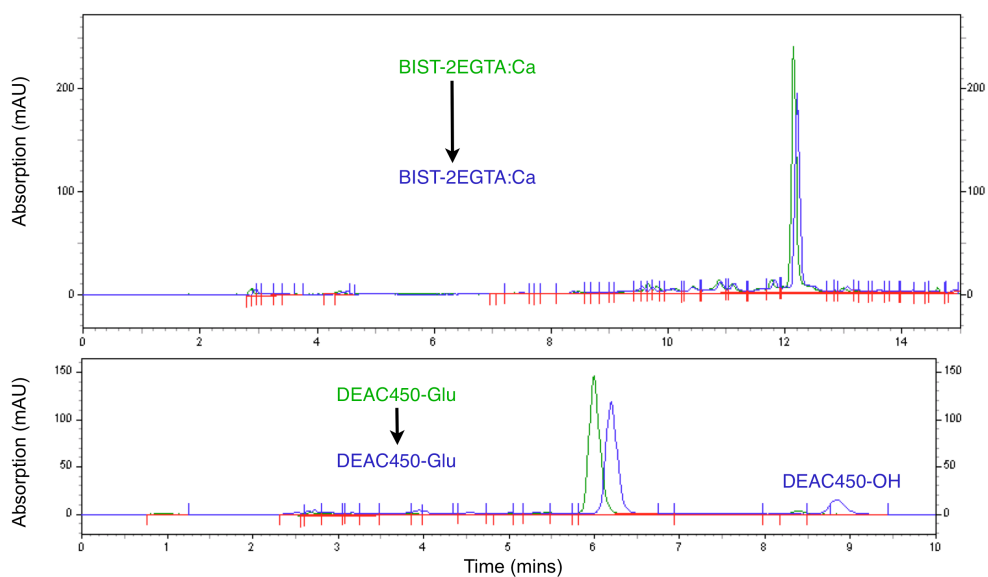

Supplemental Figure 1. Representative HPLC chromatograms from the photolysis of BIST-2EGTA and DEAC450-Glu. Each compound initially had the same absorption at 410 nm. A 410nm-laser was used for photolysis. Chromatograms were monitored at 410 nm.

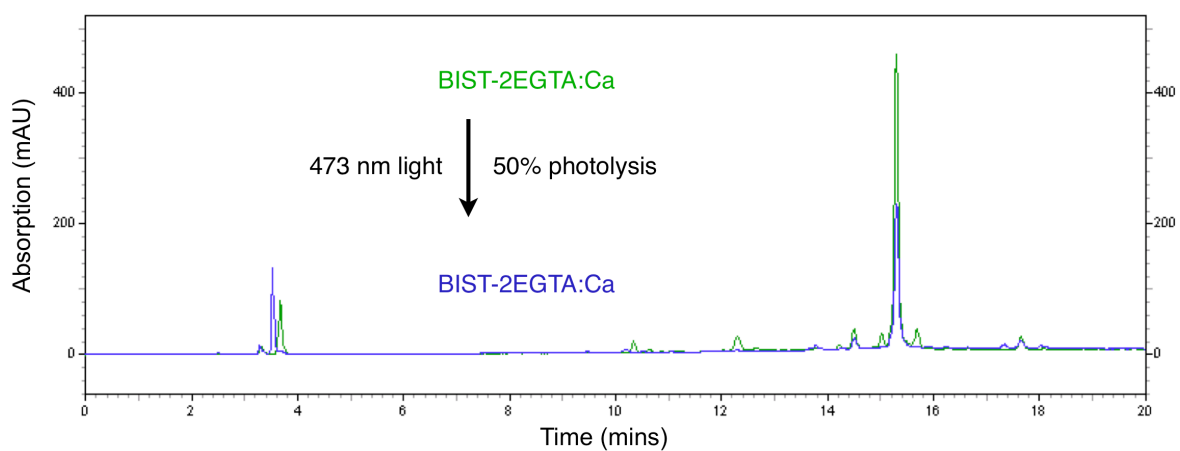

Supplemental Figure 2. HPLC chromatogram from the photolysis of BIST-2EGTA with visible light. Before photolysis a  $\text{Ca}^{2+}$ -selective electrode showed the free  $[\text{Ca}^{2+}]$  to be  $0.2 \mu\text{M}$ . After 50% photolysis of BIST-2EGTA the free  $[\text{Ca}^{2+}]$  increased to  $20 \mu\text{M}$ . Chromatograms were monitored at 473 nm.

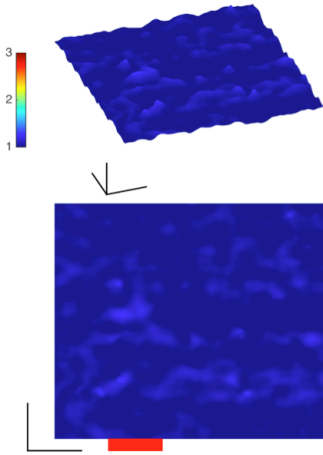

Supplemental Figure 3. Control experiment showing photolysis with EGTA in place of BIST-2EGTA does not release Ca.

Cardiac myocyte was patch-clamped as in Fig. 3 with the following solution (mM): 2 EGTA, 1.5  $\text{CaCl}_2$ , 0.1 X-rhod-5F, 1 GSH, 5  $\text{K}_2\text{ATP}$ , 10 HEPES, 20 TEA-Cl, 120 L-Aspartic acid, 120 CsOH, 8 NaCl, pH = 7.20. Point 2P irradiation at 810 nm with a much higher energy than used with BIST-2EGTA (~17 mW, 50 ms, red bar) in the middle of the scanning line did not produce any fluorescence signal.

Scale bars for units of  $1 F/F_0$ , 5  $\mu\text{m}$  and 50 ms.

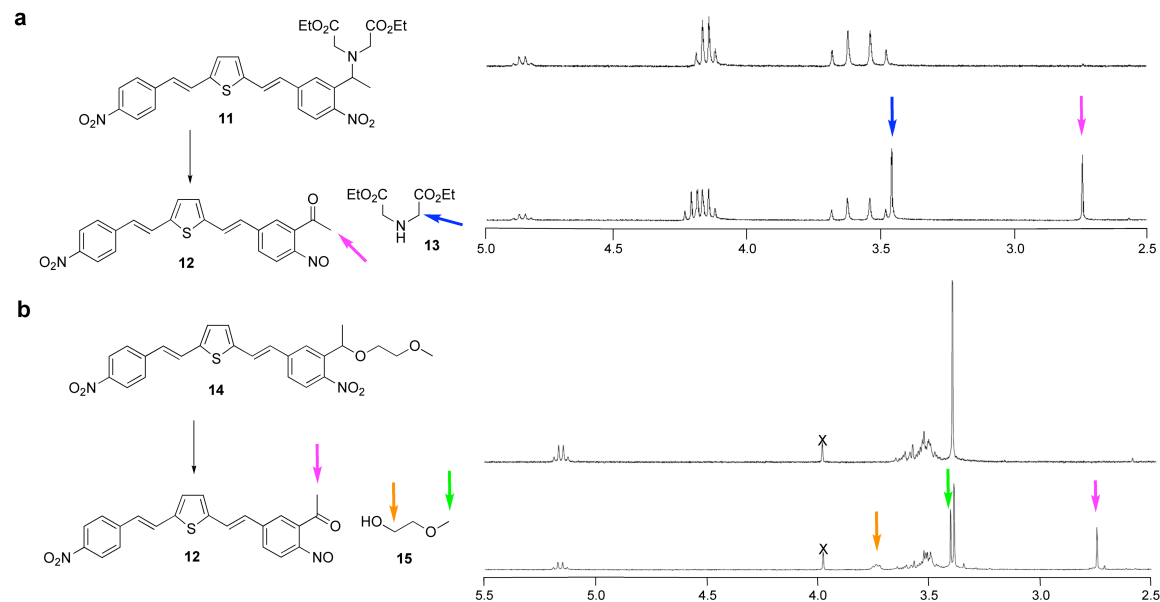

Supplemental Figure 4. NMR spectra of photolysis of a BIST-caged amine and alcohol.

**(a)** NMR analysis of the photolysis of BIST-caged amine **11** in  $\text{CDCl}_3$  showed the appearance of singlets corresponding to signals from the ketone **12** (pink arrow) and secondary amine **13** photoproducts (blue arrow).

**(b)** NMR analysis of the photolysis of BIST-caged alcohol **14** in  $\text{CDCl}_3$  showed the appearance of singlets corresponding to signals from the ketone **12** (pink arrow) and primary alcohol **15** photoproducts (green arrow). The alcohol methylene is indicated with the orange arrow. X indicates a small impurity.

## **BIST-2EGTA.**

### **2-(5-Bromo-2-nitrophenyl)oxirane (2).**

A suspension of 5-Bromo-2-nitrobenzaldehyde (10.0 g, 43.7 mmol) and cesium carbonate (21.5 g, 66.0 mmol) in tetrahydrofuran (200 mL) was heated at 60 °C for 10 min, then a suspension of carboxymethyl-4-cyanophenylmethylsulfonium trifluoromethanesulfonate (23.4 g, 65.5 mmol) in THF (150 mL) was slowly added to the reaction mixture over a period of 30 min and the reaction was heated for 2 h. The solution was cooled to room temperature, filtered through celite, concentrated and dried under reduced pressure and purified by flash chromatography (3% ethyl acetate in hexanes, v/v) to give 7.90 g (74%) of **2** as white crystals. Melting point: 77 °C. <sup>1</sup>H NMR: (300 MHz, CDCl<sub>3</sub>) δ 8.03 (d, *J* = 8.7 Hz, 1H, Ar H-3), 7.76 (s, 1H, Ar H-6), 7.60 (dd, *J* = 8.7 and 2.4 Hz, 1H, Ar H-4), 4.47 (dd, *J* = 3.9 and 2.4 Hz, 1H, H-1'), 3.31 (t, *J* = 5.1 Hz, 1H, H-2'), 2.68 (dd, *J* = 6.0 and 2.4 Hz, 1H, H-2''). <sup>13</sup>C NMR (75 MHz, CDCl<sub>3</sub>) δ 146.35, 136.51, 131.69, 130.12, 129.69, 126.13, 50.69, 50.34. HRMS (*m/z*) for C<sub>8</sub>H<sub>7</sub>BrNO<sub>3</sub>. Calcd. 243.9609. Found: *m/z* 243.9608 (M+H)<sup>+</sup>.

### **2-[2-(2-Hydroxy-2-(5-bromo-2-nitrophenyl)-ethoxy)ethoxy]ethanol (3).**

Sodium hydride (60% dispersion, 0.700 g, 17.1 mmol) was slowly added to diethylene glycol (100 mL) over 30 min. and then heated at 60 °C for 2 h. A warm solution of **2** (4.10 g, 16.8 mmol) in diethylene glycol (50 mL) was added to the reaction mixture, which was then heated at 60 °C for 20 h. Brine (250 mL) was added to the reaction mixture, which was then extracted with dichloromethane (5 x 100 mL). The organic layer was concentrated and dried under reduced pressure and the residue was purified by flash chromatography (3% methanol in dichloromethane, v/v) to give 3.00 g (80%) of **3** as white solid. Unreacted starting material (0.6 g) was also recovered from the reaction. <sup>1</sup>H NMR: (300 MHz, CDCl<sub>3</sub>) δ 8.08 (d, *J* = 2.1 Hz, 1H, Ar H-6), 7.85 (d, *J* = 8.7 Hz, 1H, Ar H-3), 7.55 (dd, *J* = 8.7 and 2.1 Hz, 1H, Ar H-4), 5.53 (dd, *J* = 2.7 and 8.0 Hz, 1H, benzylic-CH), 3.84 (dd, *J* = 2.8 and 10.3 Hz, 1H, -CH<sub>2</sub>-), 3.60-3.80 (m, 8H, -CH<sub>2</sub>-), 3.20 (s, 2H, 1'-OH and 6'-OH), 3.47 (dd, *J* = 8.1 and 10.3 Hz, 1H, -CH<sub>2</sub>-). <sup>13</sup>C NMR (75 MHz, CDCl<sub>3</sub>) δ 146.23, 138.17, 132.05, 131.38, 129.77, 125.87, 75.53, 72.59, 70.28, 70.18, 67.78, 61.59. HRMS (*m/z*) for C<sub>12</sub>H<sub>16</sub>BrNNaO<sub>6</sub>. Calcd. 374.0038. Found: *m/z* 374.0038 (M+Na)<sup>+</sup>.

### **2-[2-(2-(2-Bromoethoxy)ethoxy)-1-bromoethyl-4-bromonitrobenzene (4).**

To a cold solution of **3** (2.29 g, 6.54 mmol) and triphenylphosphene (6.90 g, 26.2 mmol) in anhydrous dichloromethane (80 mL) was added a solution of carbontetrabormide (9.50 g, 28.8 mmol) in dichloromethane (20 mL). The reaction mixture was stirred for 1 h at 4°C and then

stirred at room temperature for 2 h. The solvent was evaporated under reduced pressure and the residue was purified by flash chromatography (10% ethyl acetate in hexanes, v/v) to give 2.50 g (80%) of dibromide **4** as yellow oil.  $^1\text{H}$  NMR: (300 MHz,  $\text{CDCl}_3$ )  $\delta$  8.00 (d,  $J = 2.1$  Hz, 1H, Ar H-3), 7.50 (d,  $J = 8.7$  Hz, 1H, Ar H-6), 7.58 (dd,  $J = 8.7$  and 2.1 Hz, 1H, Ar H-5), 5.80 (t,  $J = 6.5$  Hz, 1H, benzylic-CH), 4.03 (d,  $J = 7.0$  Hz, 2H,  $-\text{CH}_2-$ ), 3.77 (t,  $J = 6.1$  Hz, 2H,  $-\text{CH}_2-$ ), 3.66-3.72 (m, 2H,  $-\text{CH}_2-$ ), 3.61-3.66 (m, 2H,  $-\text{CH}_2-$ ), 3.44 (t,  $J = 6.1$  Hz, 2H,  $-\text{CH}_2-$ ).  $^{13}\text{C}$  NMR (75 MHz,  $\text{CDCl}_3$ )  $\delta$  147.10, 135.42, 133.96, 132.20, 127.89, 125.85, 74.70, 71.12, 70.79, 70.44, 42.91, 30.46. HRMS (m/z) for  $\text{C}_{12}\text{H}_{14}\text{Br}_3\text{NO}_4\text{Na}$ . Calcd. 497.8350. Found: m/z 497.8351 (M+Na) $^+$ .

### **2-[2-(2-Azidoethoxy)ethoxy]-1-azidoethyl-4-bromonitrobenzene (5).**

Sodium Azide (2.4 g, 36.8 mmol) and sodium iodide (4.70 g, 31.2 mmol) and a solution of **4** (2.50 g, 5.2 mmol) in DMF (50 mL) were stirred at room temperature for 18h. The solvent was evaporated under reduced pressure and the residue was purified by flash chromatography (10% ethyl acetate in hexanes, v/v) to give 1.93 g (92%) of **5** as yellow oil.  $^1\text{H}$  NMR: (300 MHz,  $\text{CDCl}_3$ )  $\delta$  7.86-7.90 (m, 2H, Ar H-3, Ar H-6), 7.61 (dd,  $J = 8.7$  and 2.1 Hz, 1H, Ar H-5), 5.54 (dd,  $J = 3.8$  and 7.7 Hz, 1H, benzylic-CH), 3.85 (dd,  $J = 2.8$  and 10.4 Hz, 1H,  $-\text{CH}_2-$ ), 3.65-3.78 (m, 7H,  $-\text{CH}_2-$ ), 3.29 (t,  $J = 5.0$  Hz, 2H,  $-\text{CH}_2-$ ).  $^{13}\text{C}$  NMR (75 MHz,  $\text{CDCl}_3$ )  $\delta$  146.98, 134.35, 132.85, 132.42, 128.92, 126.51, 74.97, 71.23, 71.00, 70.45, 60.11, 51.06. HRMS (m/z) for  $\text{C}_{12}\text{H}_{14}\text{BrN}_7\text{O}_4\text{Na}$ . Calcd. 422.01888. Found: m/z 422.0188 (M+Na) $^+$ .

### **3-[2-(2-(2-Azidoethoxy)ethoxy)-1-azidoethyl]-4-nitrostyrene (6).**

Compound **5** (3.95 g, 9.9 mmol) and tetrakis(triphenylphosphine)palladium (0.250 g, 0.220 mmol) were dissolved in ethylene glycol dimethyl ether (90 mL). A solution of potassium carbonate (1.40 g, 10.0 mmol) in water (10 mL) was added to the reaction mixture followed by 2,4,6-trivinyl-boroxin pyridine complex (1.2 g, 5 mmol). The reaction mixture was heated at reflux temperature for 18 h. The solvents were evaporated under reduced pressure and the residue was purified by flash chromatography (20% ethyl acetate in hexanes, v/v) to give 2.50 g (73%) of **6** as yellow oil.  $^1\text{H}$  NMR: (300 MHz,  $\text{CDCl}_3$ )  $\delta$  7.98 (d,  $J = 8.5$  Hz, 1H, Ar H-5), 7.67 (d,  $J = 1.9$  Hz, 1H, Ar H-2), 7.48 (dd,  $J = 8.5$  and 1.9 Hz, 1H, Ar H-6), 6.76 (dd,  $J = 10.9$  and 6.7 Hz, 1H, vinyl-CH), 5.94 (d,  $J = 17.6$  Hz, 1H, vinyl-CH), 5.55 (dd,  $J = 3.5$  and 8.1 Hz, 1H, benzylic-CH), 5.52 (d,  $J = 10.9$  Hz, 1H, vinyl-CH), 3.87 (dd,  $J = 3.5$  and 10.5 Hz, 1H,  $-\text{CH}_2-$ ), 3.65-3.78 (m, 7H,  $-\text{CH}_2-$ ), 3.39 (t,  $J = 5.0$  Hz, 2H,  $-\text{CH}_2-$ ).  $^{13}\text{C}$  NMR (75 MHz,  $\text{CDCl}_3$ )  $\delta$  146.59, 142.78, 134.48, 132.49, 126.95, 125.99, 118.82, 76.58, 74.91, 70.75, 70.63, 70.06, 60.24, 50.70. HRMS (m/z) for  $\text{C}_{14}\text{H}_{17}\text{N}_7\text{O}_4\text{Na}$ . Calcd. 370.1240. Found: m/z 370.1241 (M+Na) $^+$ .

**2,5-Bis[3-{2-(2-(2-azidoethoxy)ethoxy)-1-azidoethyl}-4-nitrostyryl]thiophene (7).**

2,5-Dibromothiophene (0.250 mL, 2.20 mmol), **6** (2.30 g, 6.70 mmol), lithium chloride (600 mg, 14.0 mmol), sodium bicarbonate (1.50 g, 18.0 mmol), and tetrabutylammonium chloride (1.20 g, 4.40 mmol) were dissolved in DMF (50 mL) and purged with N<sub>2</sub> for 20 min. Palladium (II) acetate (0.200 g, 0.90 mmol) was added to the reaction mixture, which was then heated at 110 °C for 1 h. Water (100 mL) was added to the reaction mixture, which was then extracted with ethyl acetate (3 x 100 mL). The organic layer was separated, concentrated under reduced pressure and the residue was purified by flash chromatography (30% ethyl acetate in hexanes, v/v) to give 1.20 g (71%) of **7** as amorphous red solid. <sup>1</sup>H NMR: (300 MHz, CDCl<sub>3</sub>) δ 8.00 (d, *J* = 8.5 Hz, 2H, Ar H-5), 7.72 (s, 2H, Ar H-2), 7.50 (d, *J* = 8.5 Hz, 2H, Ar H-6), 7.30 (d, *J* = 16 Hz, 2H, vinyl CH), 7.10 (s, 2H, thiophene-CH), 6.90 (d, *J* = 16 Hz, 2H, vinyl-CH), 5.62 (dd, *J* = 3.3 and 7.9 Hz, 2H, benzylic-CH), 3.90 (dd, *J* = 3.4 and 10.5 Hz, 2H, -CH<sub>2</sub>-), 3.60-3.82 (m, 14H, -CH<sub>2</sub>-), 3.38 (t, *J* = 4.9 Hz, 4H, -CH<sub>2</sub>-). <sup>13</sup>C NMR (75 MHz, CDCl<sub>3</sub>) δ 145.95, 142.18, 142.06, 132.87, 129.23, 126.80, 126.07, 125.92, 125.85, 125.65, 74.93, 70.71, 70.62, 70.03, 60.31, 50.67. HRMS (*m/z*) for C<sub>32</sub>H<sub>34</sub>N<sub>14</sub>O<sub>8</sub>SNa. Calcd. 797.2302. Found: *m/z* 797.2306 (M+Na)<sup>+</sup>.

**2,5-Bis[3-{2-(2-(2-(*N,N*-diethoxycarboxyl)aminoethoxy)ethoxy)-1-(*N,N*-dicarboxyl)aminoethyl}-4-nitrostyryl]thiophene (8).**

To a solution of **7** (1.05 g, 1.36 mmol) in THF (50 mL) and water (1 mL) was added triphenylphosphene (14.3 g, 54.5 mmol), and the reaction mixture was stirred at room temperature for 2 h. Sodium hydroxide solution (2.5 M, 20 mL) was added to the reaction mixture, which was then stirred at room temperature for 18 h. Water (100 mL) was added and the reaction mixture was extracted with dichloromethane (3 x 100 mL). The organic layer was separated and extracted with acidic water (3 x 100 mL 0.1% TFA). The aqueous layer was separated and washed with dichloromethane (100 mL) and dried by lyophilization to give 0.630 g (70%) of tetraamine intermediate, which was used in the next synthetic step. A small amount of this material was purified by reverse phase HPLC using 35% acetonitrile in water (0.1% TFA) on an Altima C<sub>18</sub> column to yield an analytically pure sample for spectroscopic characterization. <sup>1</sup>H NMR: (300 MHz, CD<sub>3</sub>OD) δ 8.14 (d, *J* = 8.6 Hz, 2H, Ar H-5), 8.00 (s, 2H, Ar H -2), 7.81 (d, *J* = 8.6 Hz, 2H, Ar H-6), 7.66 (d, *J* = 16 Hz, 2H, vinyl CH), 7.26 (s, 2H, thiophene-CH), 7.09 (d, *J* = 16 Hz, 2H, vinyl-CH), 5.23 (dd, *J* = 4.9 and 7.0 Hz, 2H, benzylic-CH), 4.0-4.1 (m, 4H, -CH<sub>2</sub>-), 3.67-3.87 (m, 12H, -CH<sub>2</sub>-), 3.13 (t, *J* = 5.0 Hz, 4H, -CH<sub>2</sub>-). <sup>13</sup>C NMR (75 MHz, CD<sub>3</sub>OD) δ 146.79, 141.89, 141.76, 132.11, 129.74, 127.16, 126.24, 125.88, 125.59, 117.90, 71.78, 69.78, 69.28, 66.62, 49.22, 38.50. HRMS (*m/z*) for C<sub>32</sub>H<sub>43</sub>N<sub>6</sub>O<sub>8</sub>S. Calcd. 671.2863. Found: *m/z* 671.2852 (M+H)<sup>+</sup>.



The tetraamine (0.500 g, 0.750 mmol) and pentamethylpiperidine (1.35 mL, 7.50 mmol) were dissolved in anhydrous acetonitrile (25 mL) and sodium iodide (11.5 g, 75.0 mmol) was added to the solution, followed by ethyl bromoacetate (8.4 mL, 75 mmol) in four equal portions to the reaction mixture over a period of 72 h. During this period the reaction mixture was heated at 60 °C. After completion of the reaction, the solvent was evaporated and the residue was purified by flash chromatography (5% methanol in dichloromethane, v/v) to give an amorphous red solid. This residue was dissolved in methanol and purified by reverse phase HPLC using 75% acetonitrile in water (0.1 % TFA). The solvents were removed under reduced pressure to give 0.450 g (44%) of **8**. <sup>1</sup>H NMR: (300 MHz, CDCl<sub>3</sub>) δ 8.13 (d, *J* = 1.6 Hz, 2H, Ar H-2), 7.82 (d, *J* = 8.5 Hz, 2H, Ar H-5), 7.43 (dd, *J* = 1.6 and 8.5 Hz, 2H, Ar H-6), 7.36 (d, *J* = 16 Hz, 2H, vinyl CH), 7.09 (s, 2H, thiophene-CH), 6.90 (d, *J* = 16 Hz, 2H, vinyl-CH), 5.23 (dd, *J* = 3.2 and 6.6 Hz, 2H, benzylic-CH), 4.05-4.23 (m, 16H, -CH<sub>2</sub>-), 3.89 (s, 8H, -CH<sub>2</sub>-), 3.41-3.85 (m, 24H, -CH<sub>2</sub>-), 3.25 (t, *J* = 4.5 Hz, 4H, -CH<sub>2</sub>-), 1.20-1.30 (m, 24H, -CH<sub>3</sub>). <sup>13</sup>C NMR (75 MHz, CDCl<sub>3</sub>) δ 171.31, 168.43, 148.01, 142.08, 141.56, 136.51, 128.87, 127.77, 126.46, 125.58, 125.51, 125.02, 73.25, 69.99, 68.33, 61.29, 60.49, 59.09, 54.50, 53.69, 53.13, 14.27, 14.13. HRMS (*m/z*) for C<sub>64</sub>H<sub>91</sub>N<sub>6</sub>O<sub>24</sub>S. Calcd. 1359.5805. Found: *m/z* 1359.5804 (M+H)<sup>+</sup>.

**2,5-Bis[3-{2-(2-(2-(*N,N*-dicarbonyl)aminoethoxy)ethoxy)-1-(*N,N*-diethoxycarbonyl)aminoethyl}-4-nitrostyryl]thiophene (**1**).**

Compound **7** (0.370 g, 0.270 mmol) was dissolved in methanol (25 mL) and potassium hydroxide (1 M, 0.82 mL) was added to the solution. The reaction mixture was stirred at room temperature for 18 h. The solvent was evaporated and residue was purified by reverse phase HPLC using 35% acetonitrile in water (0.1 % TFA) as the solvent system. Solvents were removed by lyophilization to give 0.162 g (53%) of **1** as an amorphous red solid. <sup>1</sup>H NMR: (300 MHz, D<sub>2</sub>O) δ 7.97 (s, 2H, Ar H-2), 7.75 (d, *J* = 8.5 Hz, 2H, Ar H-5), 7.36-7.49 (m, 4H, Ar H-6 and vinyl CH), 7.12 (s, 2H, thiophene-CH), 6.96 (d, *J* = 16 Hz, 2H, vinyl-CH), 4.97 (t, *J* = 5.4 Hz, 2H, benzylic-CH), 3.67-3.87 (m, 4H, -CH<sub>2</sub>-), 3.36-3.51 (m, 12H, -CH<sub>2</sub>-), 3.19-3.22 (m, 16H, -CH<sub>2</sub>-), 2.74-2.87 (m, 4H, -CH<sub>2</sub>-). <sup>13</sup>C NMR (75 MHz, CDCl<sub>3</sub>) δ 172.76, 167.75, 148.09, 141.93, 141.17, 136.11, 129.67, 127.69, 126.63, 126.05, 125.64, 125.03, 72.56, 72.46, 69.50, 69.37, 65.55, 63.16, 58.69, 55.02, 52.85. HRMS (*m/z*) for C<sub>48</sub>H<sub>59</sub>N<sub>6</sub>O<sub>24</sub>S. Calcd. 1135.3301. Found: *m/z* 1135.3297 (M+H)<sup>+</sup>.

### Synthesis of compound 9.

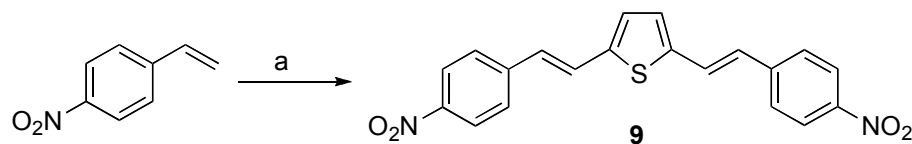

Reagents and conditions: (a) 2,5-Dibromothiophene, Pd(OAc)<sub>2</sub>, LiCl, TBACl, NaHCO<sub>3</sub>, TPGS-750-M, DMF. Note this is a known compound.

### 2,5-Bis-4-nitrostyrylthiophene (9).

2,5-Dibromothiophene (50.0 mg, 0.207 mmol), 4-nitrostyrene (123 mg, 0.825 mmol), lithium chloride (100 mg, 2.38 mmol), sodium bicarbonate (200 mg, 2.38 mmol), and tetrabutylammonium chloride (120 mg, 0.43 mmol) were dissolved in DMF (5 mL) and purged with N<sub>2</sub> for 20 min. TPGS-750M (DL- $\alpha$ -Tocopherol methoxypolyethylene glycol succinate solution, 5 wt % in water, 200  $\mu$ L) and palladium (II) acetate (10.0 mg, 0.045 mmol) were added to the reaction mixture, which was then heated at 110 °C for 1 h. Water (100 mL) was added to the reaction mixture, which was extracted with ethyl acetate (3 x 100 mL). The organic layer was separated, concentrated under reduced pressure and the residue was purified by flash chromatography (50% ethyl acetate and 10% THF in hexanes, v/v) to give 50.0 mg (64%) of **9** as an amorphous red solid. <sup>1</sup>H NMR: (300 MHz, DMSO-d<sub>6</sub>)  $\delta$  8.23 (d, *J* = 8.6 Hz, 4H, Ar H-3,5), 7.86 (d, *J* = 8.6 Hz, 4H, Ar H-2,6), 7.76 (d, *J* = 16.2 Hz, 2H, vinyl CH), 7.34 (s, 2H, thiophene-CH), 7.14 (d, *J* = 16.2 Hz, 2H, vinyl-CH). <sup>13</sup>C NMR (75 MHz, DMSO-d<sub>6</sub>)  $\delta$  145.88, 143.22, 141.99, 129.78, 127.01, 126.24, 126.16, 123.84.

### Synthesis of compound 10.

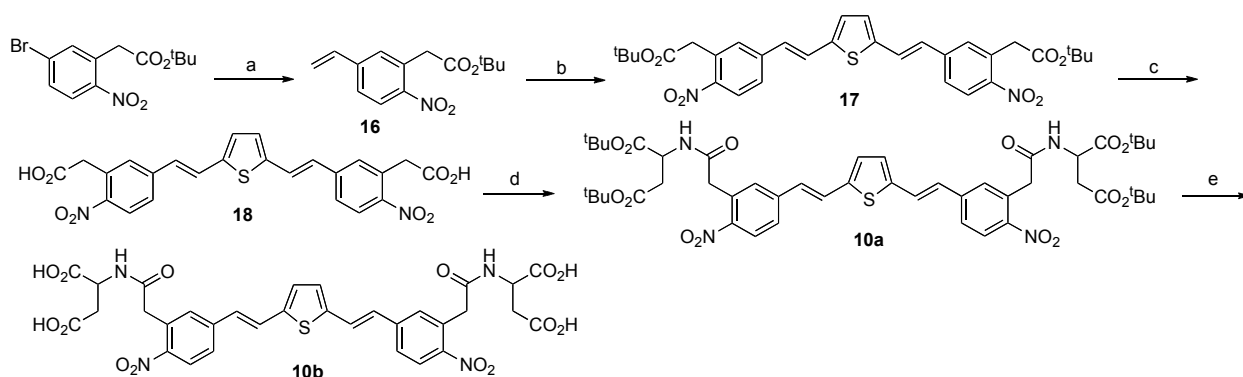

Reagents and conditions: (a) Pd(PPh<sub>3</sub>)<sub>4</sub>, 2,4,6-trivinyl-boroxin pyridine complex, K<sub>2</sub>CO<sub>3</sub>, DME, H<sub>2</sub>O; (b) 2,5-dibromothiophene, Pd(OAc)<sub>2</sub>, LiCl, TBACl, NaHCO<sub>3</sub>, TPGS-750-M, DMF; (c) DCM, TFA; (d) L-aspartic acid di-*tert*-butyl ester hydrochloride, EDC hydrochloride, THF; (e) DCM, TFA.

### *tert*-Butyl 2-(2-nitro-5-vinylphenyl)acetate (16).

*tert*-Butyl 2-(5-bromo-2-nitrophenyl)acetate (330 mg, 1 mmol) and tetrakis(triphenylphosphine)palladium (24.0 mg, 0.021 mmol) were dissolved in ethylene glycol dimethyl ether (10 mL) and a solution of potassium carbonate (145 mg, 1 mmol) in water (3 mL) was added to the reaction mixture followed by 2,4,6-trivinyl-boroxin pyridine complex (125 mg, 0.52 mmol). The reaction mixture was heated at reflux temperature for 18 h and then the solvents were evaporated under reduced pressure. The residue was purified by flash chromatography (10% ethyl acetate in hexanes, v/v) to give 242 mg (88%) of **16** as colorless oil. <sup>1</sup>H NMR: (300 MHz, CDCl<sub>3</sub>) δ 8.01 (d, *J* = 8.5 Hz, 1H, Ar H-5), 7.39 (dd, *J* = 8.5 and 1.9 Hz, 1H, Ar H-2), 7.27 (d, *J* = 1.9 Hz, 1H, Ar H-6), 6.67 (dd, *J* = 10.9 and 17.5 Hz, 1H, vinyl-CH), 5.85 (d, *J* = 17.5 Hz, 1H, vinyl-CH), 5.42 (dd, *J* = 10.9 Hz, 1H, vinyl-CH), 3.90 (s, 2H, -CH<sub>2</sub>-), 1.41 (s, 9H, -CH<sub>3</sub>). <sup>13</sup>C NMR (75 MHz, CDCl<sub>3</sub>) δ 168.74, 147.27, 142.34, 134.37, 130.81, 130.62, 125.39, 125.32, 118.18, 81.48, 41.12, 27.83. HRMS (*m/z*) for C<sub>14</sub>H<sub>17</sub>NO<sub>4</sub>Na. Calcd. 286.1055. Found: *m/z* 286.1050 (M+Na)<sup>+</sup>.

**Di-*tert*-butyl 2,2'-(((1E,1'E)-thiophene-2,5-diylbis(ethene-2,1-diyl))bis(6-nitro-3,1-phenylene))diacetate (17).**

2,5-Dibromothiophene (73.0 mg, 0.300 mmol), **16** (240 mg, 0.910 mmol), lithium chloride (42.0 mg, 1.00 mmol), sodium bicarbonate (84.0 mg, 1.00 mmol), and tetrabutylammonium chloride (140 mg, 0.500 mmol) were dissolved in DMF (5 mL) and purged with N<sub>2</sub> for 20 min. TPGS-750-M (5 wt % in water, 200 μL) and palladium (II) acetate (15.0 mg, 0.070 mmol) were added to the reaction mixture, which was then heated at 110 °C for 1 h. Water (100 mL) was added to the reaction mixture, which was extracted with ethyl acetate (3 x 100 mL). The organic layer was separated and concentrated under reduced pressure. The residue was purified by flash chromatography (20% ethyl acetate in hexanes, v/v) to give 140 mg (70%) of **17** as an amorphous red solid. <sup>1</sup>H NMR: (300 MHz, CDCl<sub>3</sub>) δ 8.08 (d, *J* = 8.6 Hz, 2H, Ar H-5), 7.46 (dd, *J* = 1.6 and 8.6 Hz, 2H, Ar H-4), 7.34 (d, *J* = 1.6 Hz), 7.27 (d, *J* = 16.0 Hz, 2H, vinyl CH), 7.03 (s, 2H, thiophene-CH), 6.84 (d, *J* = 16.0 Hz, 2H, vinyl-CH), 3.95 (s, 4H, -CH<sub>2</sub>-), 1.45 (s, 18H, -CH<sub>3</sub>). <sup>13</sup>C NMR (75 MHz, CDCl<sub>3</sub>) δ 168.91, 146.90, 142.00, 141.88, 131.10, 130.87, 129.00, 126.07, 125.85, 125.54, 125.35, 81.72, 41.40, 27.99. HRMS (*m/z*) for C<sub>32</sub>H<sub>34</sub>N<sub>2</sub>O<sub>8</sub>SNa. Calcd. 629.1934. Found: *m/z* 629.1917 (M+H)<sup>+</sup>.

**2,2'-(((1E,1'E)-Thiophene-2,5-diylbis(ethene-2,1-diyl))bis(6-nitro-3,1-phenylene))diacetic acid (18).**

Compound **17** (140 mg, 0.23 mmol) was dissolved in dichloromethane (5 mL) and TFA (5 mL) was added to the solution. The reaction mixture was stirred at room temperature for 1 h. The

solvents were removed using nitrogen gas to give 113 mg (96 %) of **18** as an amorphous red solid. <sup>1</sup>H NMR: (300 MHz, DMSO-d<sub>6</sub>) δ 8.11 (d, *J* = 8.5 Hz, 2H, Ar H-5), 7.66-7.80 (m, 6H, Ar H, vinyl-CH), 7.32 (s, 2H, thiophene-CH), 7.06 (d, *J* = 16.0 Hz, 2H, vinyl-CH), 4.01 (s, 4H, -CH<sub>2</sub>-). <sup>13</sup>C NMR (75 MHz, DMSO-d<sub>6</sub>) δ 171.08, 146.63, 141.95, 141.90, 131.29, 131.06, 129.72, 126.06, 125.98, 125.87, 125.55. HRMS (*m/z*) for C<sub>24</sub>H<sub>19</sub>N<sub>2</sub>O<sub>8</sub>S. Calcd. 495.0862. Found: *m/z* 495.0847 (M+H)<sup>+</sup>.

**Tetra-tert-butyl 2,2'-((2,2'-(((1E,1'E)-thiophene-2,5-diylbis(ethene-2,1-diyl))bis(6-nitro-3,1-phenylene))bis(acetyl))bis(azanediy))disuccinate 10a.**

Compound **18** (78 mg, 0.16 mmol), L-aspartic acid di-*tert*-butyl ester hydrochloride (158 mg, 0.800 mmol) and EDC hydrochloride (158 mg, 0.800 mmol) were dissolved in THF (10 mL) and then stirred at room temperature for 20 h. 1N HCl (100 mL) was added to the reaction mixture, which was extracted with ethyl acetate (100 mL). The organic layer was separated and washed with saturated sodium bicarbonate solution (2 x 100 mL). The organic layer was concentrated under reduced pressure and the residue was purified by flash chromatography (50% ethyl acetate in hexanes, *v/v*) to give 133 mg (89%) of **10a** as an amorphous red solid. <sup>1</sup>H NMR: (300 MHz, CDCl<sub>3</sub>) δ 8.04 (d, *J* = 8.4 Hz, 2H, Ar H-5), 7.40-7.50 (m, 4H, Ar H-2 and H-4), 7.28 (d, *J* = 16.0 Hz, 2H, vinyl-CH), 7.03 (s, 2H, thiophene-CH), 6.77-6.92 (m, 4H, -CONH-, vinyl-CH), 4.63-4.75 (m, 2H, -CH-), 3.92 (dd, *J* = 15.3 and 26.8 Hz, 4H, -CH<sub>2</sub>-), 2.88 (dd, *J* = 4.3 and 17.2 Hz, 2H, -CH<sub>2</sub>-), 2.73 (dd, *J* = 4.3 and 17.2 Hz, 2H, -CH<sub>2</sub>-), 1.42 (s, 36H, -CH<sub>3</sub>). <sup>13</sup>C NMR (75 MHz, CDCl<sub>3</sub>) δ 170.02, 169.44, 168.39, 146.84, 142.07, 142.03, 130.92, 130.85, 129.06, 125.98, 125.86, 125.73, 125.51, 82.22, 81.45, 49.33, 41.26, 37.35, 28.02, 27.89. HRMS (*m/z*) for C<sub>48</sub>H<sub>60</sub>N<sub>4</sub>O<sub>14</sub>SNa. Calcd. 971.3724. Found: *m/z* 971.3721 (M+Na)<sup>+</sup>.

**2,2'-((2,2'-(((1E,1'E)-thiophene-2,5-diylbis(ethene-2,1-diyl))bis(6-nitro-3,1-phenylene))bis(acetyl))bis(azanediy))disuccinic acid (10b).**

Compound **10a** (103 mg, 0.11 mmol) was dissolved in dichloromethane (5 mL), TFA (5 mL) was added to the solution, which was then stirred at room temperature for 1 h. The solvents were removed with nitrogen gas to give 78.0 mg (99 %) of **10b** as an amorphous red solid. <sup>1</sup>H NMR: (300 MHz, CD<sub>3</sub>OD) δ 8.04 (d, *J* = 9.0 Hz, 2H, Ar H-5), 7.56-7.66 (m, 4H, Ar H-2 and H-4), 7.52 (d, *J* = 16.1 Hz, 2H, vinyl-CH), 7.15 (s, 2H, thiophene-CH), 7.00 (d, *J* = 16.1 Hz, 2H, vinyl-CH), 4.75 (t, *J* = 5.5 Hz, 2H, -CH-), 4.00 (dd, *J* = 16.3 and 23.3 Hz, 4H, -CH<sub>2</sub>-), 2.84 (d, *J* = 4.4 Hz, 4H, -CH<sub>2</sub>-). <sup>13</sup>C NMR (75 MHz, CD<sub>3</sub>OD) δ 172.07, 171.41, 168.24, 147.17, 141.17, 141.88, 141.44, 131.52, 130.69, 129.60, 126.02, 125.82, 125.53, 125.26, 48.75, 36.12. HRMS (*m/z*) for C<sub>32</sub>H<sub>29</sub>N<sub>4</sub>O<sub>14</sub>S. Calcd. 725.1401. Found: *m/z* 725.1395 (M+H)<sup>+</sup>.

## Synthesis of compound 11.

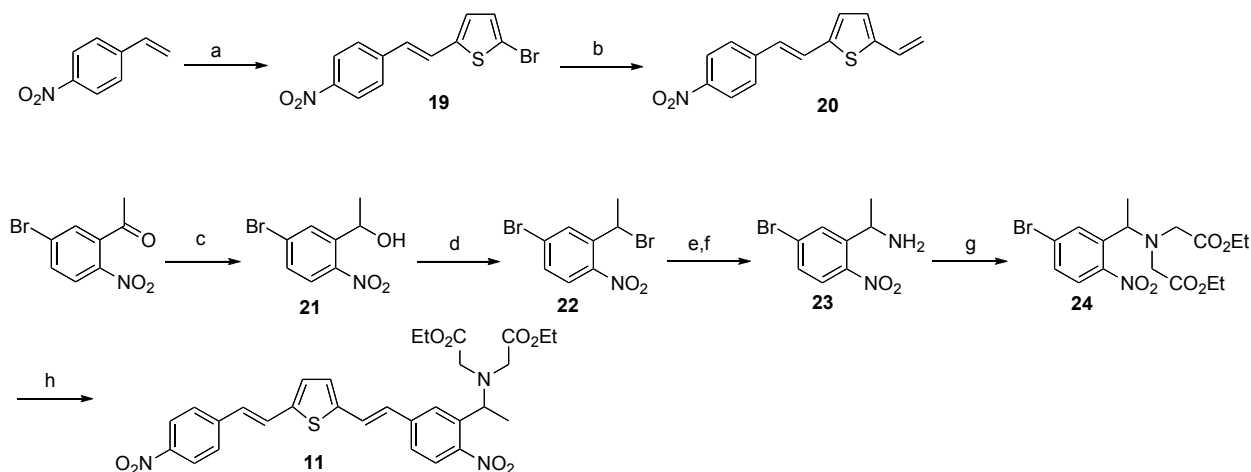

Reagents and conditions: (a) 2-Bromothiophene, benzoquinone, acetic acid, Pd(OAc)<sub>2</sub>; (b) Pd(PPh<sub>3</sub>)<sub>4</sub>, 2,4,6-trivinyl-boroxin pyridine complex, K<sub>2</sub>CO<sub>3</sub>, DME, H<sub>2</sub>O. (c) NaBH<sub>4</sub>, THF, H<sub>2</sub>O, 10 min, RT; (d) CBr<sub>4</sub>, PPh<sub>3</sub>, DCM, 3 h, RT; (e) potassium phthalimide, DMF, 3h, 60 °C; (f) hydrazine hydrate, MeOH, 2h, RT; (g) BrCH<sub>2</sub>COOEt, K<sub>2</sub>CO<sub>3</sub>, pentamethyl piperidine, acetonitrile, 48 h, 65 °C; (h) 9, Pd(OAc)<sub>2</sub>, LiCl, TBACl, NaHCO<sub>3</sub>, TPGS750-M, DMF, 1 h, 110 °C.

### 2-(4-Nitrostyryl)-5-bromothiophene (19).

4-Nitrostyrene (2.1 g, 14.1 mmol) and 2-bromothiophene (2.70 mL, 28.2 mmol) were dissolved in DMSO (30 mL) and acetic acid (30 mL), then benzophenone and palladium(II) acetate (500 mg, 2.24 mmol) were added and the solution stirred at room temperature for 72 h. Sodium hydroxide (5 N, 50 mL) was added to the reaction mixture, which was then extracted with ethyl acetate (3 x 50 mL). The organic layer was separated and the solvents removed under reduced pressure. The residue was purified by column chromatography (silica, 20% ethyl acetate in hexanes, v/v) to give (3.55 g (80%)) of **19** as an amorphous red solid. <sup>1</sup>H NMR: (300 MHz, CDCl<sub>3</sub>) δ 8.18 (d, *J* = 8.9 Hz, 2H, Ar H), 7.55 (d, *J* = 8.9 Hz, 2H, Ar H), 7.25 (d, *J* = 16 Hz, 1H, vinyl CH), 6.99 (d, 1H, *J* = 3.8 Hz, thiophene-CH), 6.89 (d, 1H, *J* = 3.8 Hz, thiophene-CH), 6.81 (d, *J* = 16 Hz, 1H, vinyl-CH). <sup>13</sup>C NMR (75 MHz, CDCl<sub>3</sub>) δ 146.63, 143.12, 142.97, 130.73, 128.21, 126.53, 125.89, 125.33, 124.12, 113.25. HRMS (*m/z*) for C<sub>12</sub>H<sub>9</sub>BrNO<sub>2</sub>S. Calcd. 309.9537. Found: *m/z* 309.9532 (M+H)<sup>+</sup>.

### 2-(4-Nitrostyryl)-5-vinylthiophene (20).

Compound **19** (3.2 g, 10.2 mmol) and tetrakis(triphenylphosphine)palladium (235 mg, 0.2 mmol) were dissolved in ethylene glycol dimethyl ether (40 mL). A solution of potassium carbonate (1.40 g, 10.2 mmol) in water (10 mL) was added to the reaction mixture followed by 2,4,6-trivinyl-boroxin pyridine complex (1.2 g, 5 mmol). The reaction mixture was heated at

reflux temperature for 20 h. The solvents were evaporated under reduced pressure and the residue was purified by column chromatography (silica, 20% ethyl acetate in hexanes, v/v) to give 2.35 g (88%) of **20** as an amorphous red solid.  $^1\text{H NMR}$ : (300 MHz,  $\text{CDCl}_3$ )  $\delta$  8.19 (d,  $J = 8.9$  Hz, 2H, Ar H), 7.55 (d,  $J = 8.9$  Hz, 2H, Ar H), 7.31 (d,  $J = 16$  Hz, 1H, vinyl CH), 7.02 (d, 1H,  $J = 3.8$  Hz, thiophene-CH), 6.89 (d, 1H,  $J = 3.8$  Hz, thiophene-CH), 6.88 (d,  $J = 16$  Hz, 1H, vinyl-CH), 6.78 (dd,  $J = 11.0$  and 17.3 Hz, 1H, vinyl-CH) 5.60 (d,  $J = 17.3$  Hz, 1H, vinyl-CH), 5.22 (d,  $J = 11.0$  Hz, 1H, vinyl-CH).  $^{13}\text{C NMR}$  (75 MHz,  $\text{CDCl}_3$ )  $\delta$  146.72, 143.91, 143.63, 140.70, 129.94, 129.08, 127.11, 126.74, 126.39, 125.87, 124.38, 114.78. HRMS ( $m/z$ ) for  $\text{C}_{14}\text{H}_{12}\text{NO}_2\text{S}$ . Calcd. 258.0589. Found:  $m/z$  258.0584 ( $\text{M}+\text{H}$ ) $^+$ .

#### **4-Bromo-2-(1-bromoethyl)nitrobenzene (22).**

The known compound **21** was synthesized by reacting 1-(5-bromo-2-nitrophenyl)ethanone with sodium borohydride in THF. Then to a cold solution of **21** (1.00 g, 4.00 mmol) and triphenyl phosphene (2.20 g, 8.10 mmol) in anhydrous dichloromethane (20 mL) was added a solution of carbon tetrabromide (3.00 g, 8.50 mmol) in dichloromethane (10 mL). The reaction mixture was stirred for 1 h at 4°C, and the stirred at room temperature for 2 h. The solvents were evaporated under reduced pressure and the residue was purified by column chromatography (silica, 5% ethyl acetate in hexanes, v/v) to give 1.20 g (96%) of **22** as colorless oil.  $^1\text{H NMR}$ : (300 MHz,  $\text{CDCl}_3$ )  $\delta$  7.99 (d,  $J = 2.1$  Hz, 1H, Ar H-6), 7.73 (d,  $J = 8.7$  Hz, 1H, Ar H-3), 7.56 (dd,  $J = 2.1$  and 8.7 Hz, 1H, Ar H-5), 5.77 (q,  $J = 6.8$  Hz, 1H, benzylic-CH), 2.07 (d,  $J = 6.8$  Hz, 3H, CH- $\text{CH}_3$ ).  $^{13}\text{C NMR}$  (75 MHz,  $\text{CDCl}_3$ )  $\delta$  145.97, 139.57, 132.97, 131.98, 128.16, 125.85, 40.76, 27.05.

#### **1-(5-Bromo-2-nitrophenyl)ethanamine (23).**

A solution of **22** (1.1 g, 3.6 mmol) and potassium phthalimide (1.00 g, 5.40 mmol) in DMF (10 mL) was heated for 3 h at 60 °C. The NaOH solution (0.1 N, 50 mL) was added to the reaction mixture, which was then extracted with DCM (20 mL  $\times$  3). The organic layer was separated and the solvents removed under reduced pressure. The residue was dissolved in methanol (20 mL) and reacted with hydrazine hydrate (230  $\mu\text{L}$ , 7.3 mmol) for 2 h at room temperature. Solvent was removed under reduced pressure and residue was redissolved in water (20 mL) and concentrated HCl (10 mL) and the solution was heated for 3 h at 60 °C. Precipitates were removed and the pH of the solution was adjusted to 8 with NaOH and extracted with ethyl acetate (3  $\times$  20 mL). The organic layer was separated and the solvents removed under reduced pressure to give 0.680 g (96%) of **23** as an amorphous white solid.  $^1\text{H NMR}$ : (300 MHz,  $\text{CDCl}_3$ )  $\delta$  7.99 (d,  $J = 2.1$  Hz, 1H, Ar H-3), 7.68 (d,  $J = 8.6$  Hz, 1H, Ar H-6), 7.49 (dd,  $J = 2.1$  and 8.6 Hz, 1H, Ar H-4), 4.56-4.70 (m, 1H, benzylic-CH), 1.44 (d,  $J = 6.5$  Hz, 3H, CH- $\text{CH}_3$ ).  $^{13}\text{C NMR}$  (75 MHz,

$\text{CDCl}_3$ )  $\delta$  147.34, 130.91, 130.58, 128.1, 125.60, 45.98, 24.85. HRMS ( $m/z$ ) for  $\text{C}_8\text{H}_{10}\text{BrN}_2\text{O}_2$ . Calcd. 244.9926. Found:  $m/z$  244.9926 ( $\text{M}+\text{H}$ )<sup>+</sup>.

***N,N*-Diethoxycarbonylmethyl-1-(5-bromo-2-nitrophenyl)ethanamine (24).**

A solution of **23** (150 mg, 0.620 mmol) and sodium iodide (0.840 g, 5.60 mmol) in acetonitrile (20 mL), pentamethyl piperidine (350  $\mu\text{L}$ , 2.00 mmol) and bromoethyl acetate (300 mg, 1.80 mmol) was heated for 20 h at 60 °C. The solvent was removed under reduced pressure and the residue was purified by column chromatography (silica, 15% ethyl acetate in hexanes, v/v) to give 0.160 g (62%) of **24** as an amorphous white solid. <sup>1</sup>H NMR: (300 MHz,  $\text{CDCl}_3$ )  $\delta$  8.15 (d,  $J$  = 2.2 Hz, 1H, Ar H-3), 7.62 (d,  $J$  = 8.6 Hz, 1H, Ar H-6), 7.48 (dd,  $J$  = 2.2 and 8.6 Hz, 1H, Ar H-4), 4.74 (q,  $J$  = 6.6 Hz, 1H, benzylic-CH), 4.13 (q,  $J$  = 7.1 Hz, 4H,  $-\text{CH}_2-\text{CH}_3$ ), 1.78-2.22 (br s, 2H,  $\text{NH}_2$ ), 1.38 (d,  $J$  = 6.6 Hz, 3H,  $\text{CH}-\text{CH}_3$ ), 1.25 (t,  $J$  = 7.1 Hz, 3H,  $-\text{CH}_2-\text{CH}_3$ ). <sup>13</sup>C NMR (75 MHz,  $\text{CDCl}_3$ )  $\delta$  170.94, 148.06, 142.16, 132.30, 130.92, 127.70, 125.33, 60.60, 55.49, 52.65, 21.14, 14.20. HRMS ( $m/z$ ) for  $\text{C}_{16}\text{H}_{22}\text{BrN}_2\text{O}_6$ . Calcd. 417.0661. Found:  $m/z$  417.0660 ( $\text{M}+\text{H}$ )<sup>+</sup>.

**2-[3-{1-(*N,N*-Diethoxycarbonylmethyl)aminoethyl}-4-nitrostyryl]-5-(4-nitrostyryl)-thiophene (11).**

Compound **24** (150 mg, 0.36 mmol), **20** (185 mg, 0.72 mmol), lithium chloride (45.0 mg, 1.10 mmol), sodium bicarbonate (100 mg, 1.20 mmol), and tetrabutylammonium chloride (100 mg, 0.360 mmol) were dissolved in DMF (5 mL) and purged with  $\text{N}_2$  for 20 min. TPGS-750-M (5% wt in water, 200  $\mu\text{L}$ ) and palladium(II) acetate (16 mg, 0.07 mmol) were added to the reaction mixture, which was heated at 110 °C for 1 h. Water (100 mL) was added to the reaction mixture, which was then extracted with ethyl acetate (3 x 100 mL). The organic layer was separated and dried under reduced pressure. The residue was purified by column chromatography (silica, 40% ethyl acetate in hexanes, v/v) to give 43.0 mg (21%) of **11** as an amorphous red solid. <sup>1</sup>H NMR: (300 MHz,  $\text{CDCl}_3$ )  $\delta$  8.19 (d,  $J$  = 8.9 Hz, 2H, Ar H), 8.10 (d,  $J$  = 1.9 Hz, 1H, Ar H), 7.78 (d,  $J$  = 8.5 Hz, 2H, Ar H), 7.57 (d,  $J$  = 8.9 Hz, 2H, Ar H), 7.41 (dd,  $J$  = 1.9 and 8.5 Hz, 1H, Ar H), 7.35 (d,  $J$  = 16 Hz, 1H, vinyl CH), 7.33 (d,  $J$  = 16 Hz, 1H, vinyl CH), 7.08 (s, 2H, thiophene-CH), 6.99 (d,  $J$  = 16 Hz, 2H, vinyl-CH), 5.23 (dd,  $J$  = 3.2 and 6.6 Hz, 2H, benzylic-CH), 4.05-4.23 (m, 16H,  $-\text{CH}_2-$ ), 3.89 (s, 8H,  $-\text{CH}_2-$ ), 3.41-3.85 (m, 24H,  $-\text{CH}_2-$ ), 3.25 (t,  $J$  = 4.5 Hz, 4H,  $-\text{CH}_2-$ ), 1.20-1.30 (m, 24H,  $-\text{CH}_3$ ). <sup>13</sup>C NMR (75 MHz,  $\text{CDCl}_3$ )  $\delta$  171.30, 147.87, 146.58, 143.12, 142.52, 141.75, 141.62, 141.07, 129.12, 128.77, 126.96, 126.91, 126.58, 126.29, 125.82, 125.17, 125.06, 124.89, 124.14, 60.66, 55.62, 52.81, 21.51, 14.34. HRMS ( $m/z$ ) for  $\text{C}_{30}\text{H}_{32}\text{N}_3\text{O}_8\text{S}$ . Calcd. 594.1910. Found:  $m/z$  594.1910 ( $\text{M}+\text{H}$ )<sup>+</sup>.

**Synthesis of compound 14.**

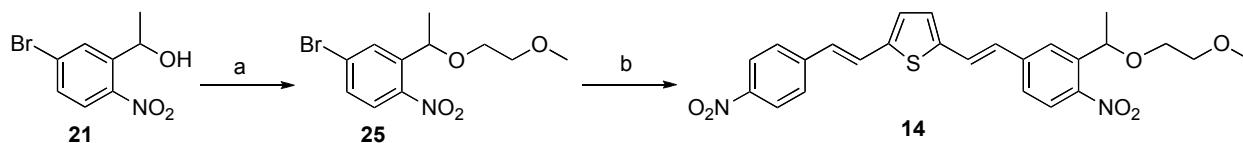

Reagents and conditions: (a) 2-bromoethyl methyl ether, NaH, DMF, 20 h, RT; (b) **16**, Pd(OAc)<sub>2</sub>, LiCl, TBACl, NaHCO<sub>3</sub>, TPGS-750-M, DMF, 1 h, 110 °C.

#### 4-Bromo-2-{1-(2-methoxyethoxy)ethyl}nitrobenzene (**25**).

Compound **21** (90 mg, 0.36 mmol) and 2-bromoethyl methyl ether (50.0 mg, 0.370 mmol) were dissolved in DMF (5 mL) and a suspension of NaH (30.0 mg, 0.750 mmol) in DMF (5 mL) was added and the reaction mixture was stirred at room temperature for 20 h. The solvent was evaporated and the residue purified by column chromatography (silica, 10% ethyl acetate in hexanes, v/v) to give 56.0 mg (51%) of **25** as an amorphous white solid. <sup>1</sup>H NMR: (300 MHz, CDCl<sub>3</sub>) δ 7.97 (d, *J* = 2.2 Hz, 1H, Ar H-3), 7.79 (d, *J* = 8.7 Hz, 1H, Ar H-6), 7.52 (dd, *J* = 2.2 and 8.7 Hz, 1H, Ar H-5), 5.04 (q, *J* = 6.3 Hz, 1H, benzylic-CH), 3.36-3.56 (m, 4H, -CH<sub>2</sub>-), 3.33 (s, 3H, -CH<sub>3</sub>), 1.50 (d, *J* = 6.3 Hz, 3H, -CH<sub>3</sub>). <sup>13</sup>C NMR (75 MHz, CDCl<sub>3</sub>) δ 146.79, 142.10, 131.02, 128.73, 125.77, 73.40, 71.79, 68.58, 58.94, 23.56. HRMS (*m/z*) for C<sub>11</sub>H<sub>15</sub>BrNO<sub>4</sub>. Calcd. 304.0184. Found: *m/z* 304.0151 (M+H)<sup>+</sup>.

#### 2-[3-{1-(2-methoxyethoxy)ethyl}-4-nitrostyryl]-5-(4-nitrostyryl)-thiophene (**14**).

Compound **25** (50.0 mg, 0.160 mmol), **16** (85.0 mg, 0.330 mmol), lithium chloride (21.0 mg, 0.500 mmol), sodium bicarbonate (42 mg, 0.5 mmol), and tetrabutylammonium chloride (47.0 mg, 0.170 mmol) were dissolved in DMF (5 mL) and the solution was purged with N<sub>2</sub> for 20 min. TPGS-750-M (5% wt in water, 100 μL) and palladium(II) acetate (10.0 mg, 0.045 mmol) were added to the reaction mixture, which was then heated at 110 °C for 1 h. Water (100 mL) was added to the cooled reaction mixture, which was then extracted with ethyl acetate (3 x 100 mL). The organic layer was separated and dried under reduced pressure. The residue was purified by column chromatography (silica, 20% ethyl acetate in hexanes, v/v) to give 71.0 mg (90%) of **14** as an amorphous red solid. <sup>1</sup>H NMR: (300 MHz, CDCl<sub>3</sub>) δ 8.21 (d, *J* = 8.9 Hz, 2H, Ar H), 7.99 (d, *J* = 8.6 Hz, 1H, Ar H-5), 7.96 (d, *J* = 2.0 Hz, 1H, Ar H-2), 7.59 (d, *J* = 8.9 Hz, 2H, Ar H), 7.45 (dd, *J* = 2.0 and 8.6 Hz, 1H, Ar H-6), 7.38 (d, *J* = 16.0 Hz, 1H, vinyl CH), 7.35 (d, *J* = 16.0 Hz, 1H, vinyl CH), 7.10 (s, 2H, thiophene CH), 6.95 (d, *J* = 16.0 Hz, 2H, vinyl CH), 5.16 (q, *J* = 6.3 Hz, 1H, benzylic-CH), 3.43-3.66 (m, 4H, -CH<sub>2</sub>-), 3.39 (s, 3H, -CH<sub>3</sub>), 1.57 (d, *J* = 6.3 Hz, 3H, -CH<sub>3</sub>). <sup>13</sup>C NMR (75 MHz, CDCl<sub>3</sub>) δ 146.49, 146.44, 143.01, 142.34, 142.20, 141.87, 140.92, 129.12, 128.82, 126.74, 126.52, 126.30, 125.71, 125.41, 125.30, 125.06, 124.05, 73.73, 71.92, 68.43, 58.99, 23.74. HRMS (*m/z*) for C<sub>25</sub>H<sub>26</sub>N<sub>2</sub>O<sub>7</sub>S. Calcd. 498.1461. Found: *m/z* 498.1689 (M+H<sub>2</sub>O)<sup>+</sup>.



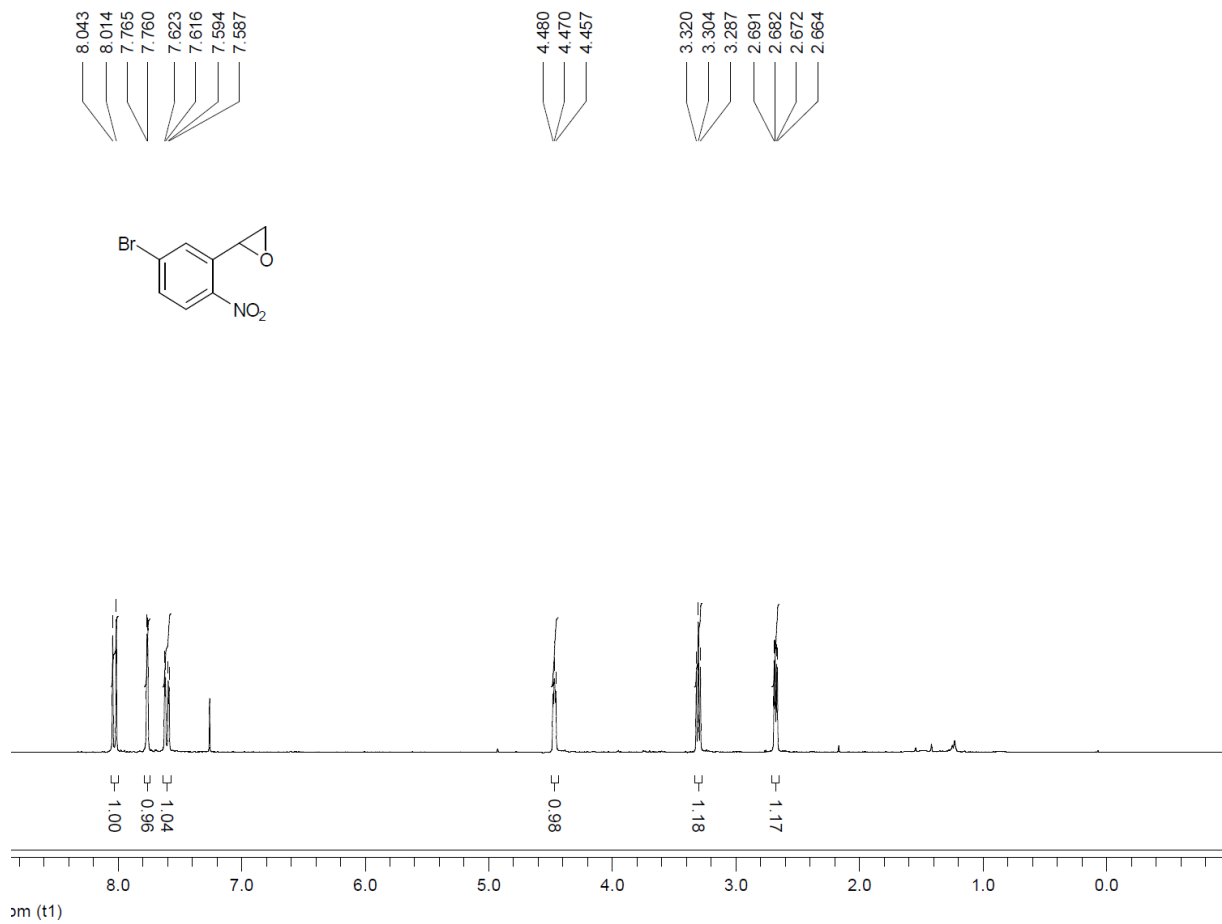

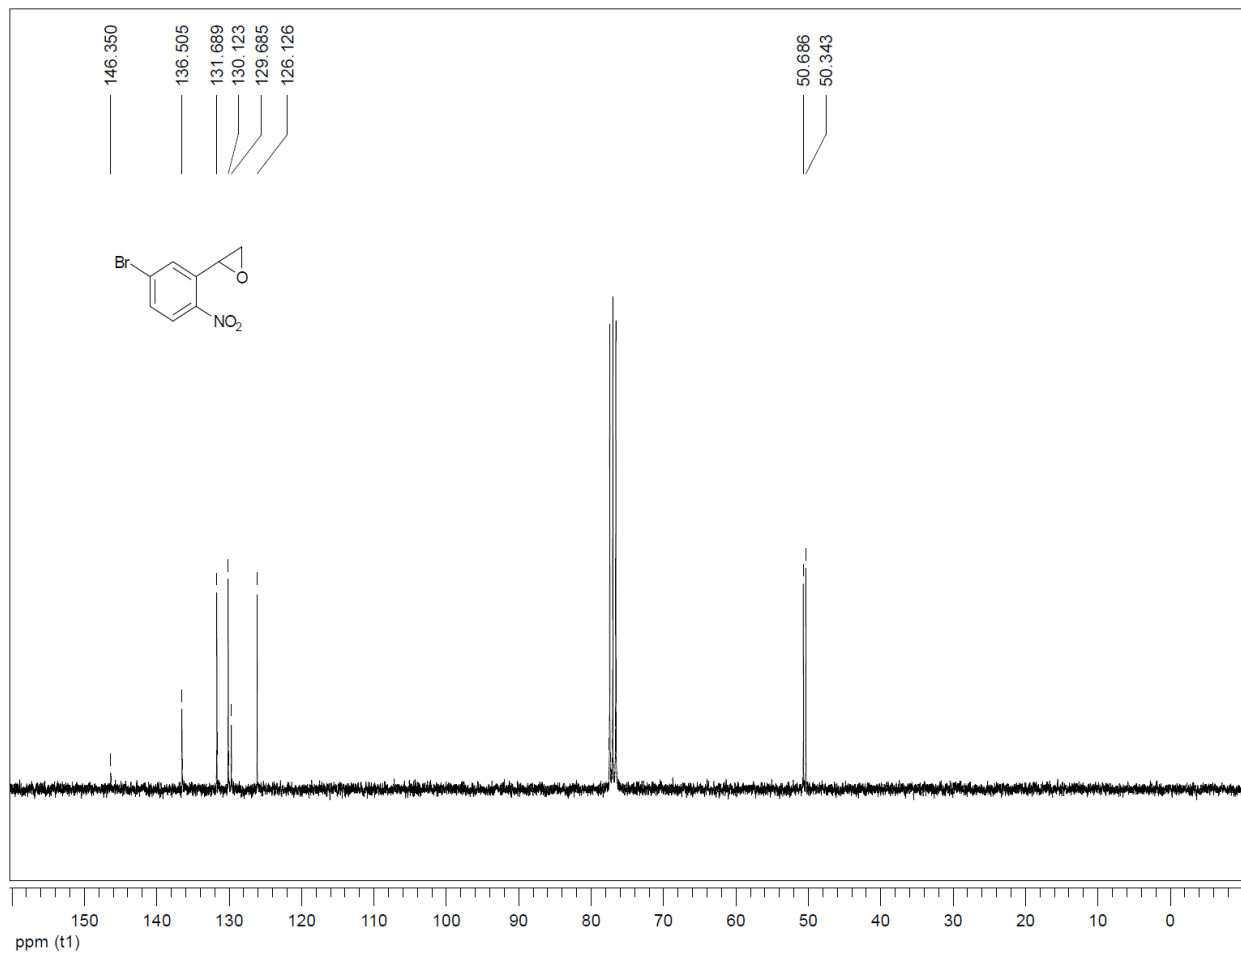

**Compound Table**

| Compound Label       | RT    | Mass     | Abund  | Formula       | Tgt Mass | Diff (ppm) | MFG Formula   | DB Formula    |
|----------------------|-------|----------|--------|---------------|----------|------------|---------------|---------------|
| Cpd 1: C8 H6 Br N O3 | 0.198 | 242.9535 | 146289 | C8 H6 Br N O3 | 242.9531 | 1.44       | C8 H6 Br N O3 | C8 H6 Br N O3 |

| Compound Label       | m/z      | RT    | Algorithm       | Mass     |
|----------------------|----------|-------|-----------------|----------|
| Cpd 1: C8 H6 Br N O3 | 243.9608 | 0.198 | Find By Formula | 242.9535 |

MS Spectrum

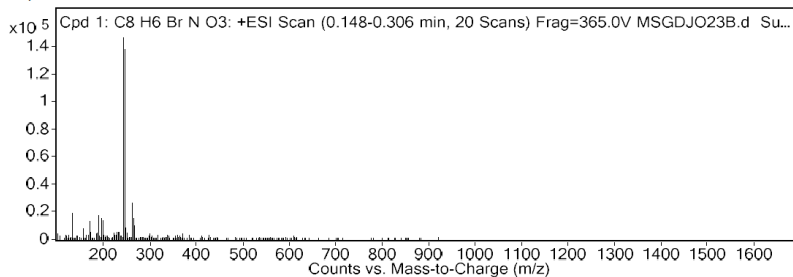

MS Zoomed Spectrum

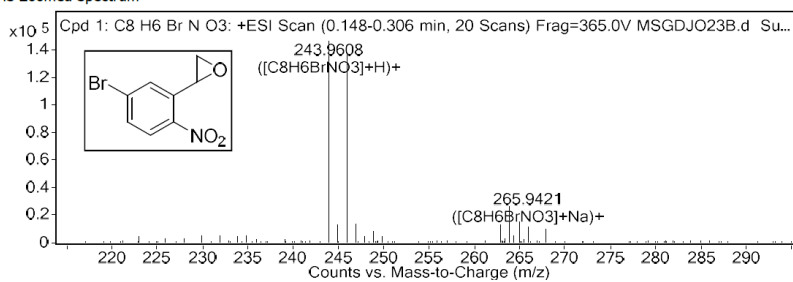

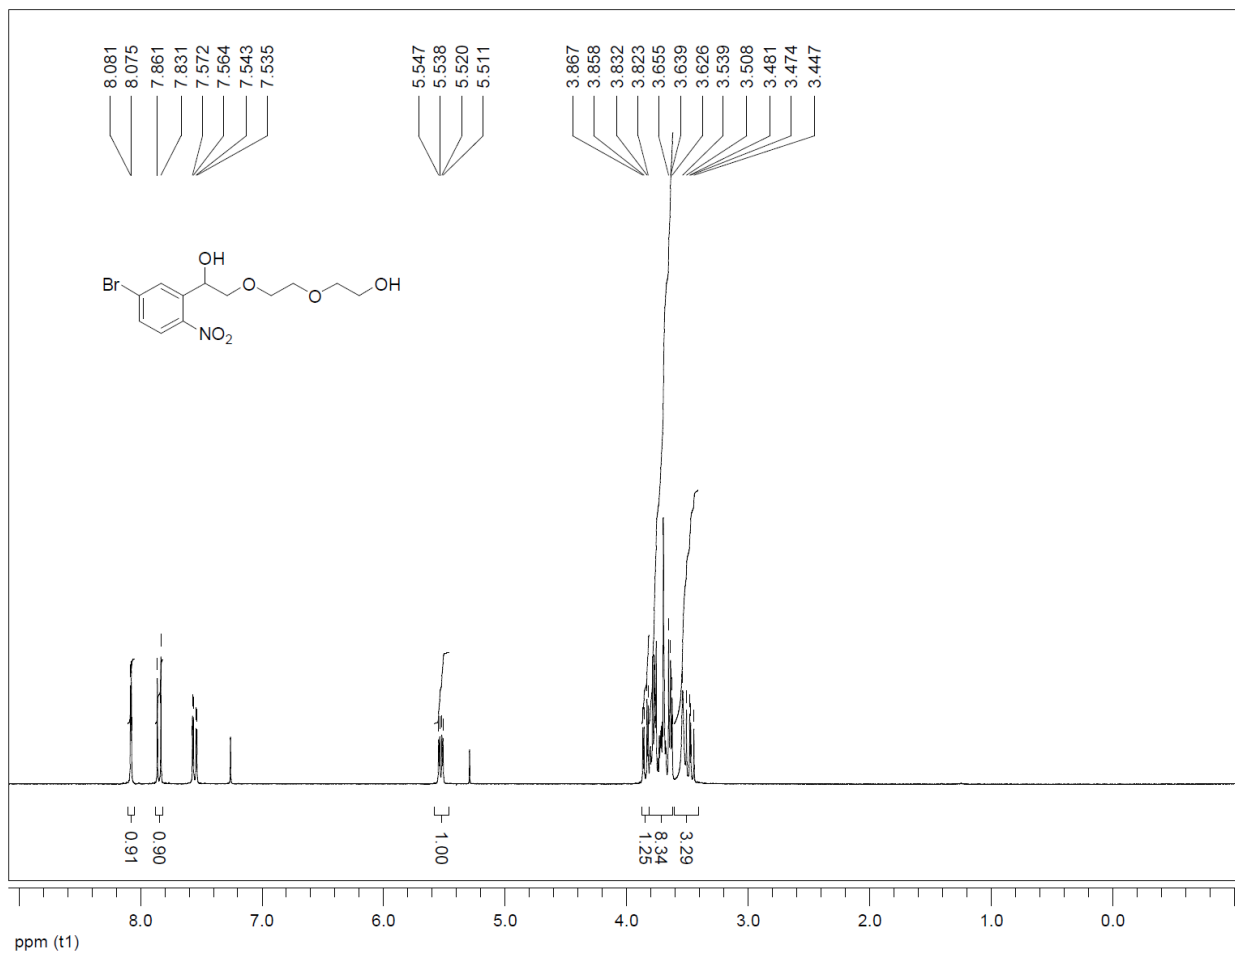

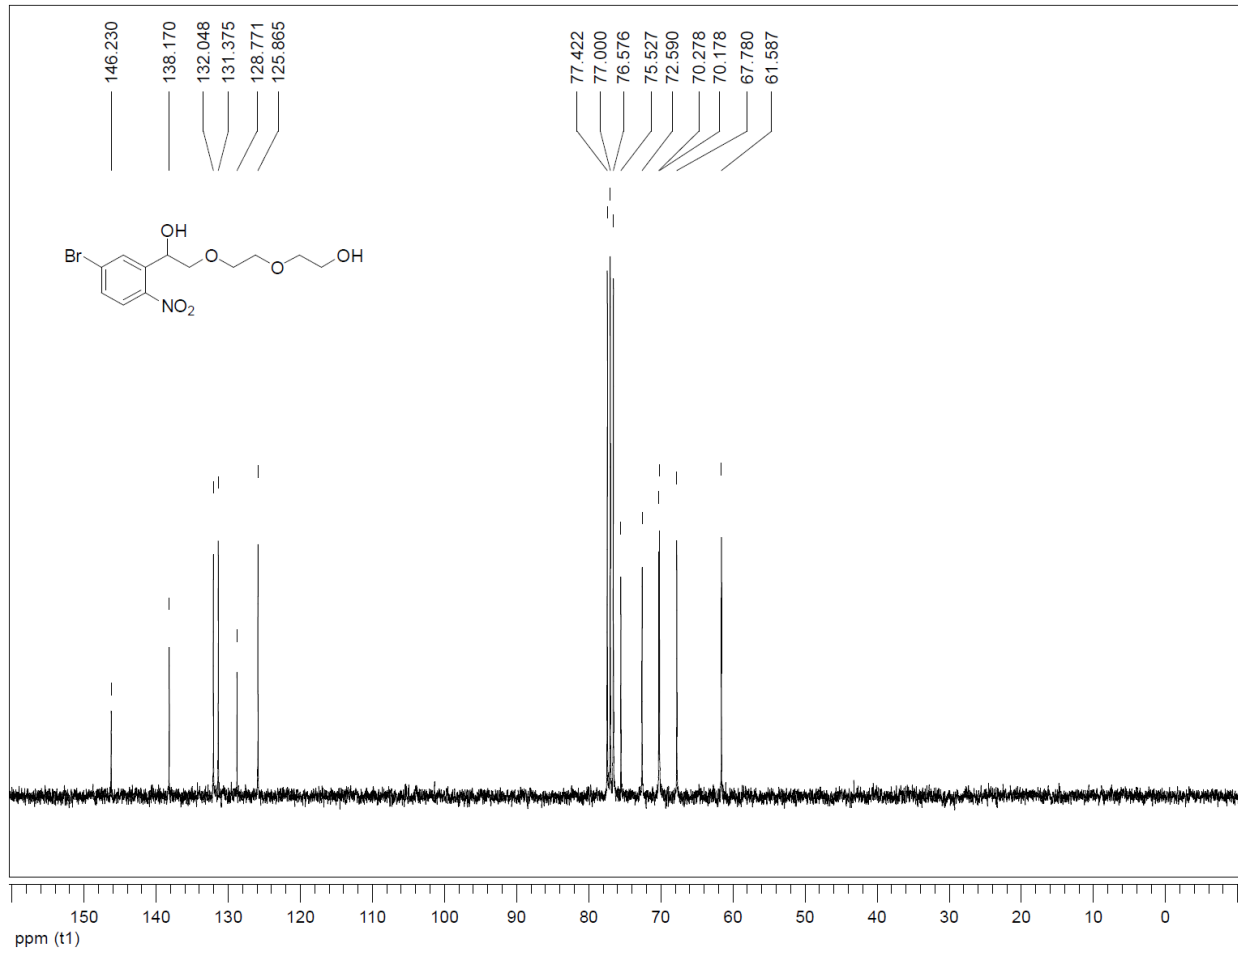

**Compound Table**

| Compound Label         | RT   | Mass     | Abund | Formula         | Tgt Mass | Diff (ppm) | MFG Formula     | DB Formula      |
|------------------------|------|----------|-------|-----------------|----------|------------|-----------------|-----------------|
| Cpd 1: C12 H16 Br N O6 | 0.18 | 349.0164 | 10917 | C12 H16 Br N O6 | 349.0161 | 0.87       | C12 H16 Br N O6 | C12 H16 Br N O6 |

| Compound Label         | m/z     | RT   | Algorithm       | Mass     |
|------------------------|---------|------|-----------------|----------|
| Cpd 1: C12 H16 Br N O6 | 369.048 | 0.18 | Find By Formula | 349.0164 |

MS Spectrum

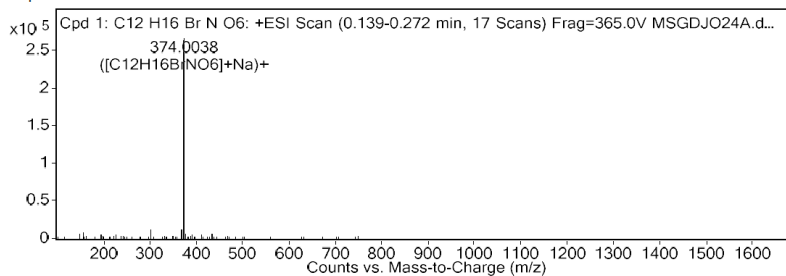

MS Zoomed Spectrum

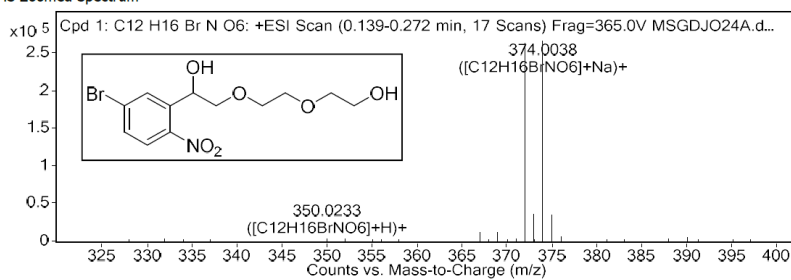

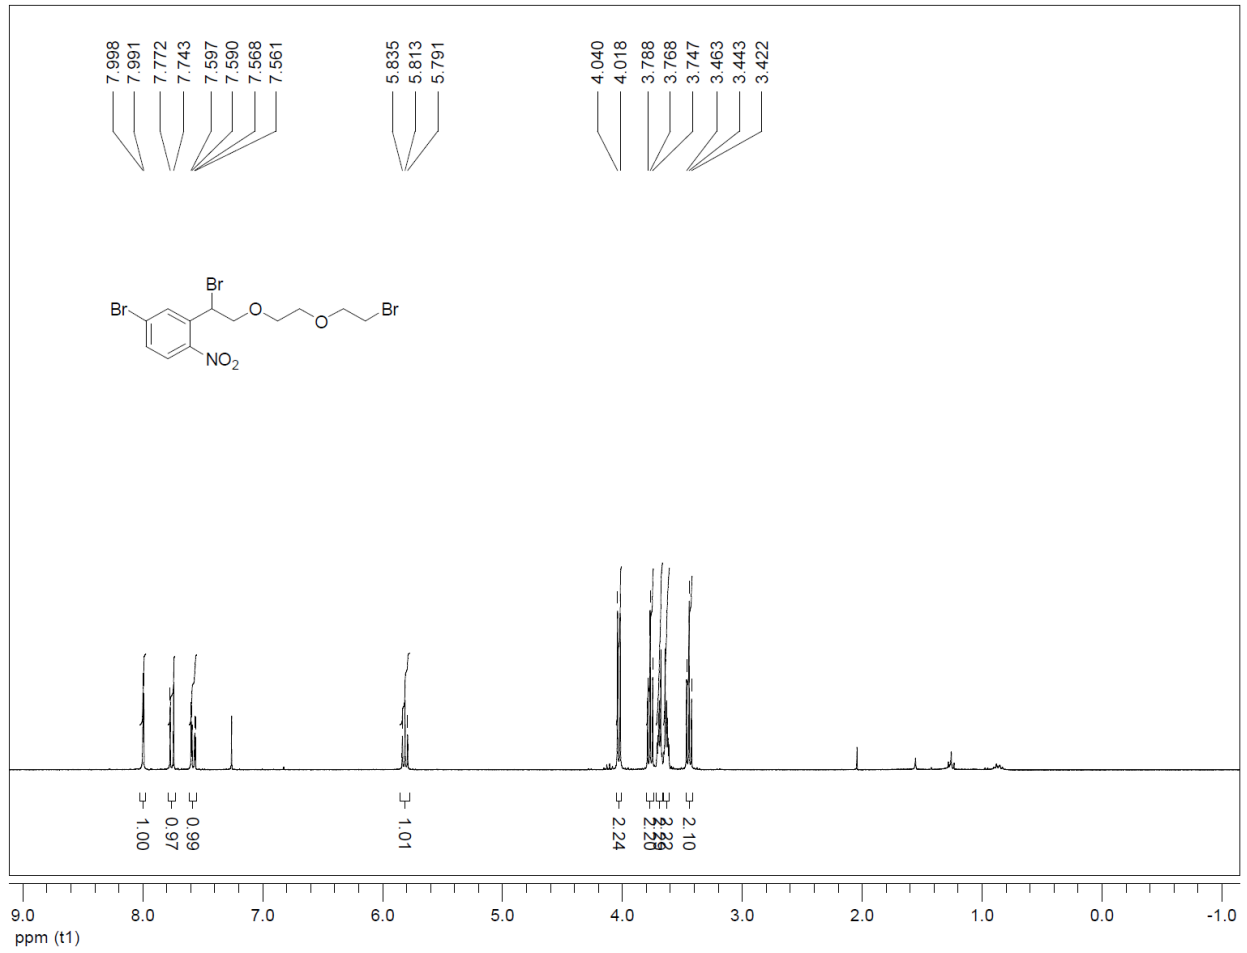

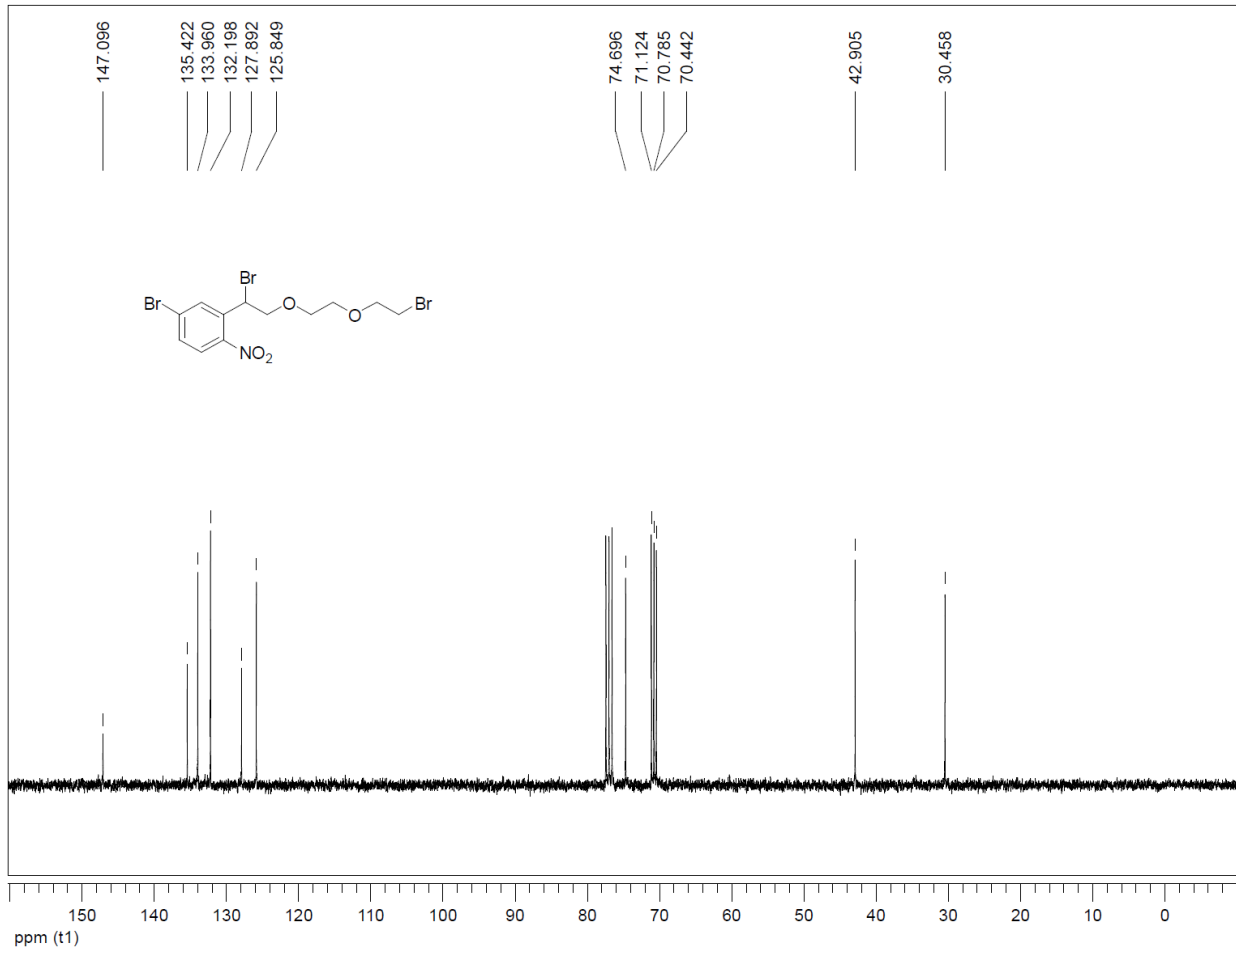



**Compound Table**

| Compound Label          | RT    | Mass     | Abund  | Formula          | Tgt Mass | Diff (ppm) | MFG Formula      | DB Formula       |
|-------------------------|-------|----------|--------|------------------|----------|------------|------------------|------------------|
| Cpd 1: C12 H14 Br3 N O4 | 0.093 | 472.8479 | 387207 | C12 H14 Br3 N O4 | 472.8473 | 1.28       | C12 H14 Br3 N O4 | C12 H14 Br3 N O4 |

| Compound Label          | m/z      | RT    | Algorithm       | Mass     |
|-------------------------|----------|-------|-----------------|----------|
| Cpd 1: C12 H14 Br3 N O4 | 497.8351 | 0.093 | Find By Formula | 472.8479 |

MS Spectrum

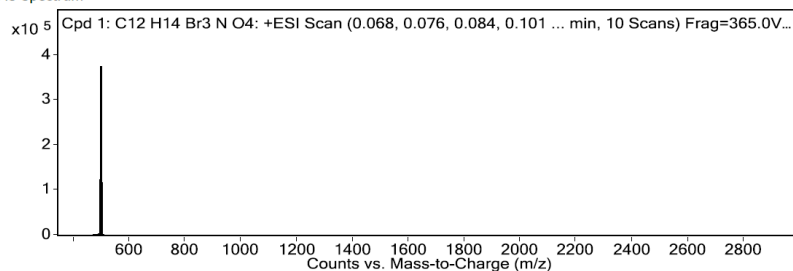

MS Zoomed Spectrum

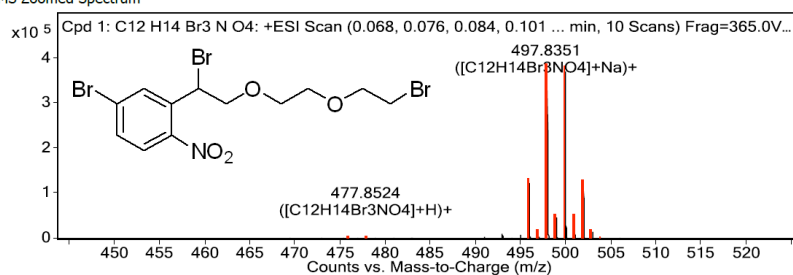

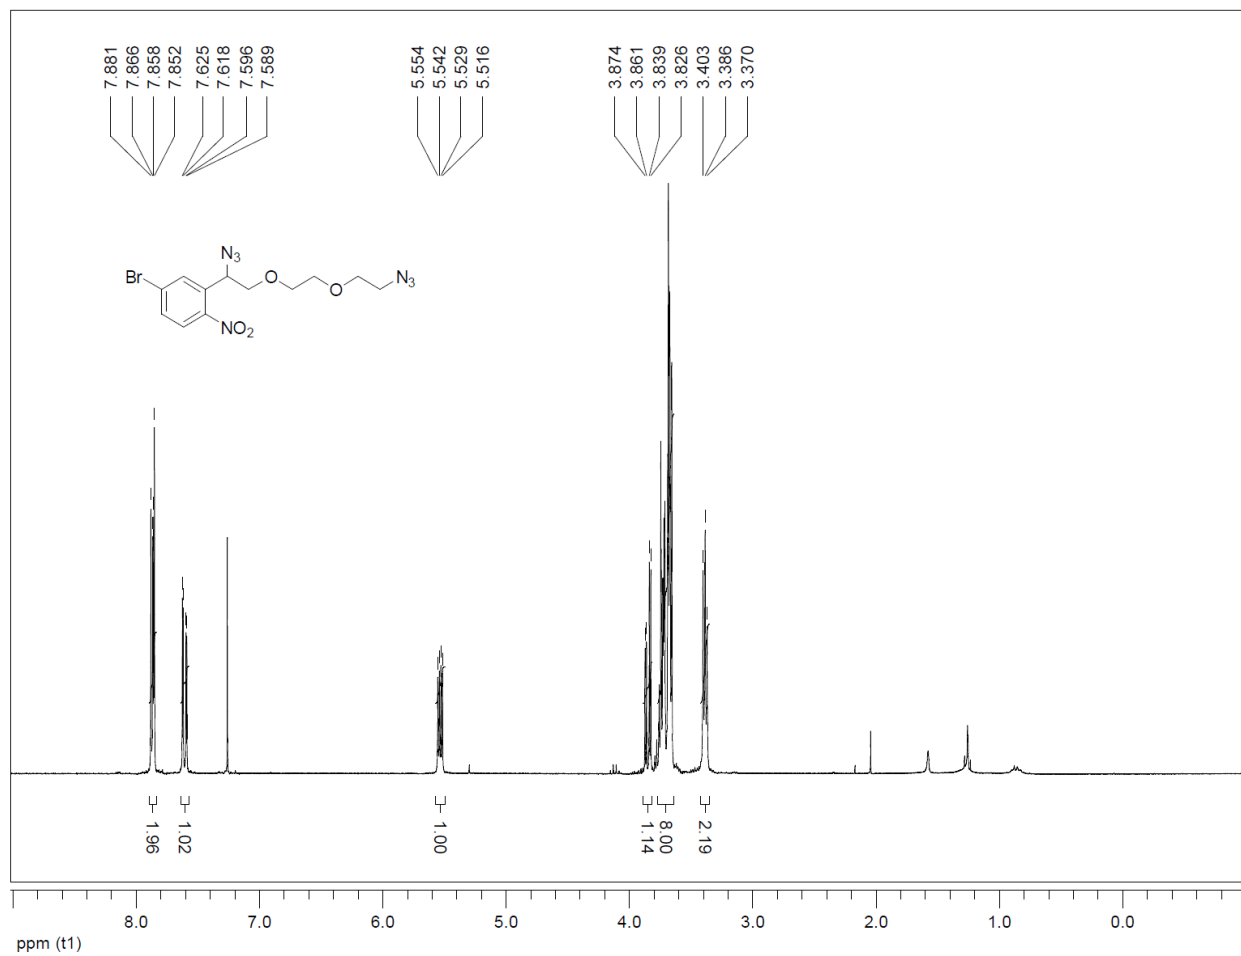

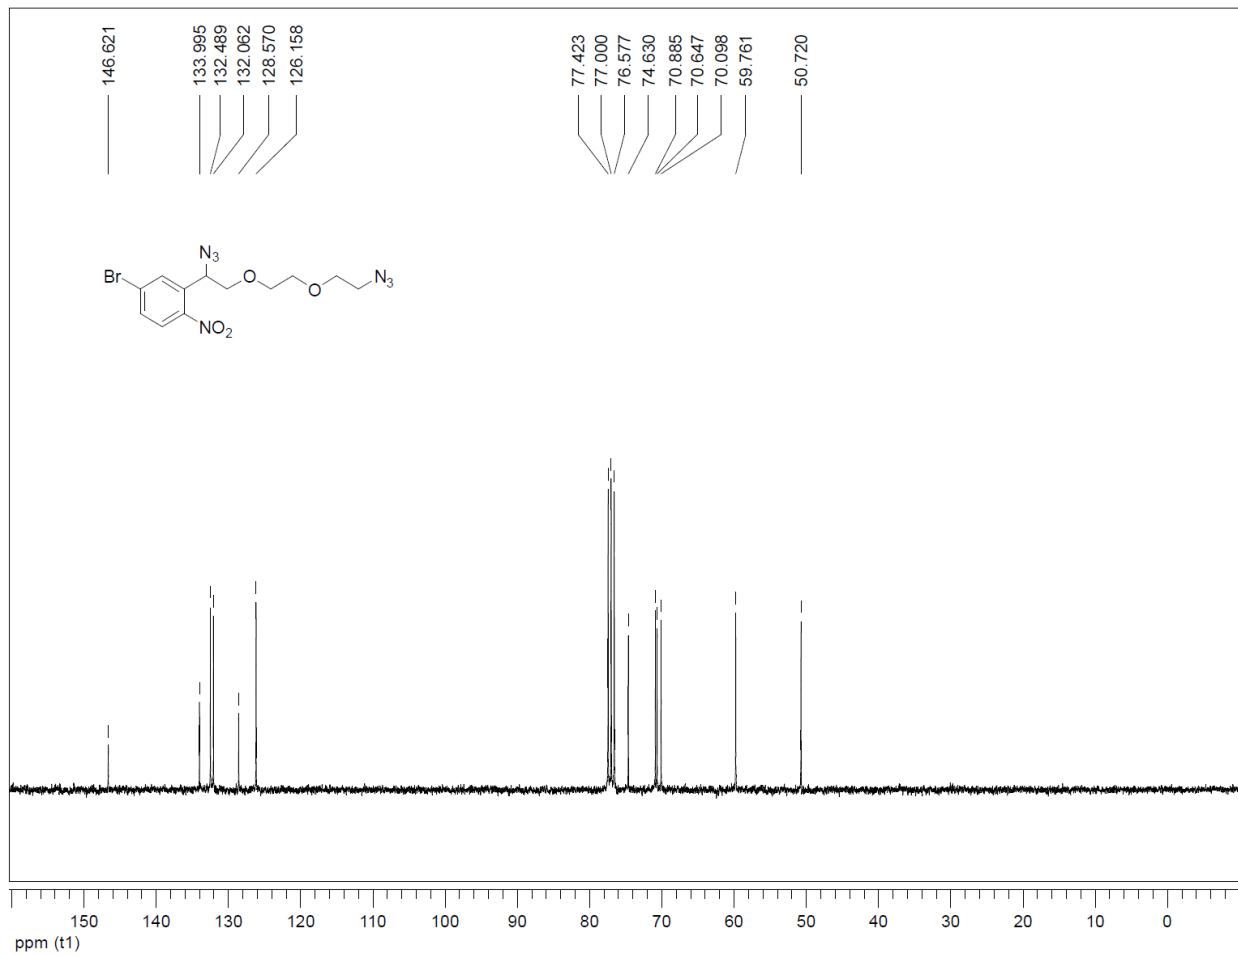

**Compound Table**

| Compound Label          | RT    | Mass     | Abund  | Formula          | Tgt Mass | Diff (ppm) | MFG Formula      | DB Formula       |
|-------------------------|-------|----------|--------|------------------|----------|------------|------------------|------------------|
| Cpd 1: C12 H14 Br N7 O4 | 0.088 | 399.0297 | 447573 | C12 H14 Br N7 O4 | 399.0291 | 1.47       | C12 H14 Br N7 O4 | C12 H14 Br N7 O4 |

| Compound Label          | m/z      | RT    | Algorithm       | Mass     |
|-------------------------|----------|-------|-----------------|----------|
| Cpd 1: C12 H14 Br N7 O4 | 422.0188 | 0.088 | Find By Formula | 399.0297 |

MS Spectrum

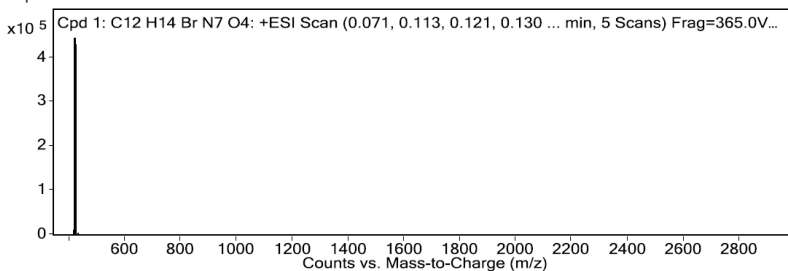

MS Zoomed Spectrum

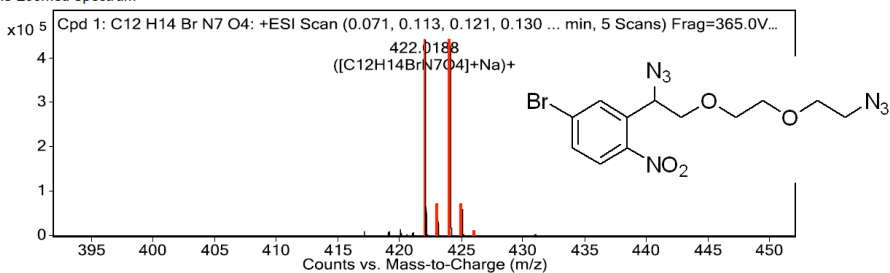

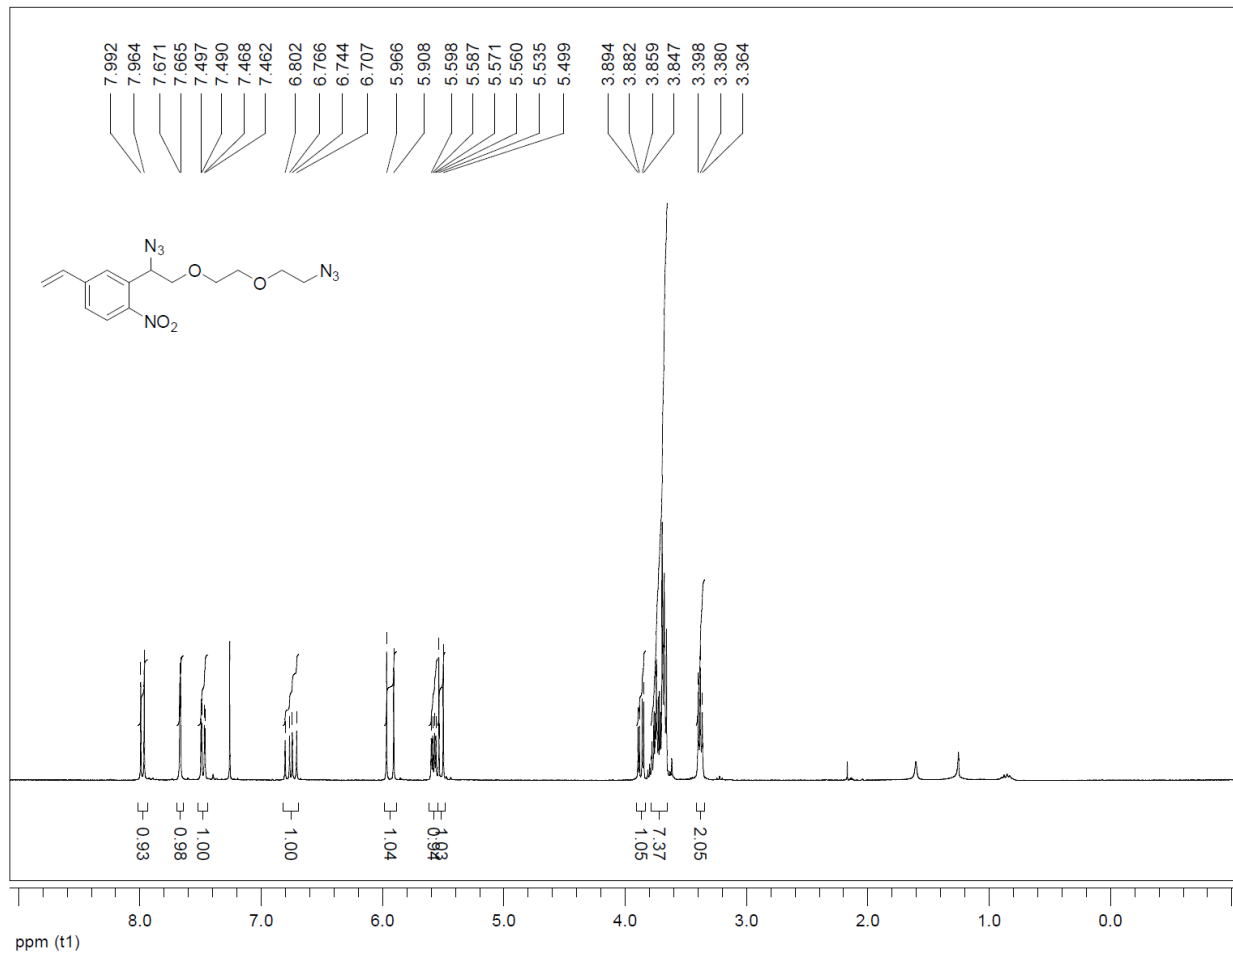

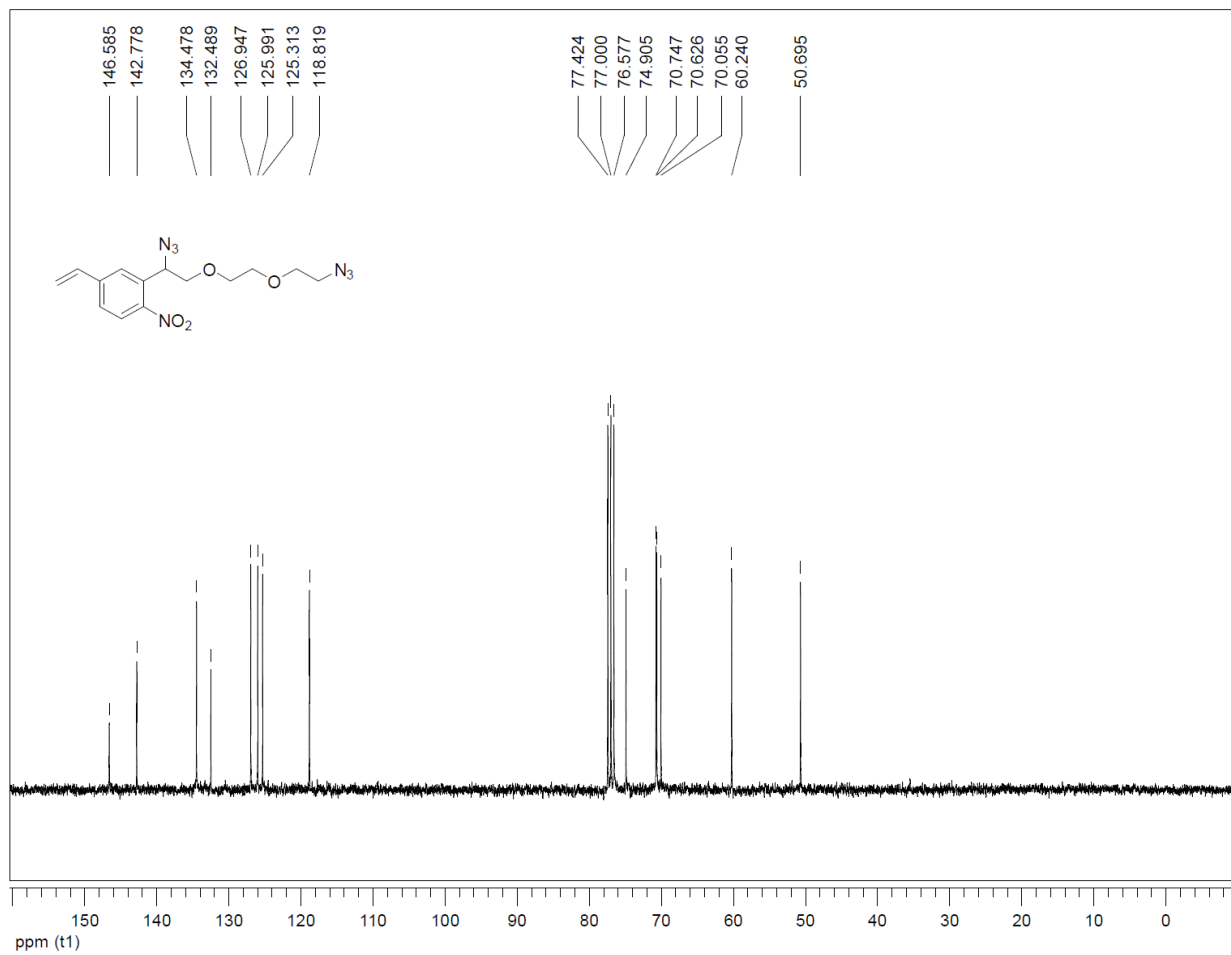

**Compound Table**

| Compound Label       | RT    | Mass     | Abund  | Formula       | Tgt Mass | Diff (ppm) | MFG Formula   | DB Formula    |
|----------------------|-------|----------|--------|---------------|----------|------------|---------------|---------------|
| Cpd 1: C14 H17 N7 O4 | 0.093 | 347.1349 | 448217 | C14 H17 N7 O4 | 347.1342 | 2.15       | C14 H17 N7 O4 | C14 H17 N7 O4 |

| Compound Label       | m/z      | RT    | Algorithm       | Mass     |
|----------------------|----------|-------|-----------------|----------|
| Cpd 1: C14 H17 N7 O4 | 370.1241 | 0.093 | Find By Formula | 347.1349 |

MS Spectrum

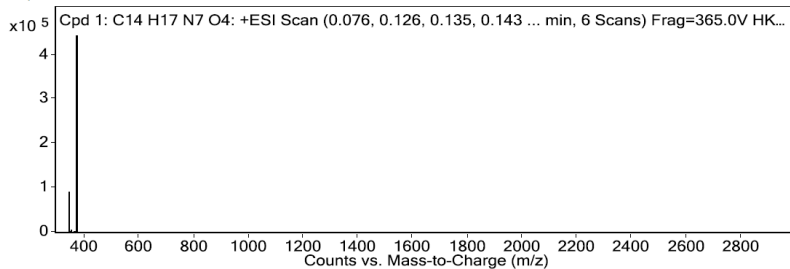

MS Zoomed Spectrum

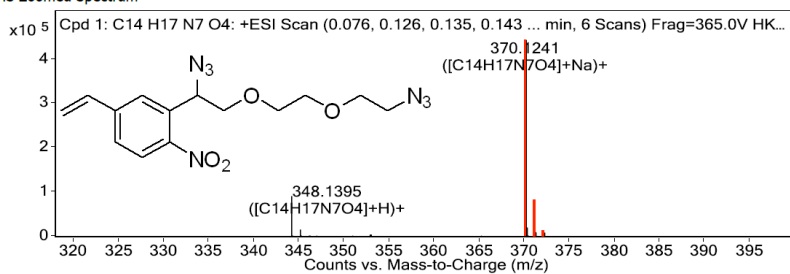

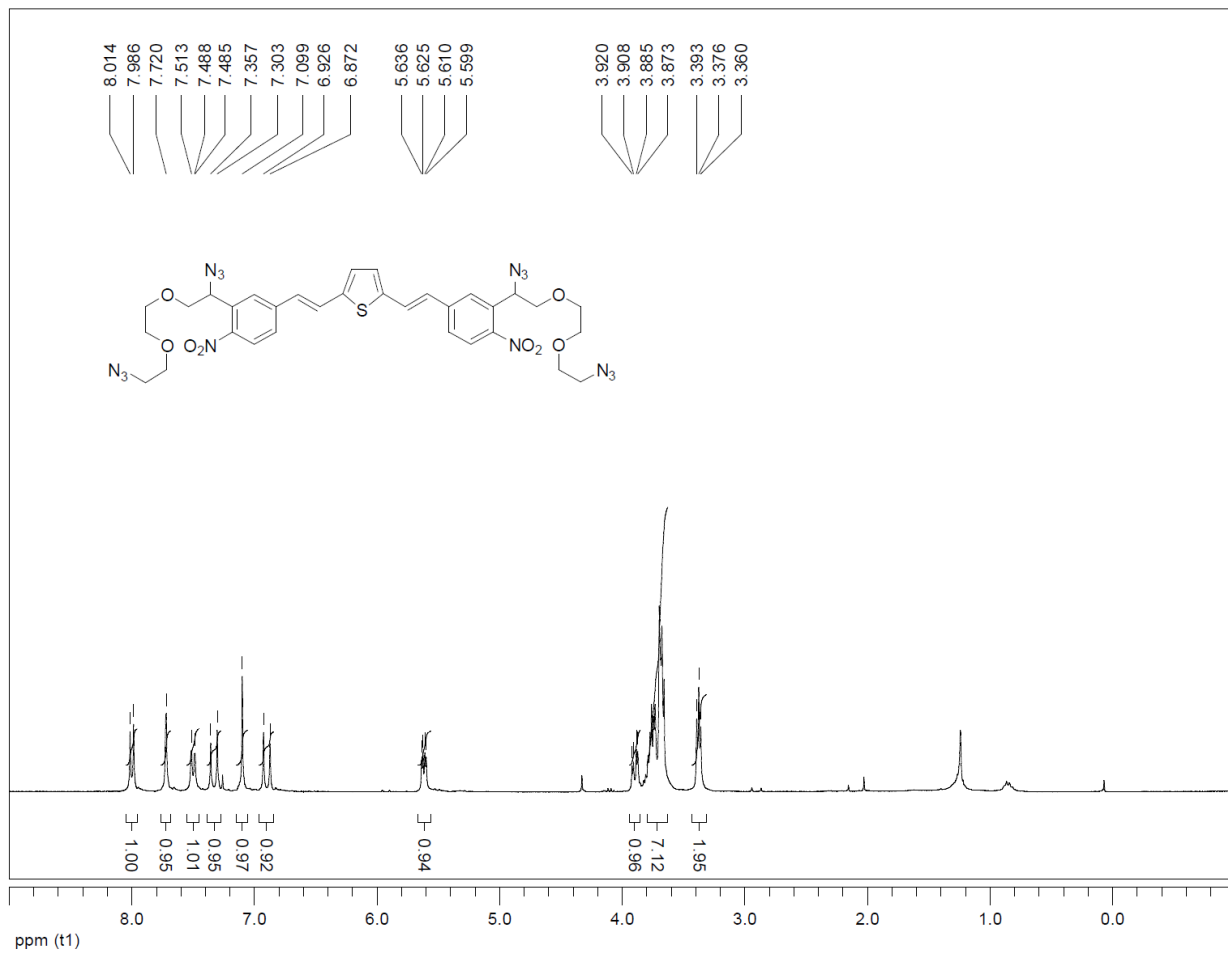



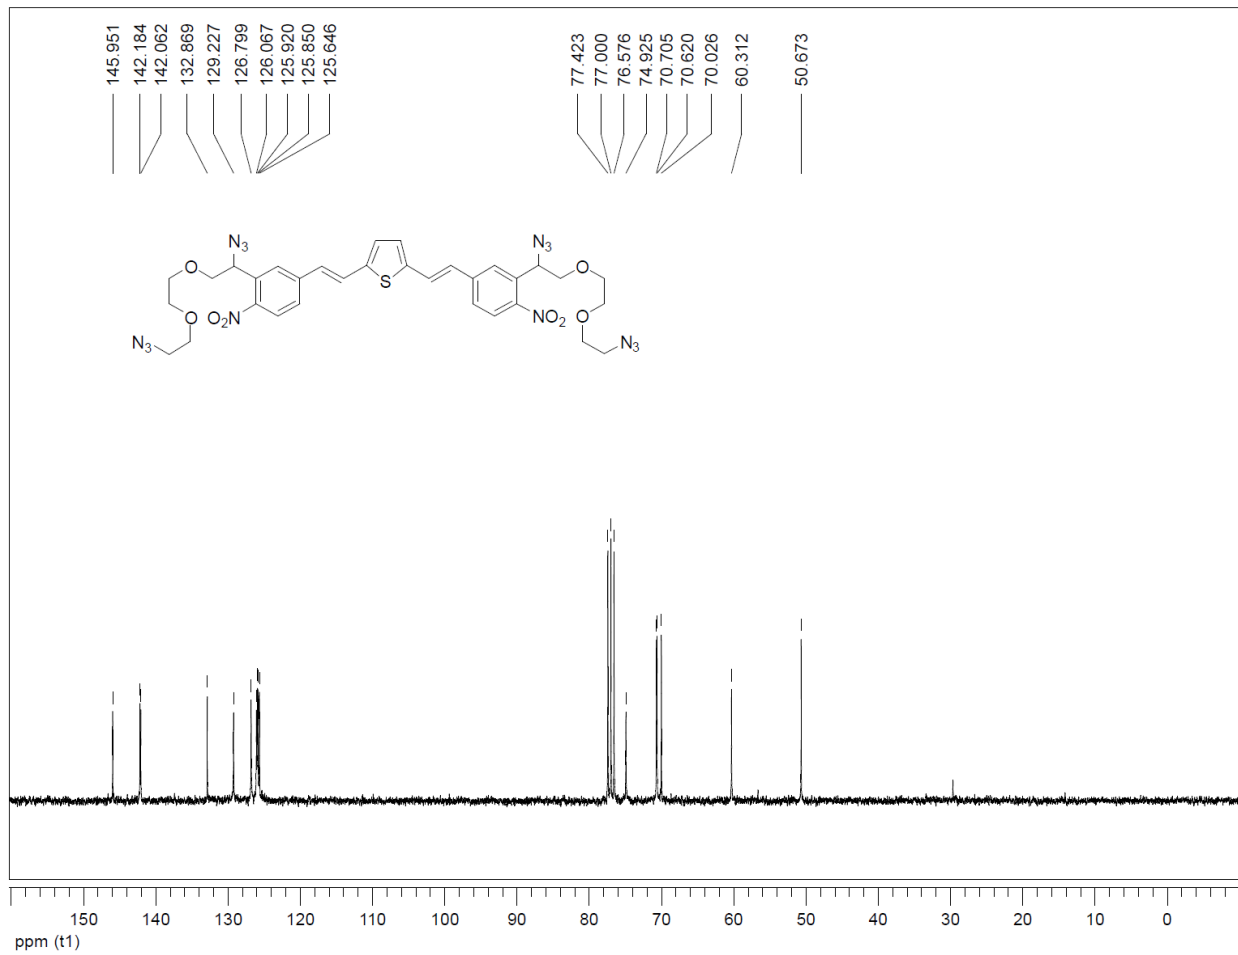

**Compound Table**

| Compound Label          | RT    | Mass     | Abund  | Formula          | Tgt Mass | Diff (ppm) | MFG Formula      | DB Formula       |
|-------------------------|-------|----------|--------|------------------|----------|------------|------------------|------------------|
| Cpd 1: C32 H34 N14 O8 S | 0.095 | 774.2414 | 223129 | C32 H34 N14 O8 S | 774.2405 | 1.15       | C32 H34 N14 O8 S | C32 H34 N14 O8 S |

| Compound Label          | m/z      | RT    | Algorithm       | Mass     |
|-------------------------|----------|-------|-----------------|----------|
| Cpd 1: C32 H34 N14 O8 S | 797.2306 | 0.095 | Find By Formula | 774.2414 |

MS Spectrum

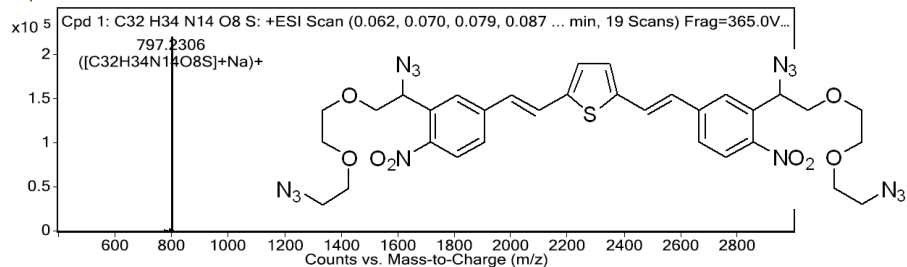

MS Zoomed Spectrum

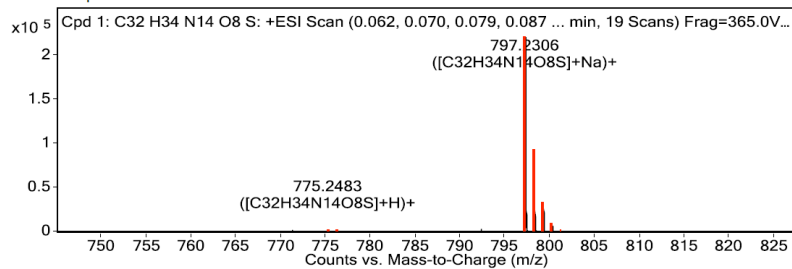

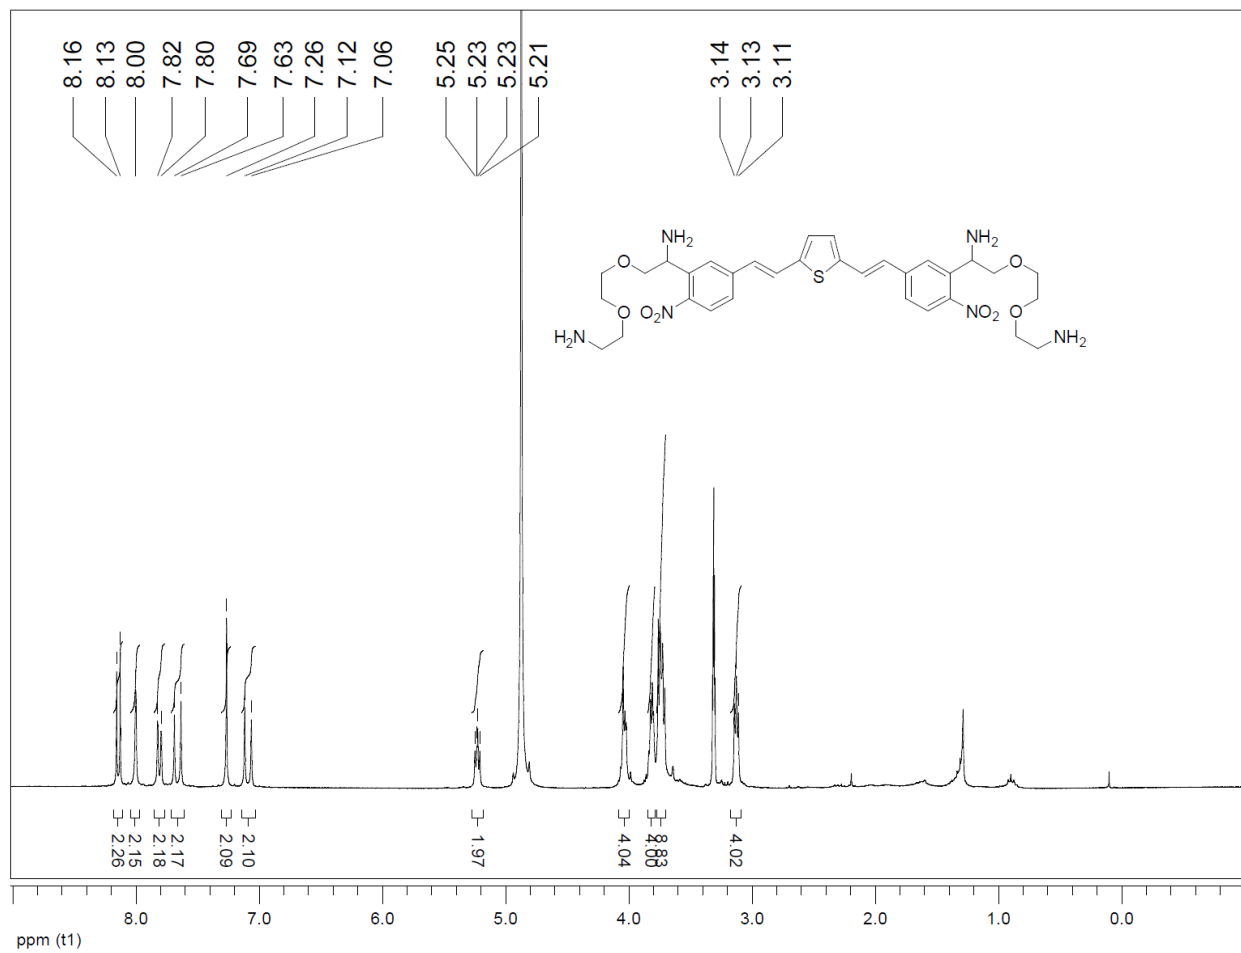

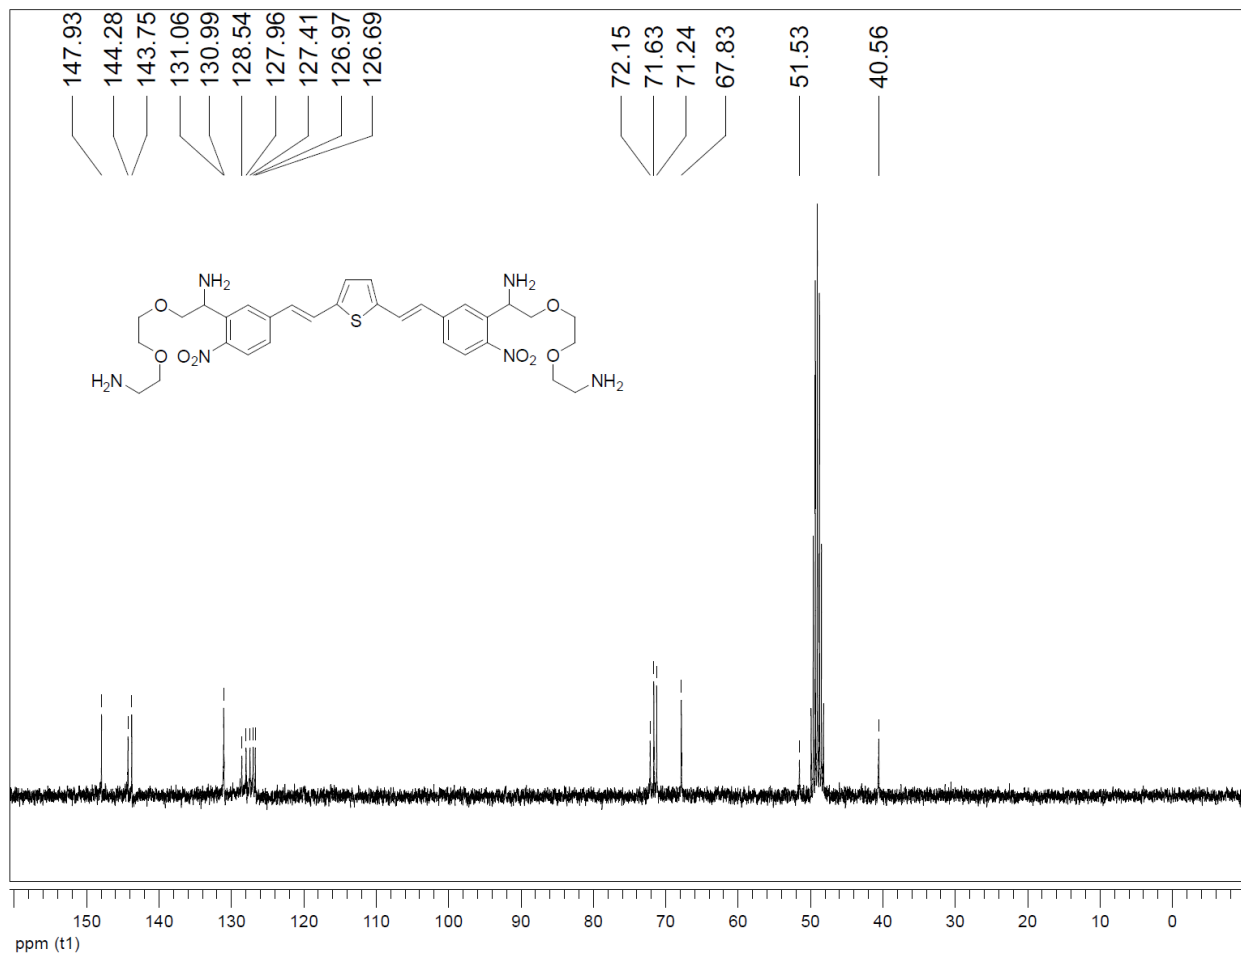

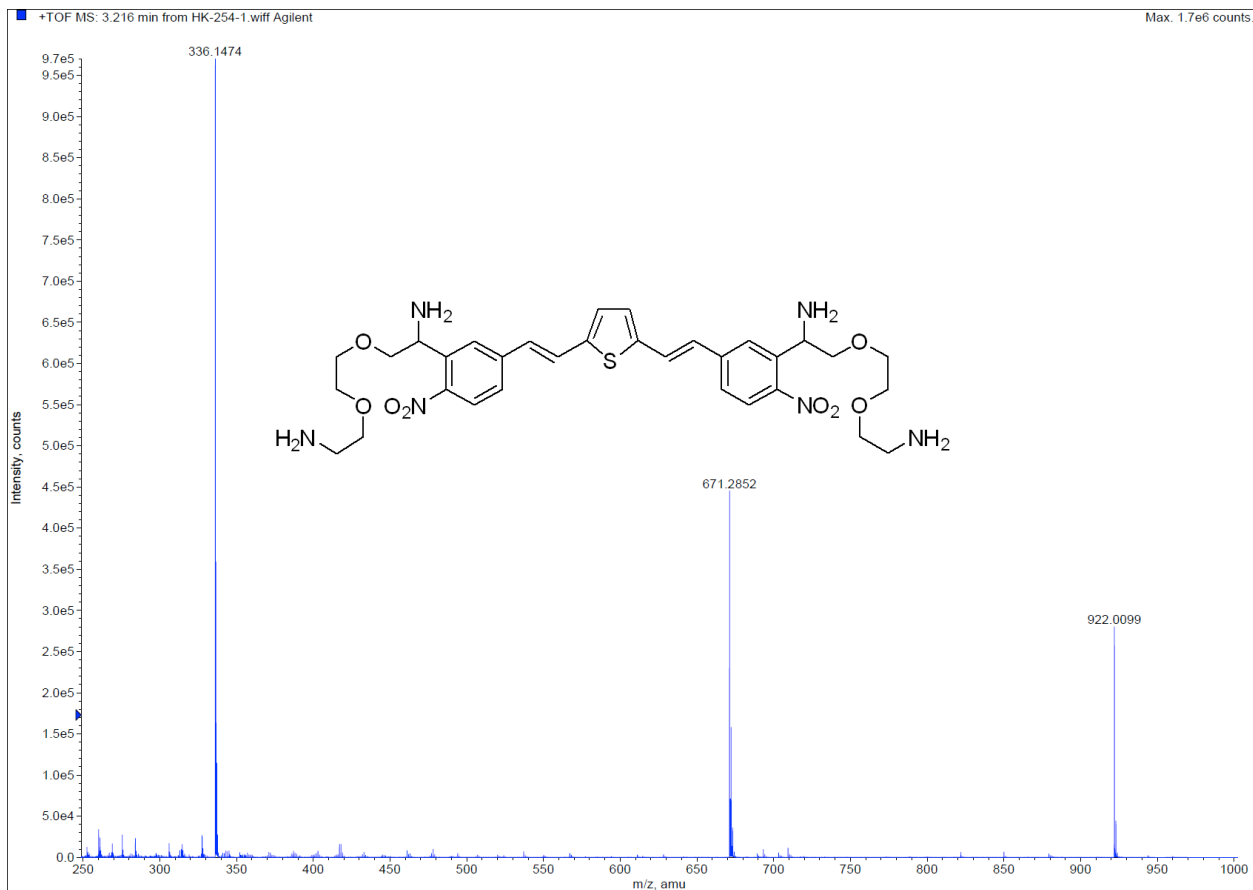

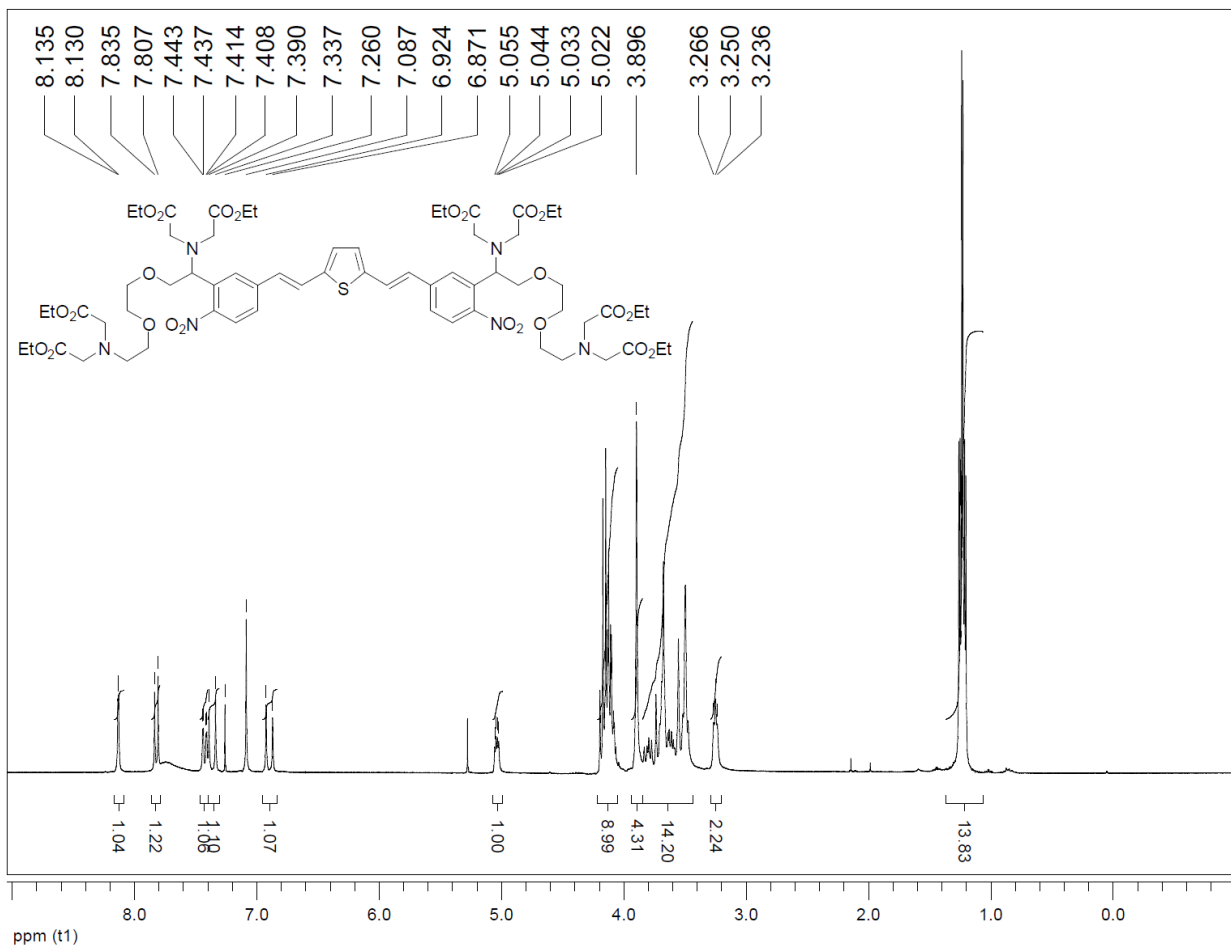

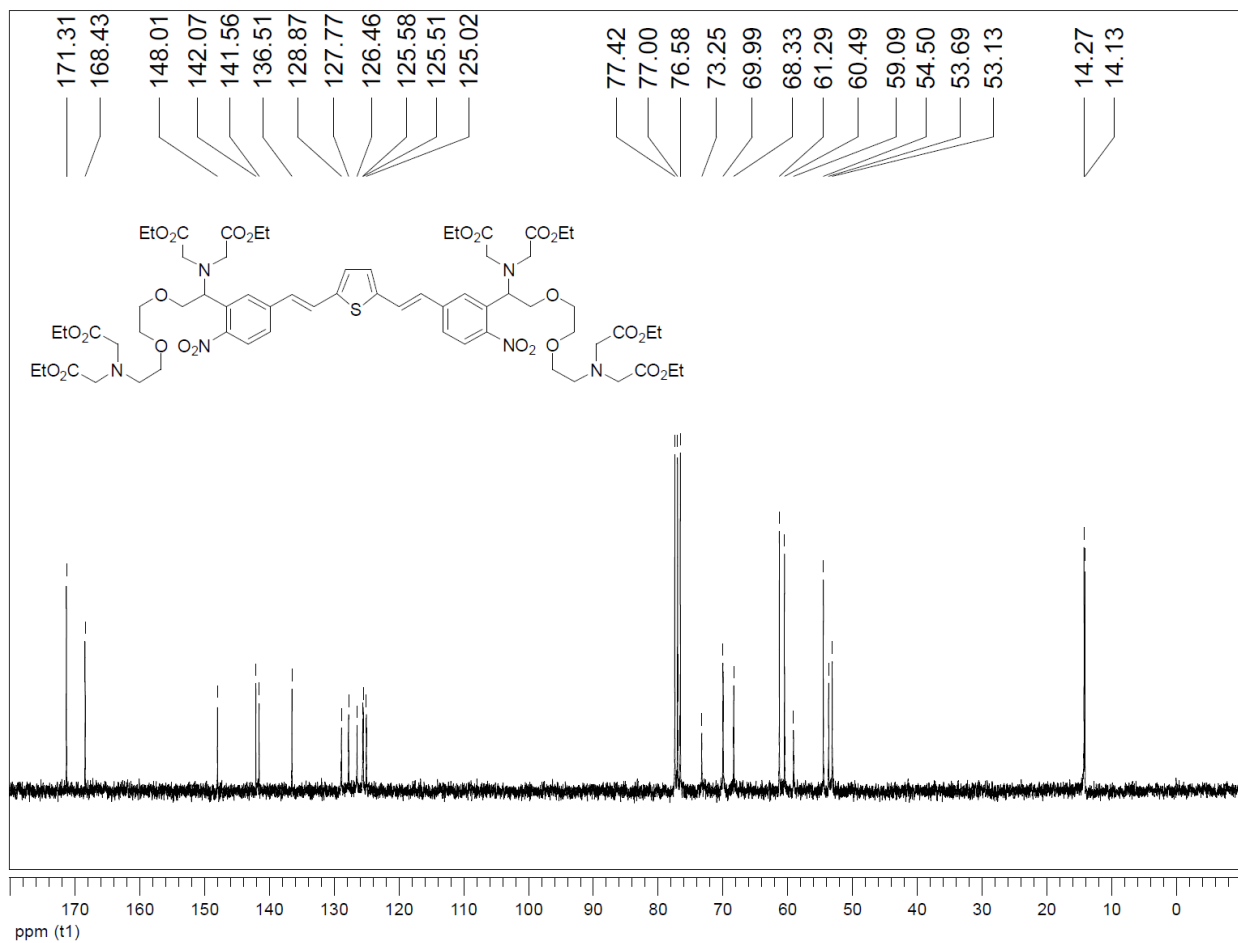

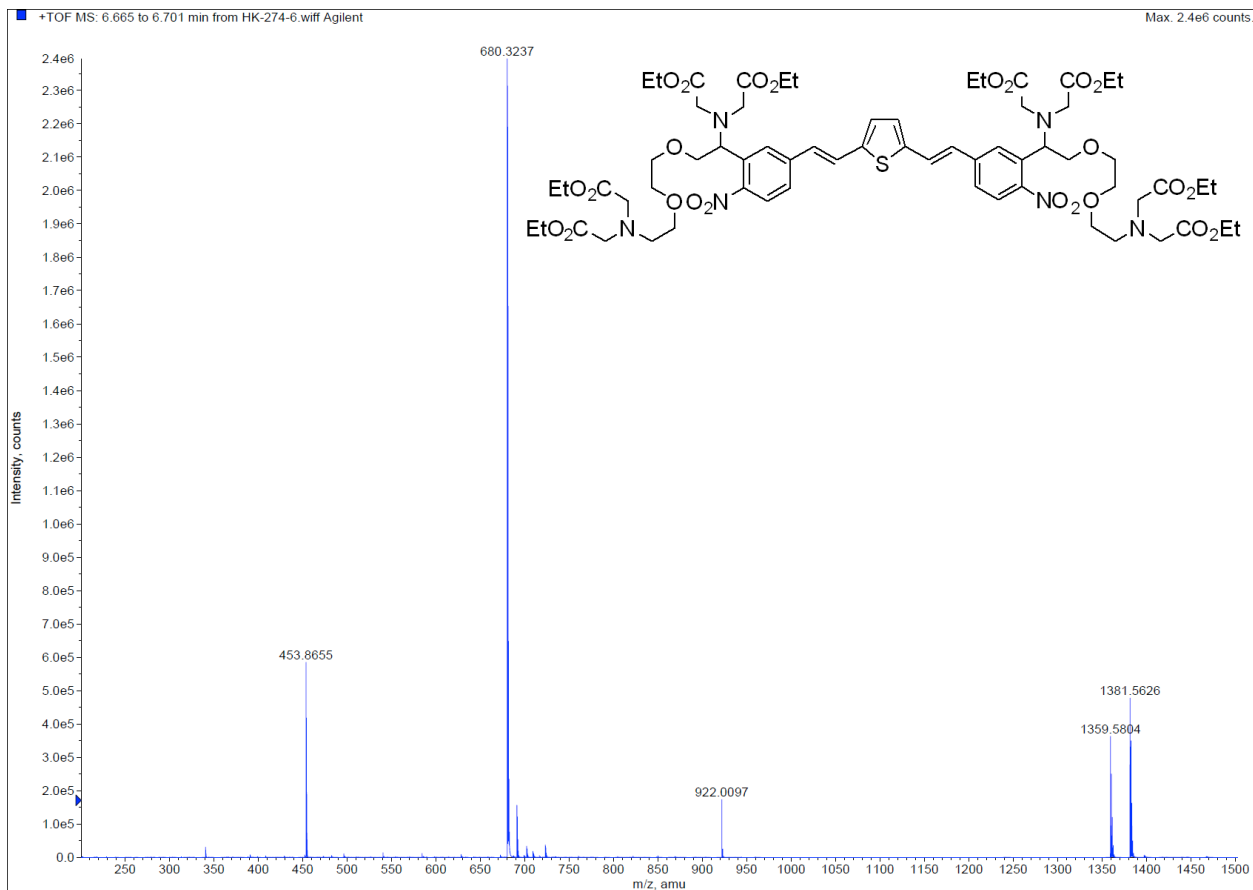



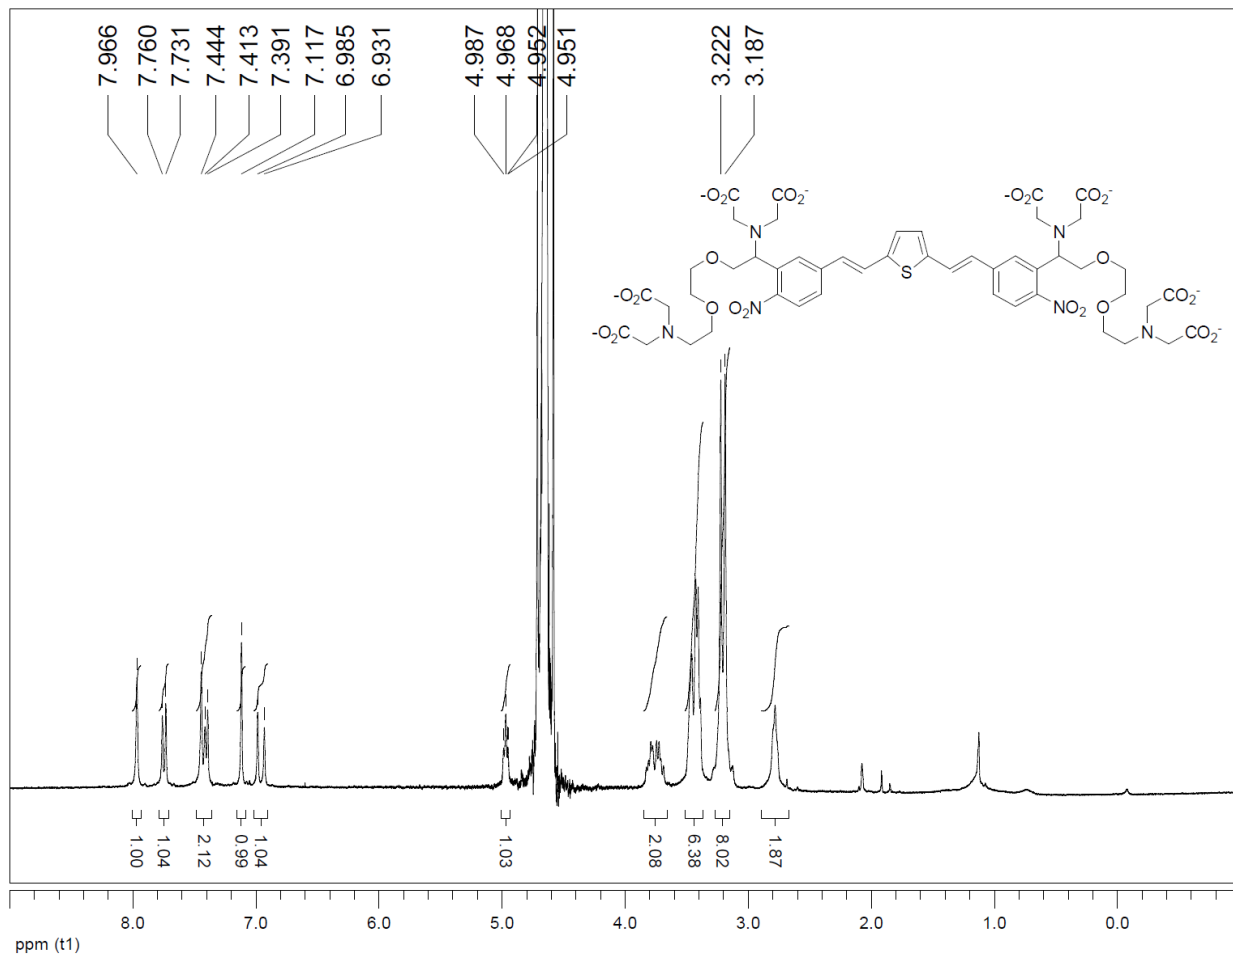

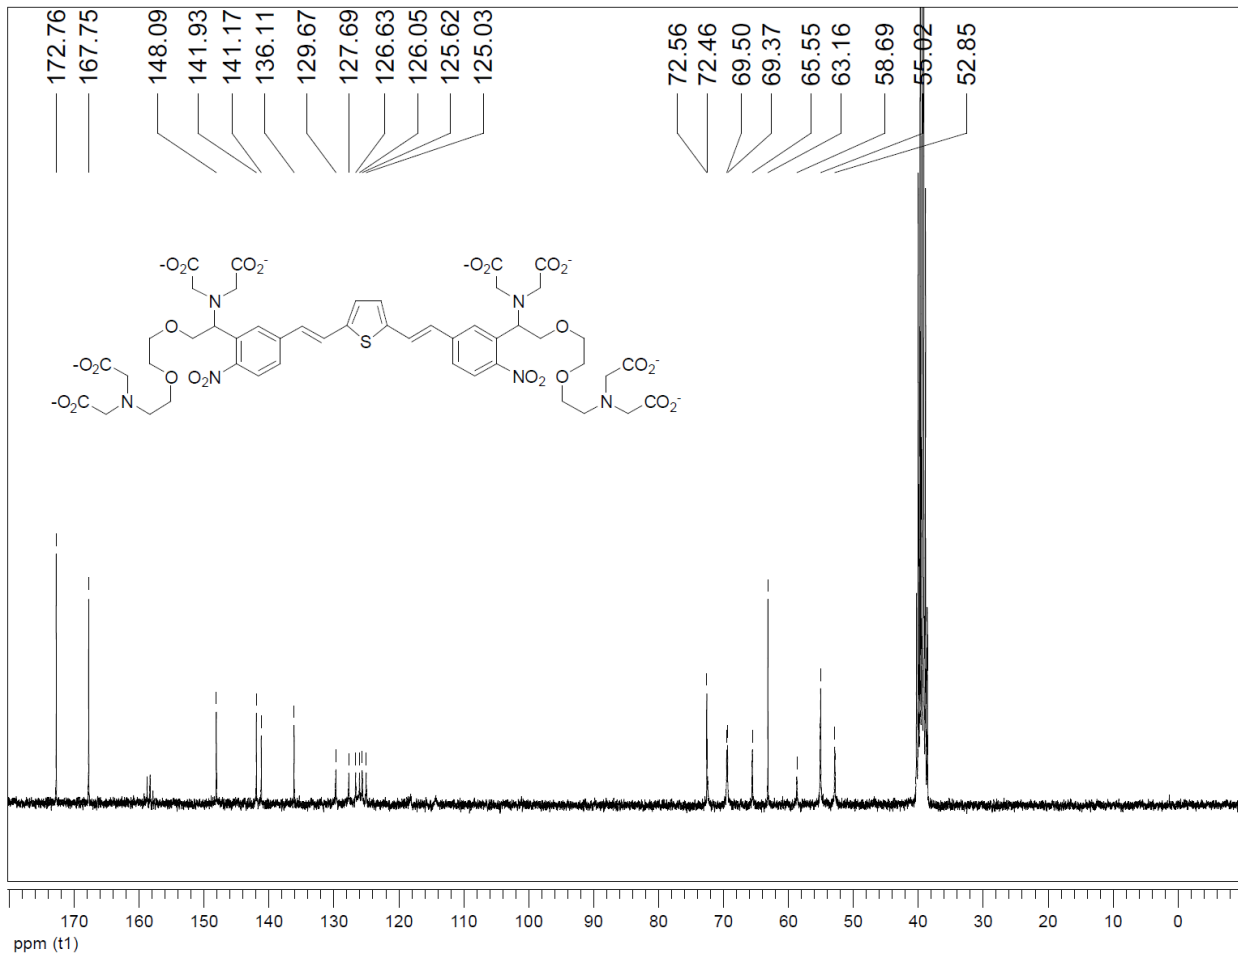

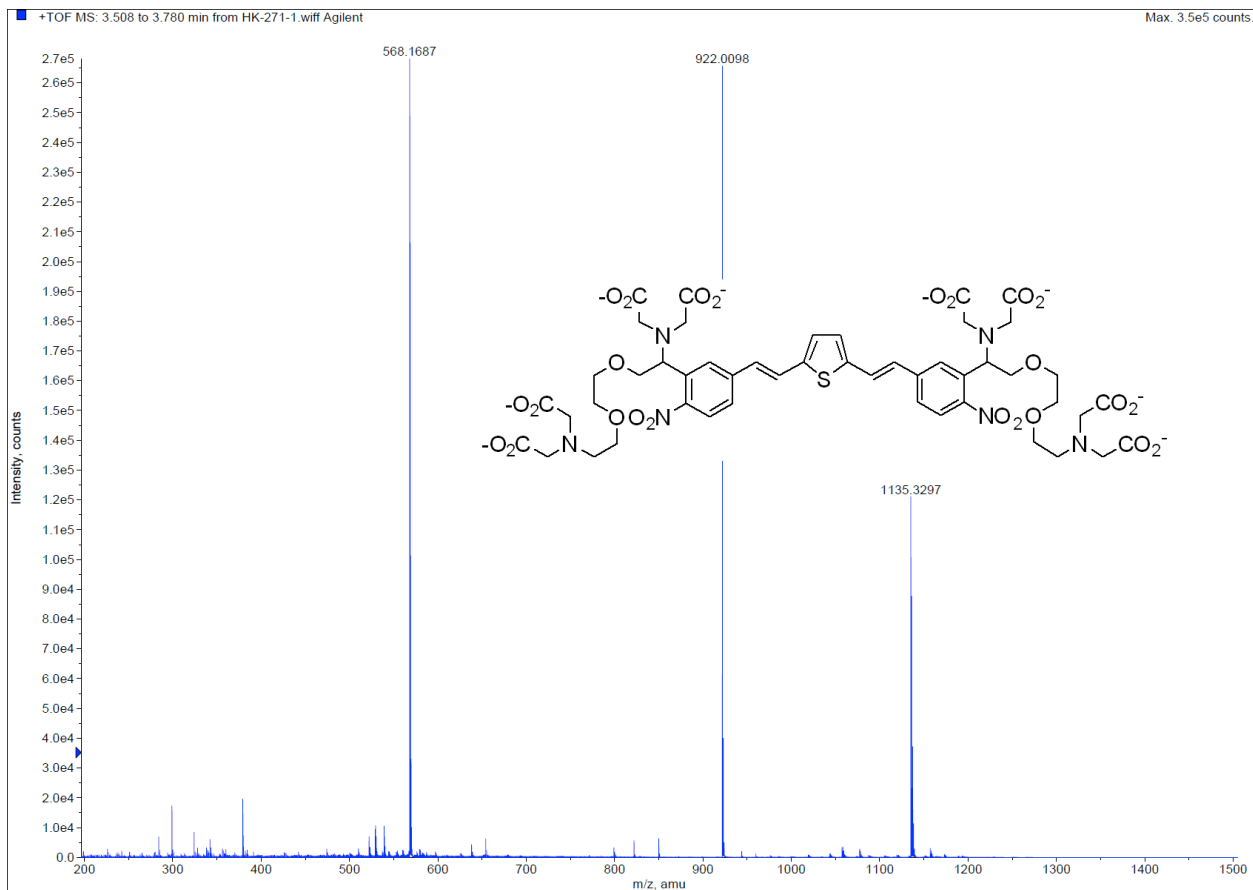

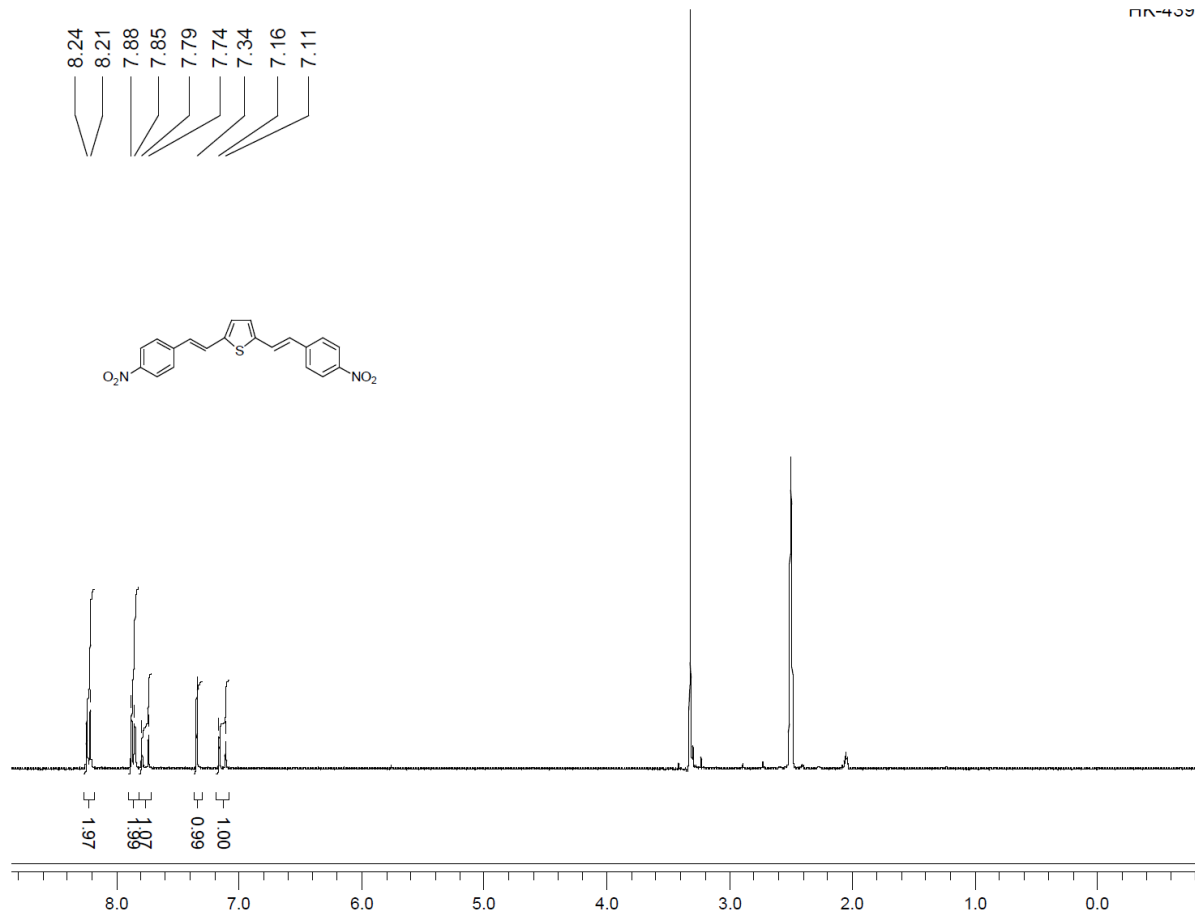

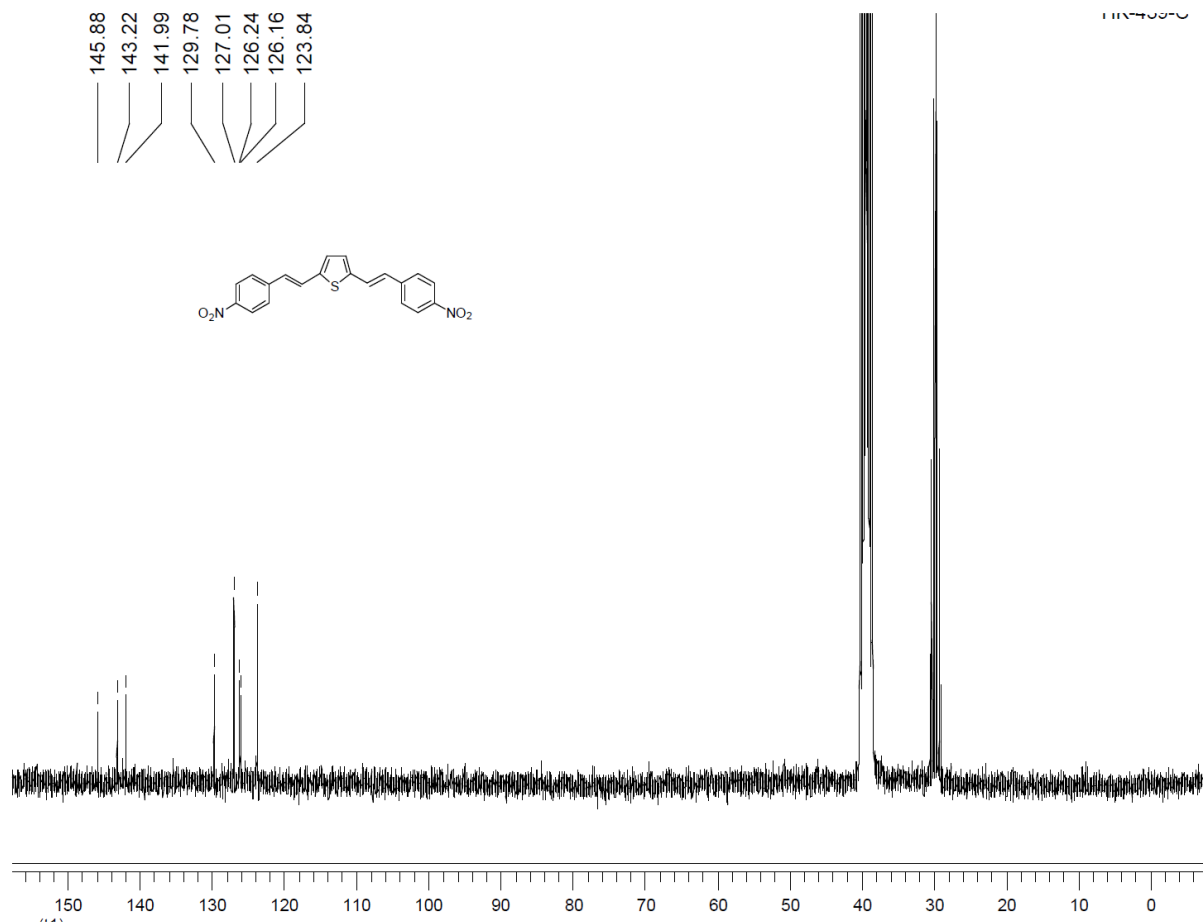

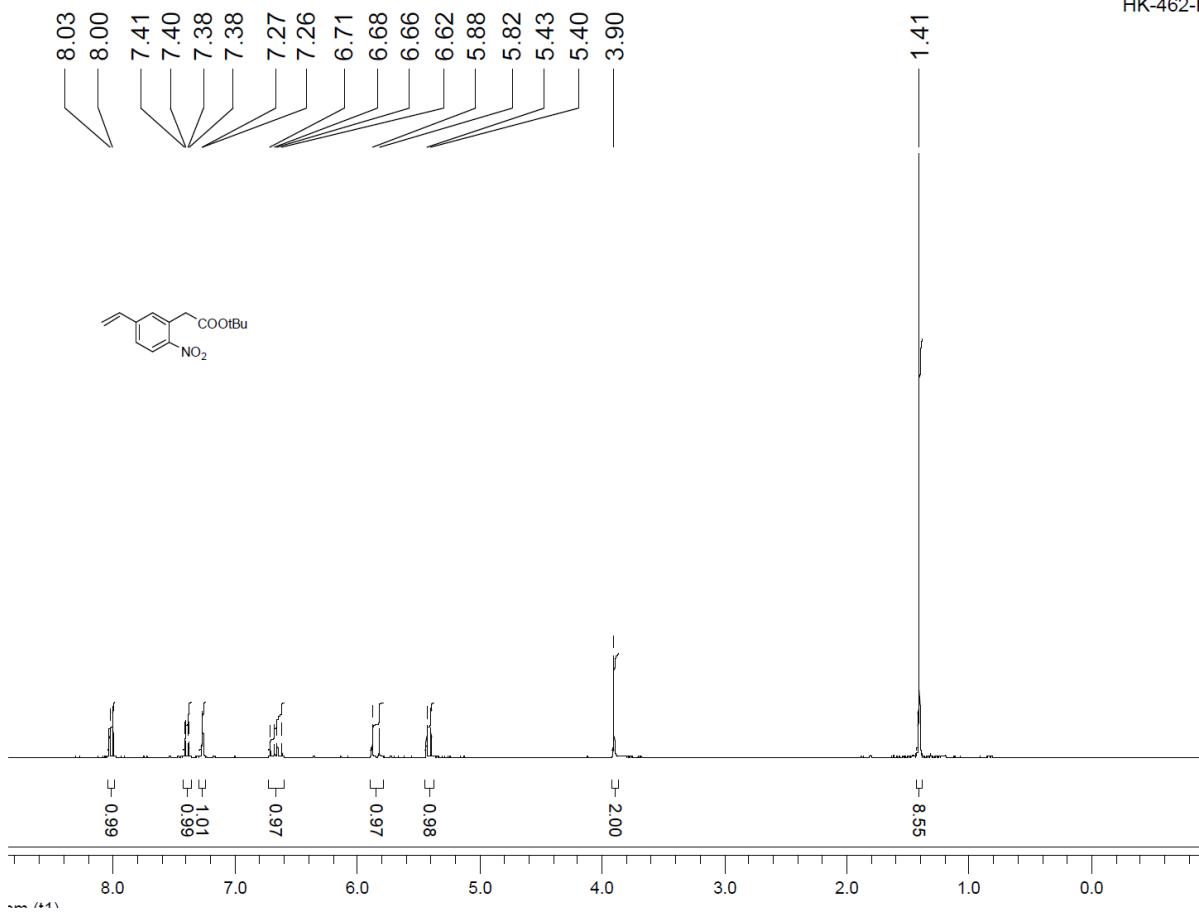

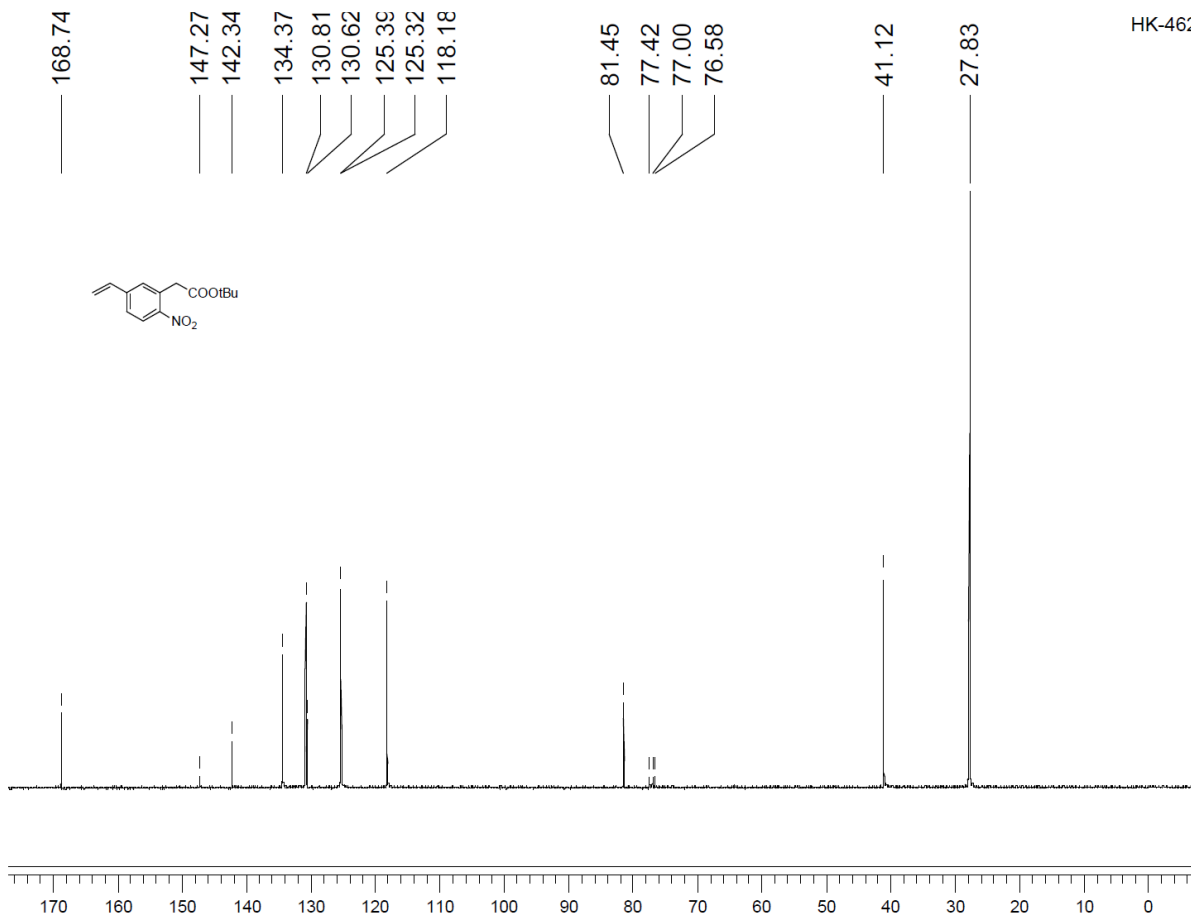

**Compound Table**

| Compound Label      | RT    | Mass     | Abund  | Formula      | Tgt Mass | Diff (ppm) | MFG Formula  | DB Formula   |
|---------------------|-------|----------|--------|--------------|----------|------------|--------------|--------------|
| Cpd 1: C14 H17 N O4 | 7.322 | 263.1158 | 151386 | C14 H17 N O4 | 263.1158 | -0.01      | C14 H17 N O4 | C14 H17 N O4 |

| Compound Label      | m/z      | RT    | Algorithm       | Mass     |
|---------------------|----------|-------|-----------------|----------|
| Cpd 1: C14 H17 N O4 | 286.1050 | 7.322 | Find By Formula | 263.1158 |

MS Spectrum

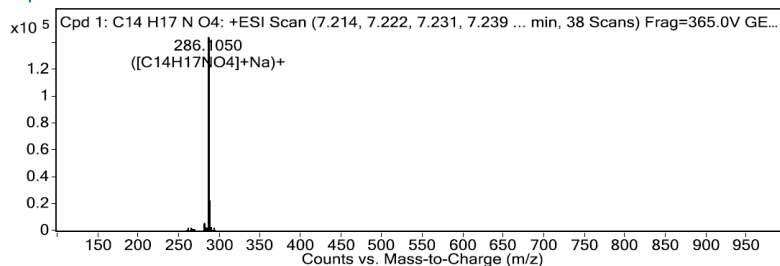

MS Zoomed Spectrum

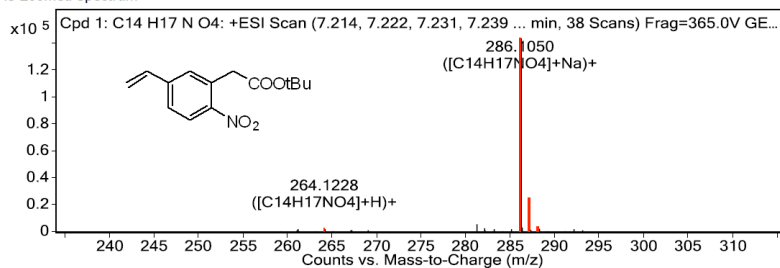



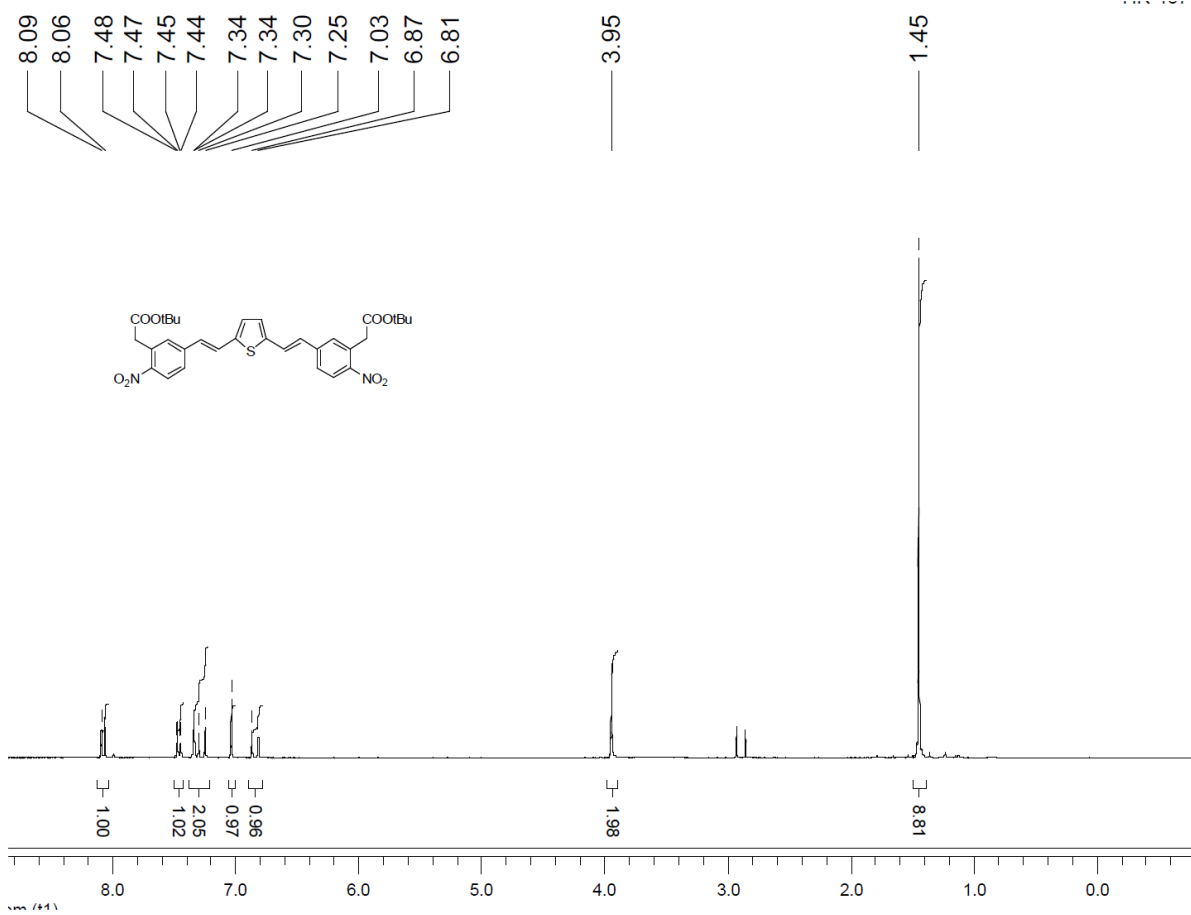

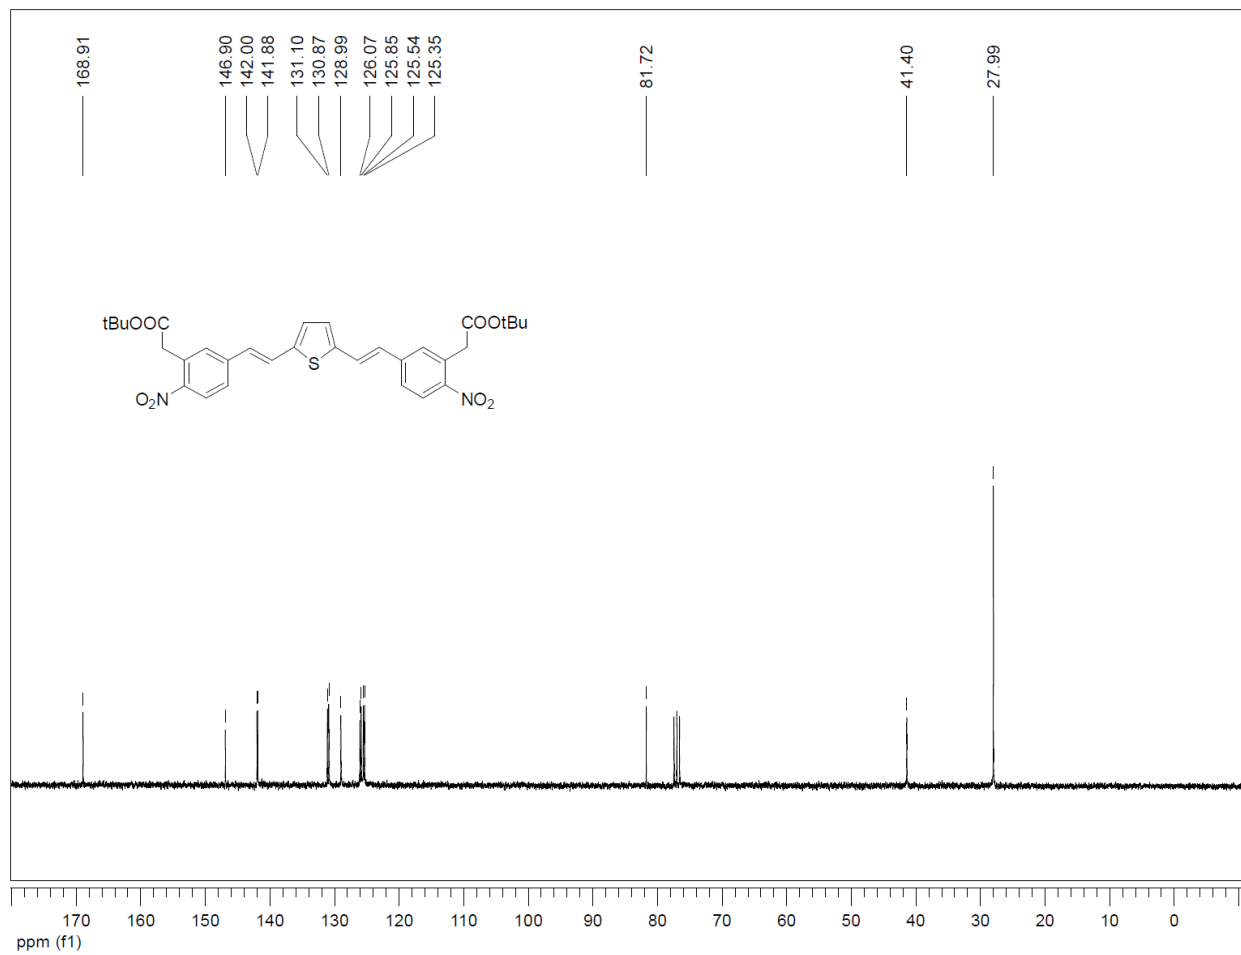

**Compound Table**

| Compound Label         | RT    | Mass     | Abund | Formula         | Tgt Mass | Diff (ppm) | MFG Formula     | DB Formula      |
|------------------------|-------|----------|-------|-----------------|----------|------------|-----------------|-----------------|
| Cpd 1: C32 H34 N2 O8 S | 0.078 | 606.2032 | 12216 | C32 H34 N2 O8 S | 606.2036 | -0.58      | C32 H34 N2 O8 S | C32 H34 N2 O8 S |

| Compound Label         | m/z      | RT    | Algorithm       | Mass     |
|------------------------|----------|-------|-----------------|----------|
| Cpd 1: C32 H34 N2 O8 S | 629.1917 | 0.078 | Find By Formula | 606.2032 |

MS Spectrum

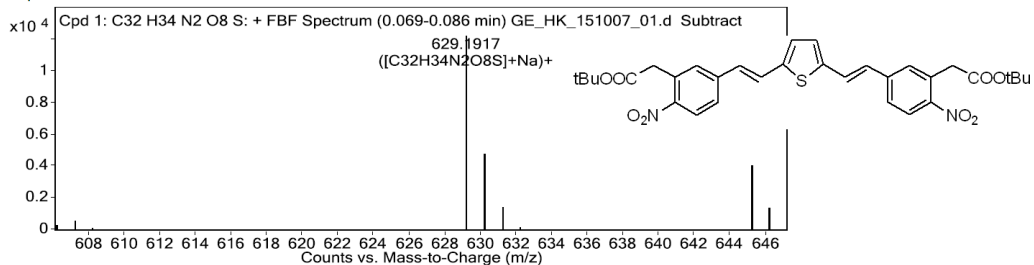

MS Zoomed Spectrum

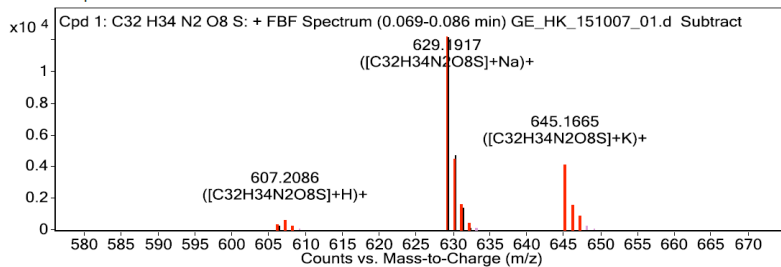

8.12  
8.10  
7.77  
7.76  
7.75  
7.73  
7.73  
7.68  
7.32  
7.08  
7.03

4.01

H

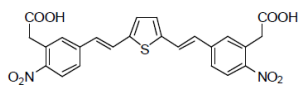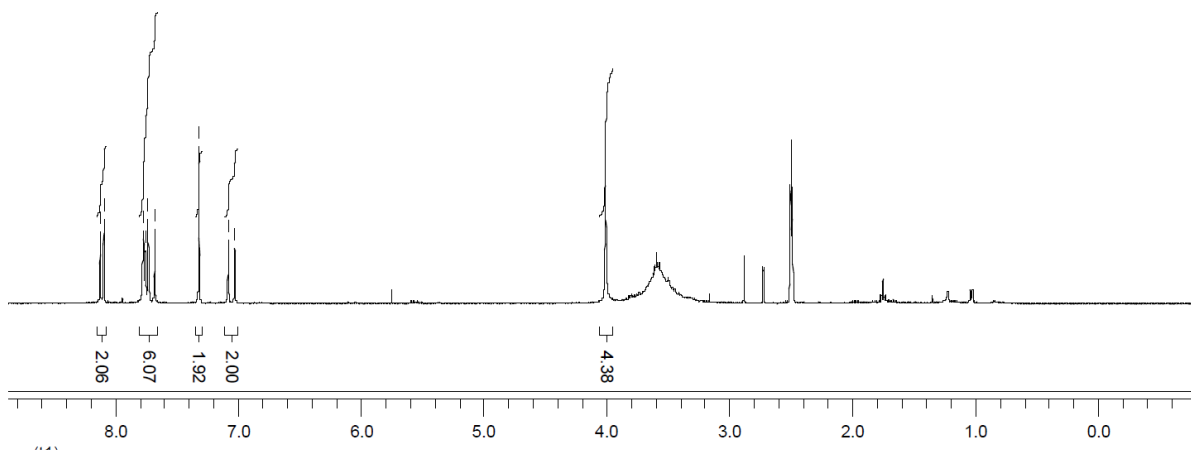

171.0

146.6  
141.9  
141.9  
131.2  
131.0  
129.7  
126.0  
125.9  
125.8  
125.5

40.08  
39.80  
39.52  
39.25  
38.97

13C NMR

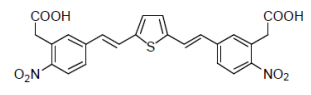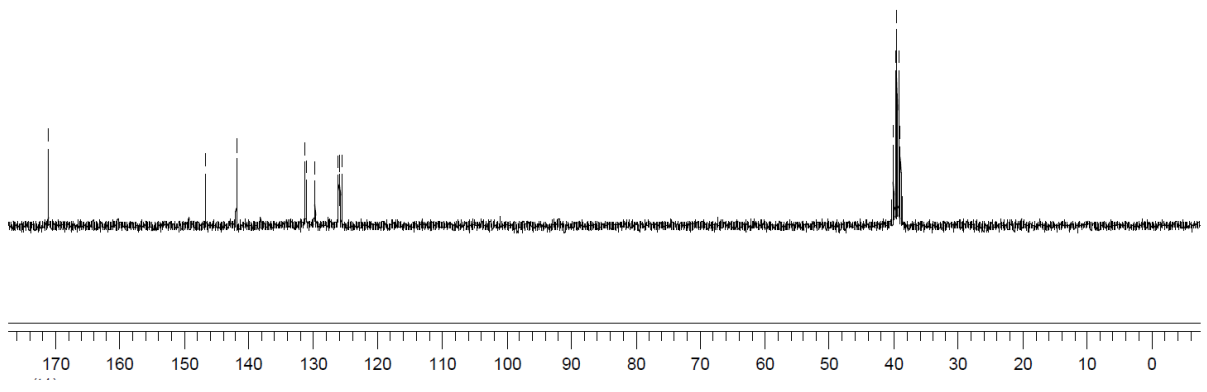

**Compound Table**

| Compound Label                                                         | RT    | Mass     | Abund | Formula                                                         | Tgt Mass | Diff (ppm) | MFG Formula                                                     | DB Formula                                                      |
|------------------------------------------------------------------------|-------|----------|-------|-----------------------------------------------------------------|----------|------------|-----------------------------------------------------------------|-----------------------------------------------------------------|
| Cpd 1: C <sub>24</sub> H <sub>18</sub> N <sub>2</sub> O <sub>8</sub> S | 6.559 | 494.0776 | 18945 | C <sub>24</sub> H <sub>18</sub> N <sub>2</sub> O <sub>8</sub> S | 494.0784 | -1.67      | C <sub>24</sub> H <sub>18</sub> N <sub>2</sub> O <sub>8</sub> S | C <sub>24</sub> H <sub>18</sub> N <sub>2</sub> O <sub>8</sub> S |

| Compound Label                                                         | m/z      | RT    | Algorithm       | Mass     |
|------------------------------------------------------------------------|----------|-------|-----------------|----------|
| Cpd 1: C <sub>24</sub> H <sub>18</sub> N <sub>2</sub> O <sub>8</sub> S | 495.0847 | 6.559 | Find By Formula | 494.0776 |

**MS Spectrum**

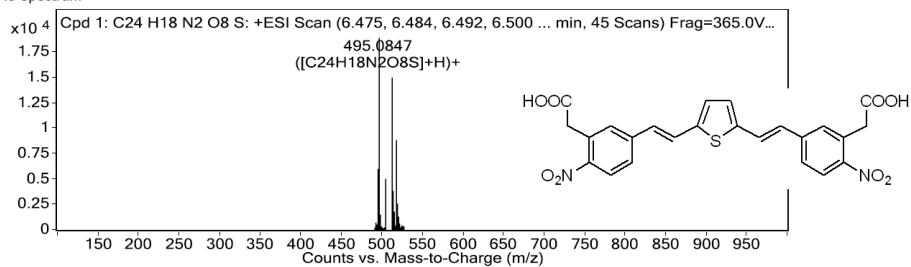

**MS Zoomed Spectrum**

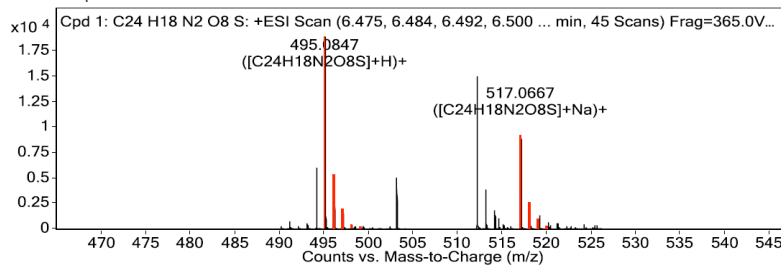

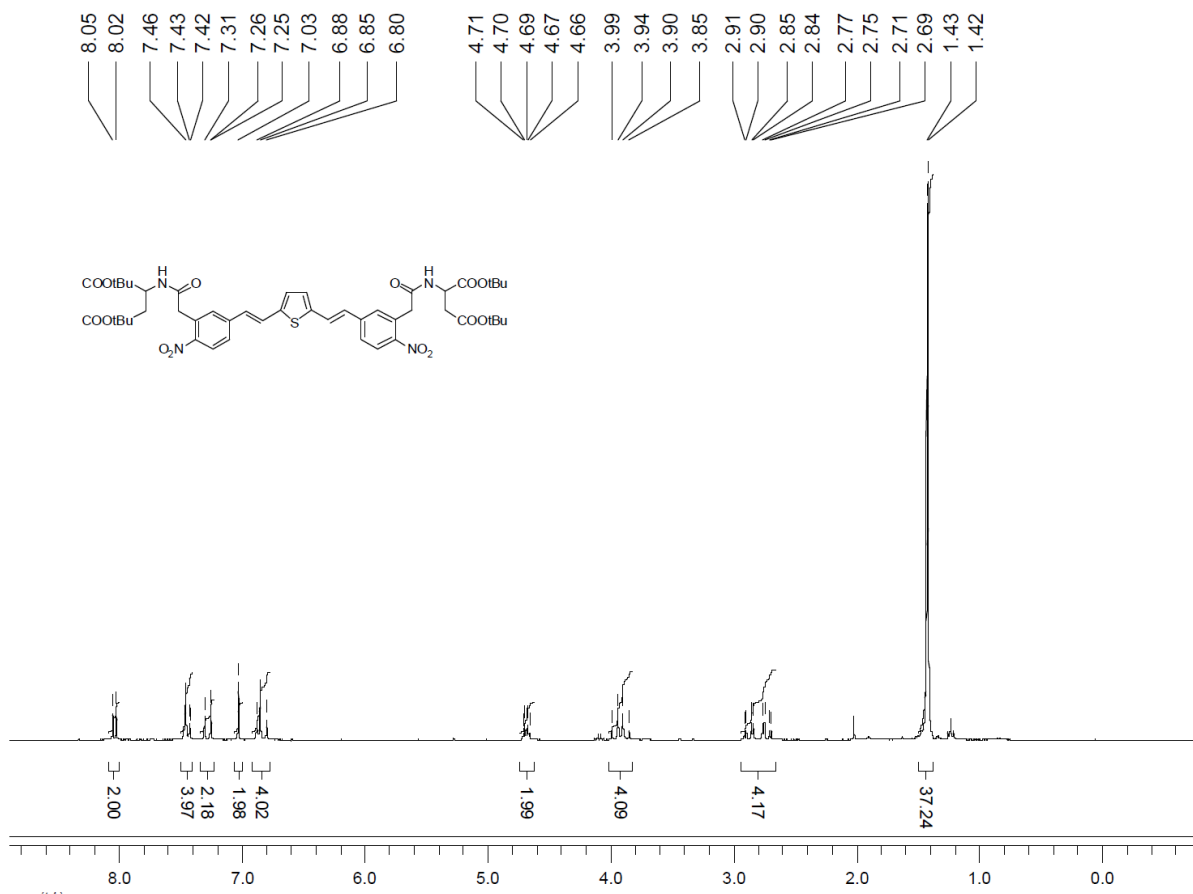

170.02  
169.44  
168.39

146.84  
142.07  
142.03  
130.92  
130.85  
129.06  
125.98  
125.86  
125.73  
125.51

82.22  
81.45

49.33  
41.26  
37.35

28.02  
27.89

HK-51

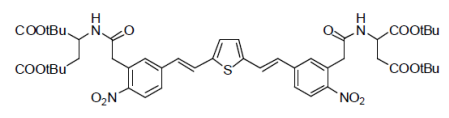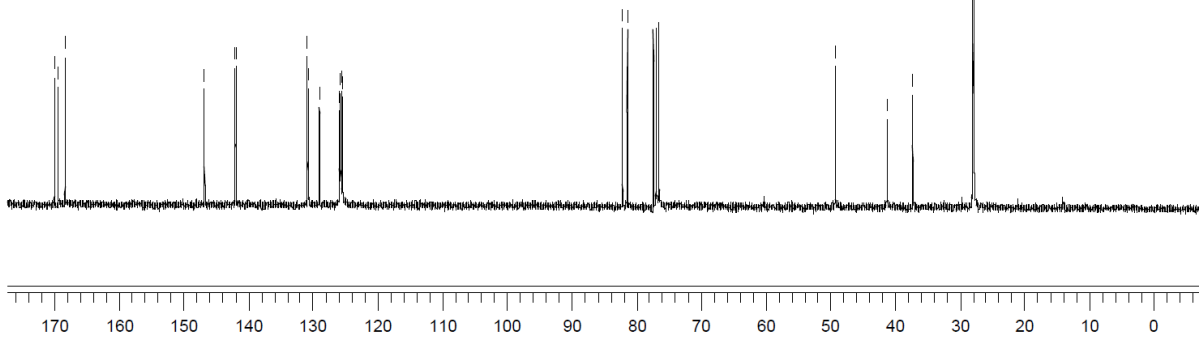



**Compound Table**

| Compound Label          | RT    | Mass     | Abund  | Formula          | Tgt Mass | Diff (ppm) | MFG Formula      | DB Formula       |
|-------------------------|-------|----------|--------|------------------|----------|------------|------------------|------------------|
| Cpd 1: C48 H60 N4 O14 S | 0.379 | 948.3822 | 143198 | C48 H60 N4 O14 S | 948.3827 | -0.48      | C48 H60 N4 O14 S | C48 H60 N4 O14 S |

| Compound Label          | m/z      | RT    | Algorithm       | Mass     |
|-------------------------|----------|-------|-----------------|----------|
| Cpd 1: C48 H60 N4 O14 S | 971.3721 | 0.379 | Find By Formula | 948.3822 |

MS Spectrum

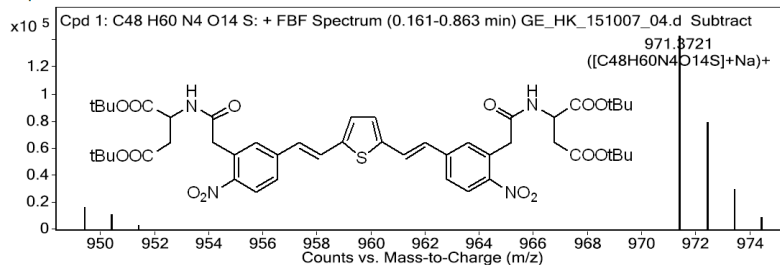

MS Zoomed Spectrum

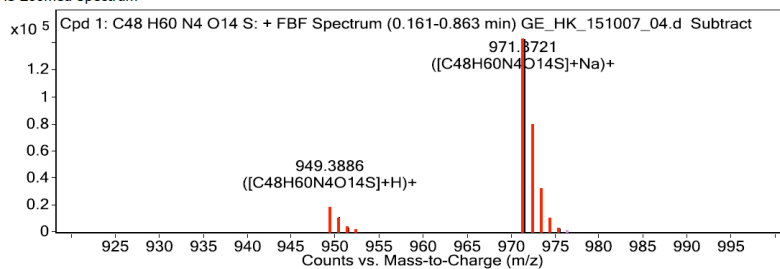

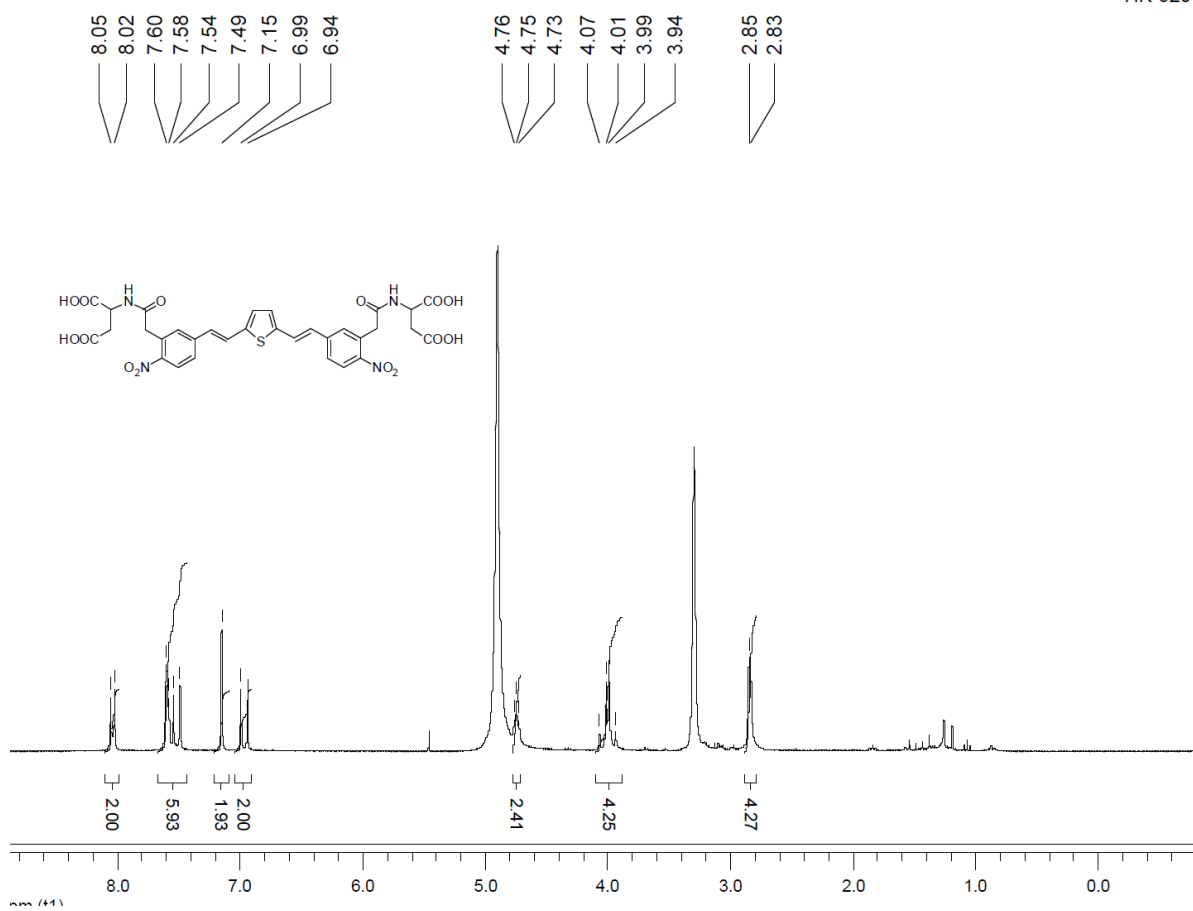

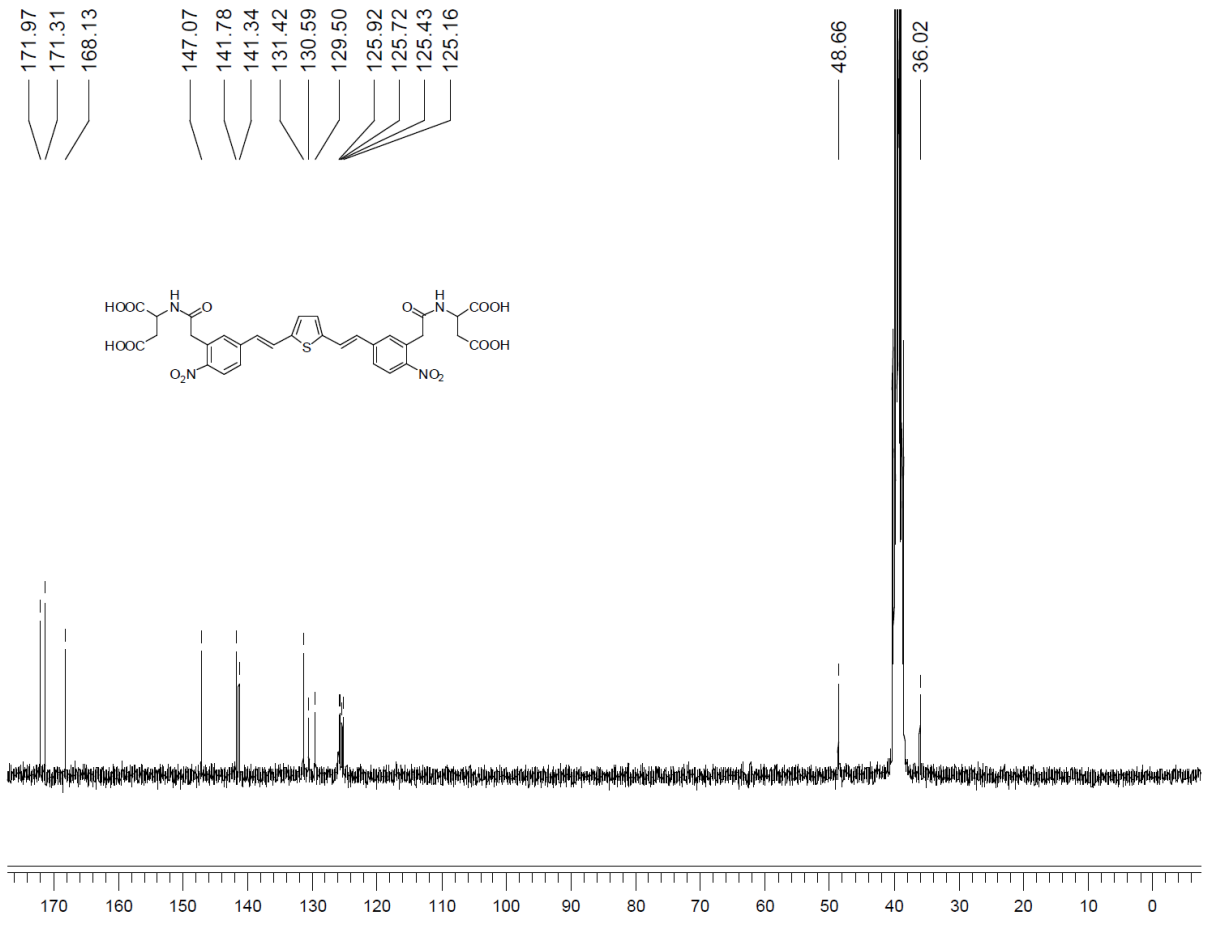

**Compound Table**

| Compound Label          | RT    | Mass     | Abund  | Formula          | Tgt Mass | Diff (ppm) | MFG Formula      | DB Formula       |
|-------------------------|-------|----------|--------|------------------|----------|------------|------------------|------------------|
| Cpd 1: C32 H28 N4 O14 S | 5.317 | 724.1322 | 350154 | C32 H28 N4 O14 S | 724.1323 | -0.05      | C32 H28 N4 O14 S | C32 H28 N4 O14 S |

| Compound Label          | m/z      | RT    | Algorithm       | Mass     |
|-------------------------|----------|-------|-----------------|----------|
| Cpd 1: C32 H28 N4 O14 S | 725.1395 | 5.317 | Find By Formula | 724.1322 |

MS Spectrum

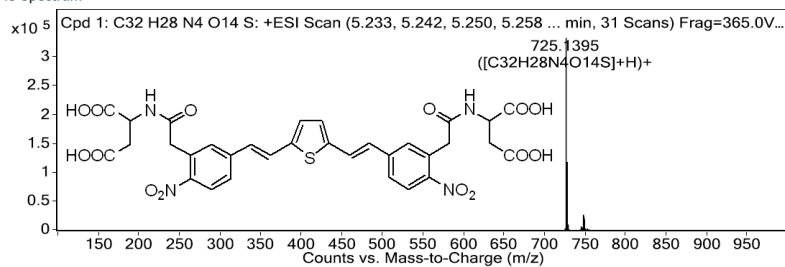

MS Zoomed Spectrum

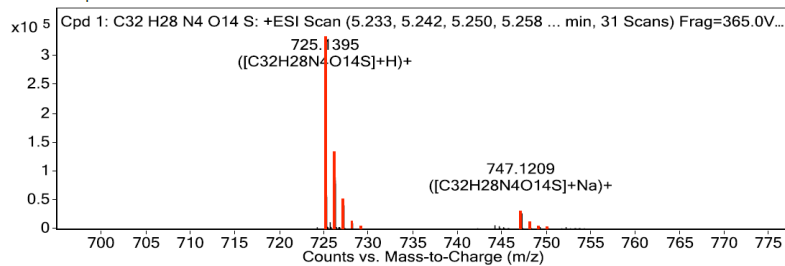

8.19  
8.19  
8.16  
7.55  
7.53  
7.52  
7.26  
7.21  
6.99  
6.98  
6.90  
6.88  
6.83  
6.77

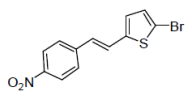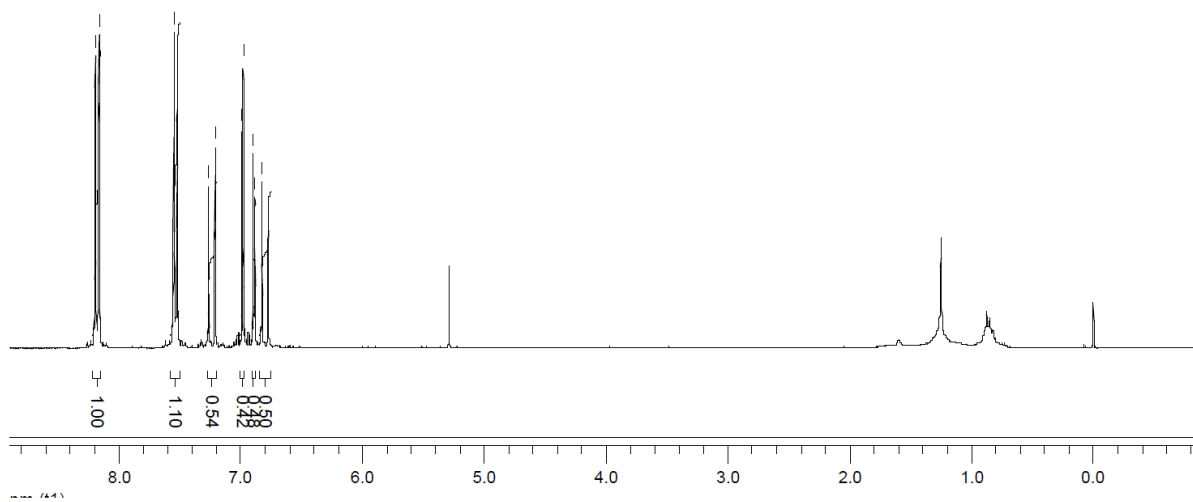

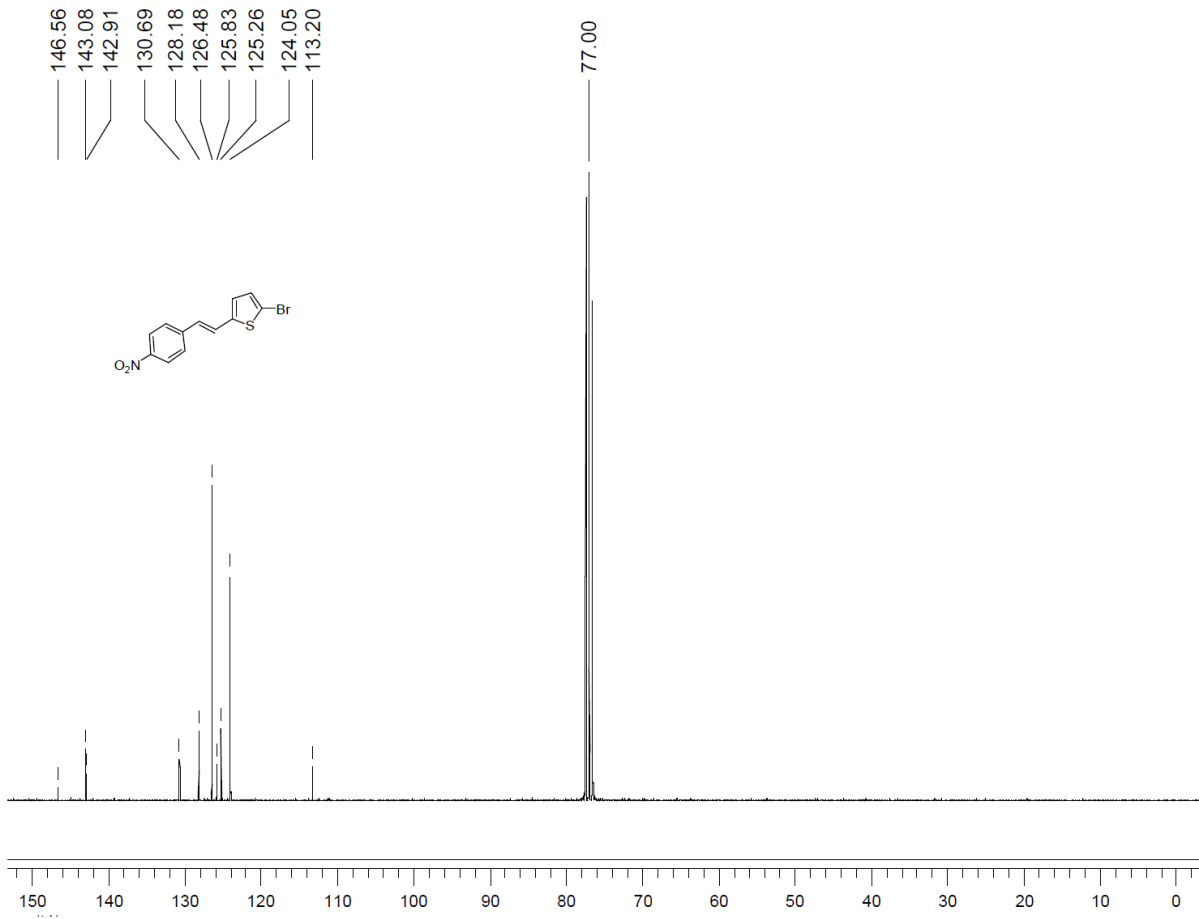

**Compound Table**

| Compound Label          | RT    | Mass     | Abund | Formula          | Tgt Mass | Diff (ppm) | MFG Formula      | DB Formula       |
|-------------------------|-------|----------|-------|------------------|----------|------------|------------------|------------------|
| Cpd 1: C12 H8 Br N O2 S | 0.091 | 308.9457 | 11036 | C12 H8 Br N O2 S | 308.9459 | -0.77      | C12 H8 Br N O2 S | C12 H8 Br N O2 S |

| Compound Label          | m/z      | RT    | Algorithm       | Mass     |
|-------------------------|----------|-------|-----------------|----------|
| Cpd 1: C12 H8 Br N O2 S | 309.9532 | 0.091 | Find By Formula | 308.9457 |

MS Spectrum

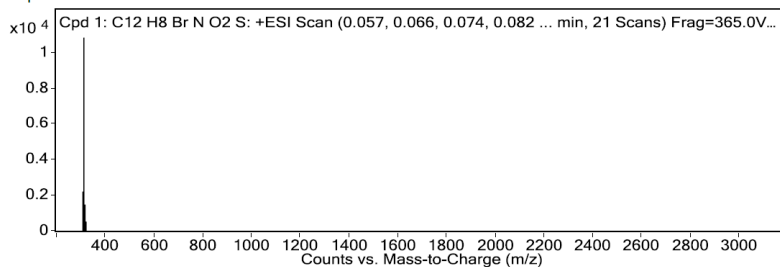

MS Zoomed Spectrum

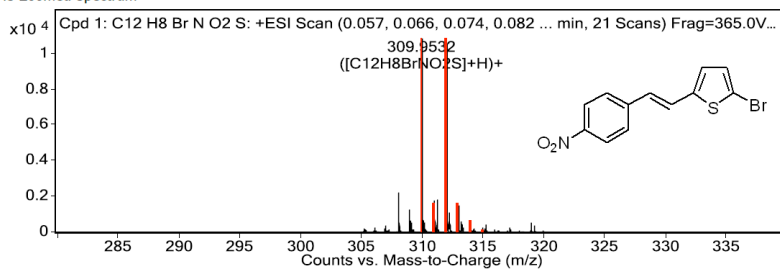

8.20  
8.17  
7.56  
7.53  
7.33  
7.28  
7.02  
7.01  
6.90  
6.88  
6.84  
6.82  
6.78  
6.76  
6.73  
5.63  
5.57  
5.23  
5.20

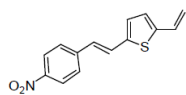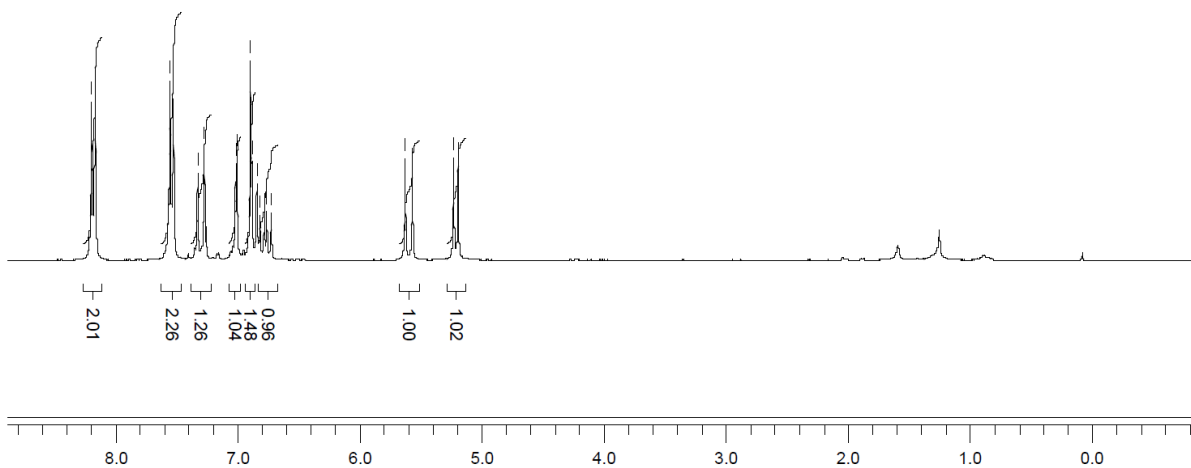



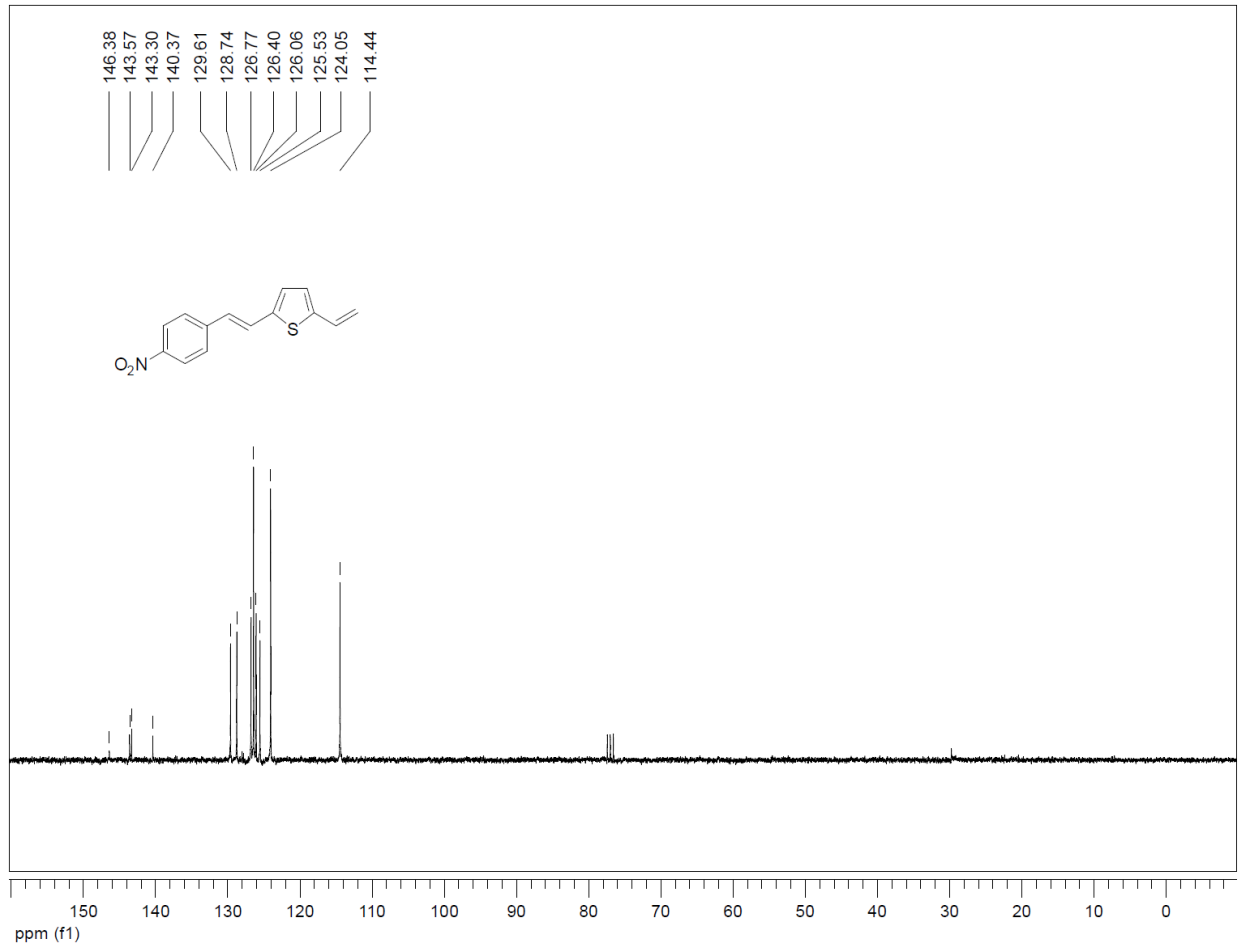

**Compound Table**

| Compound Label        | RT    | Mass     | Abund | Formula        | Tgt Mass | Diff (ppm) | MFG Formula    | DB Formula     |
|-----------------------|-------|----------|-------|----------------|----------|------------|----------------|----------------|
| Cpd 1: C14 H11 N O2 S | 0.097 | 257.0512 | 16448 | C14 H11 N O2 S | 257.051  | 0.42       | C14 H11 N O2 S | C14 H11 N O2 S |

| Compound Label        | m/z      | RT    | Algorithm       | Mass     |
|-----------------------|----------|-------|-----------------|----------|
| Cpd 1: C14 H11 N O2 S | 258.0584 | 0.097 | Find By Formula | 257.0512 |

MS Spectrum

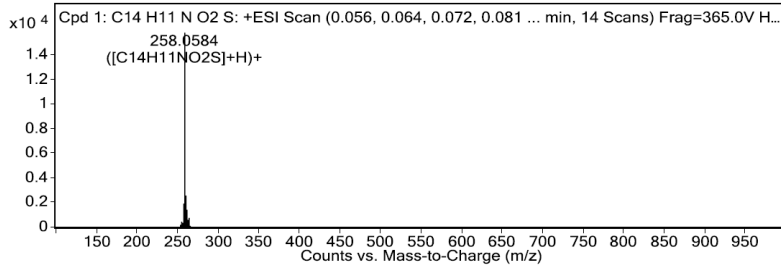

MS Zoomed Spectrum

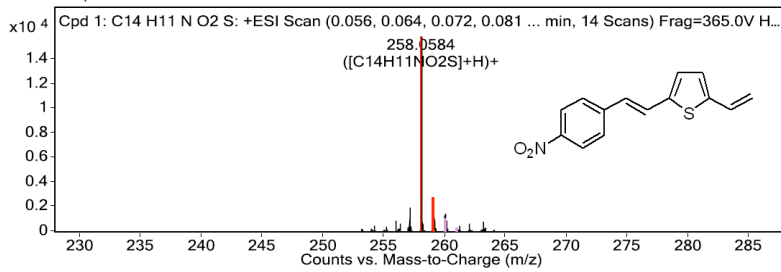

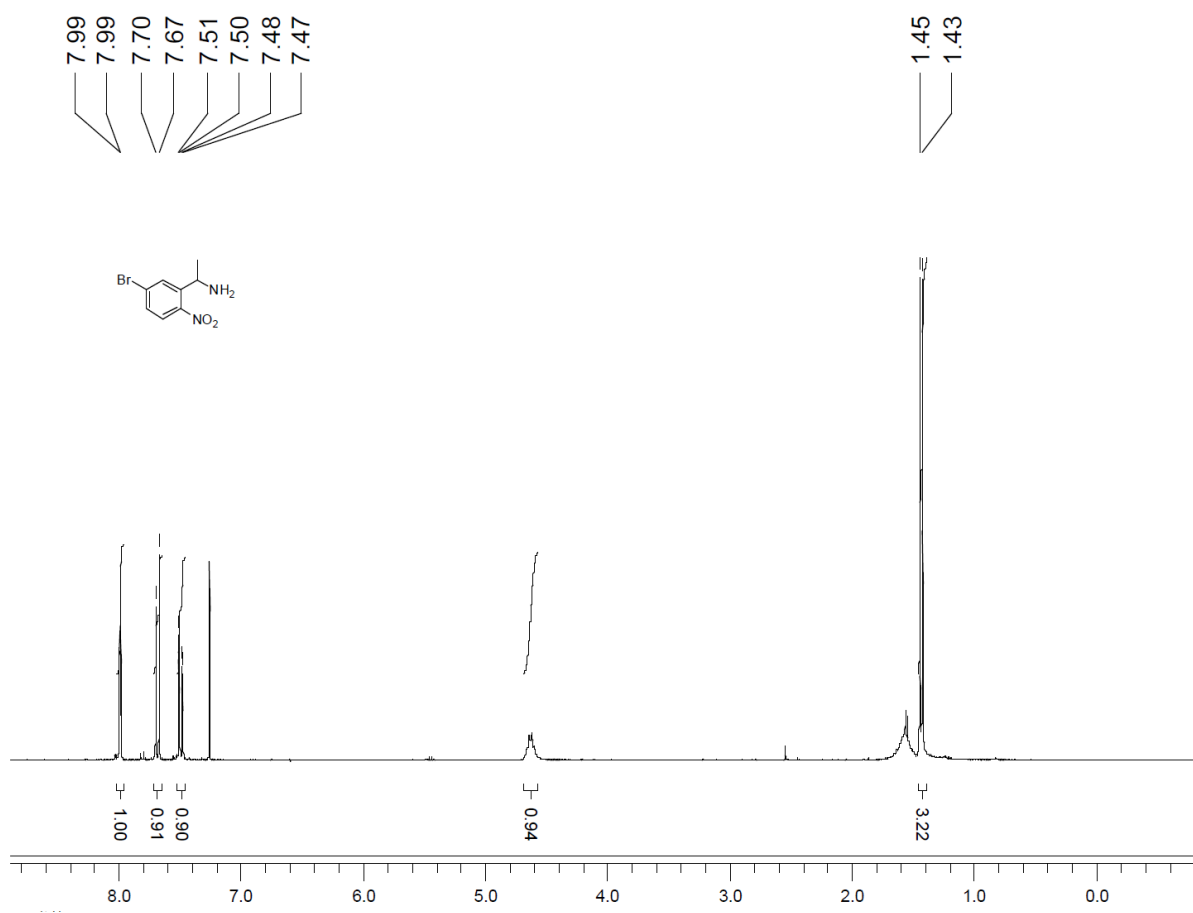

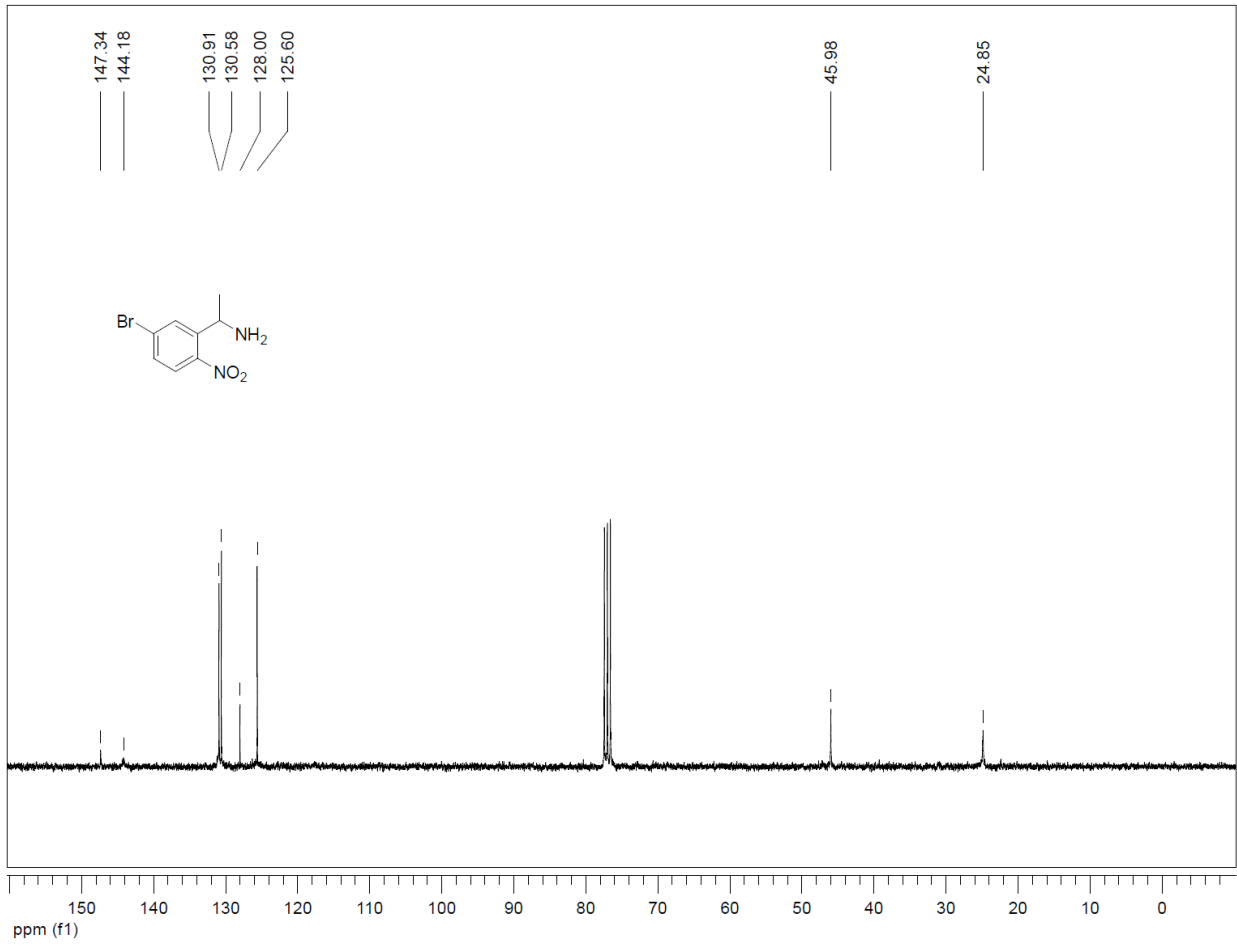

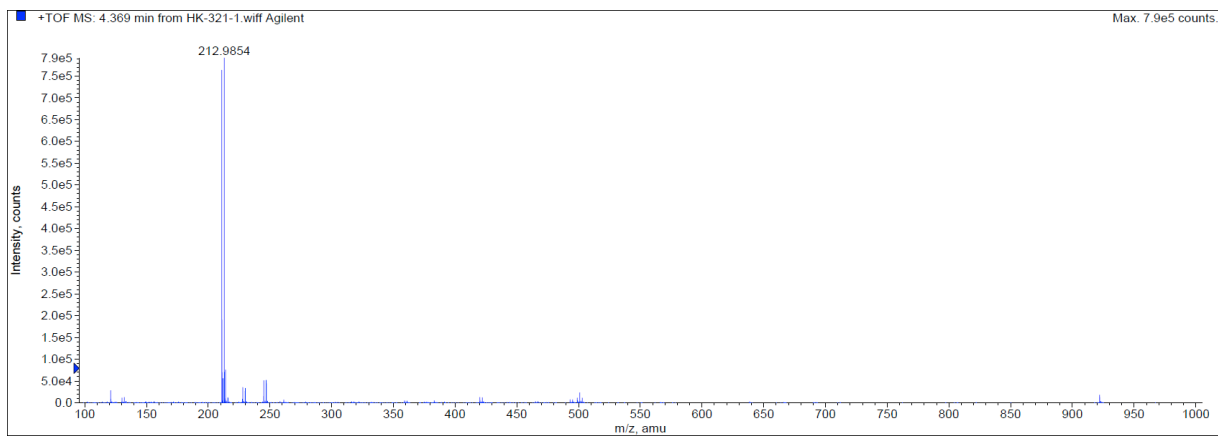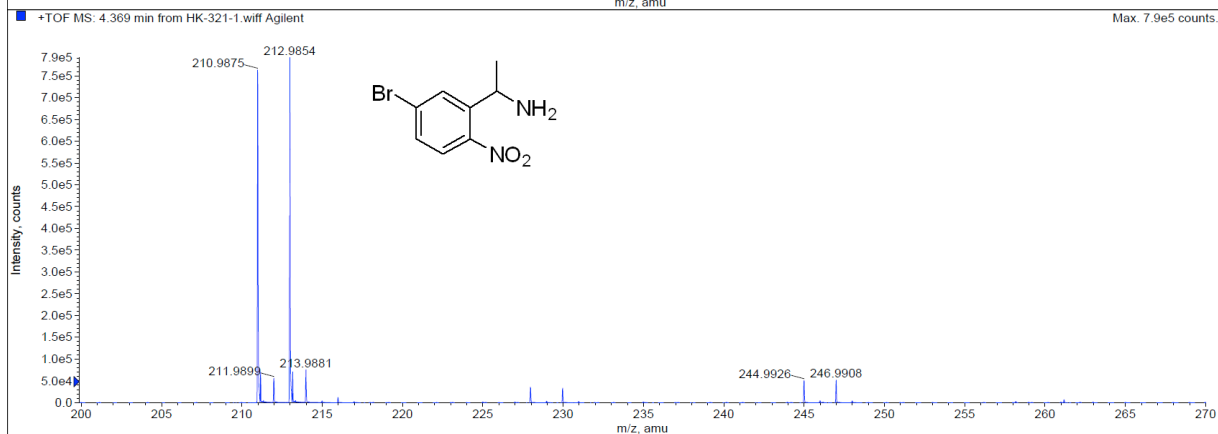

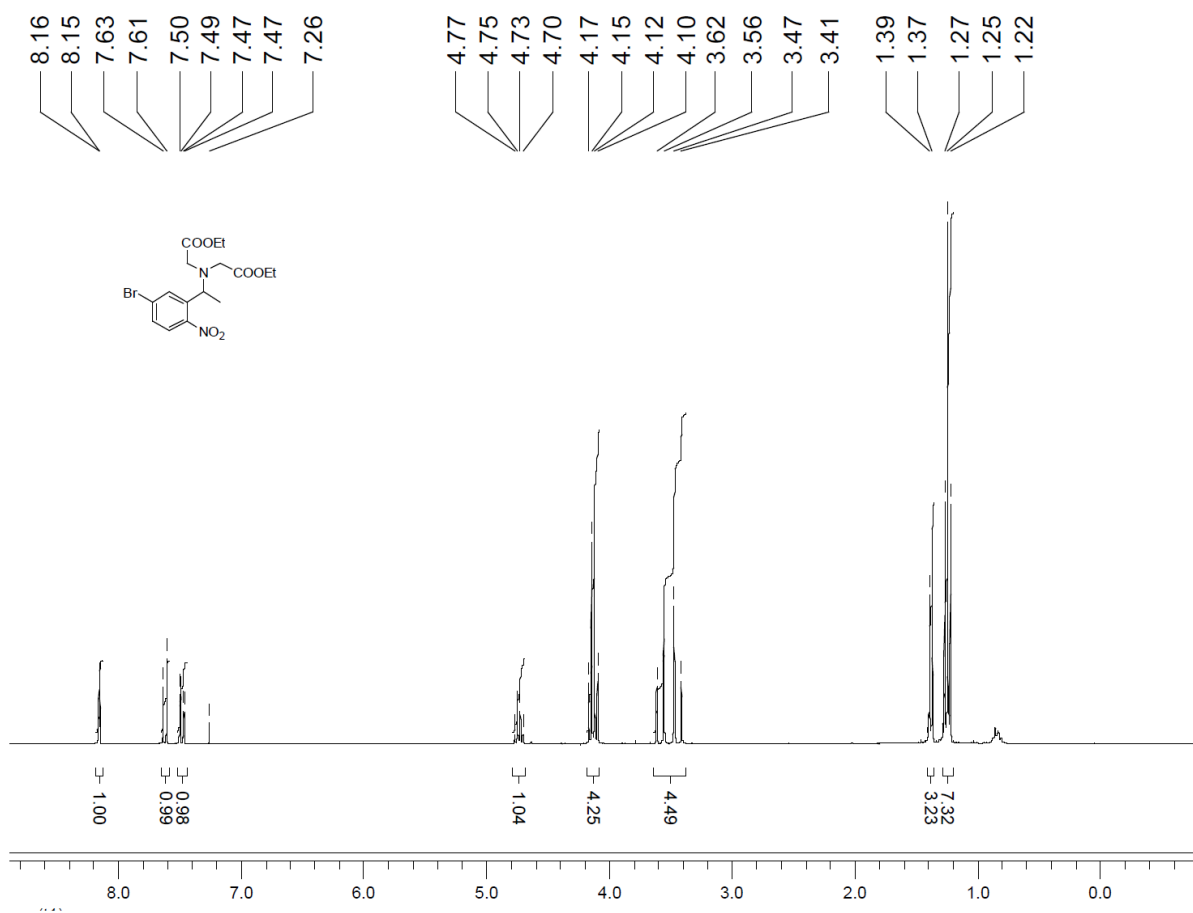

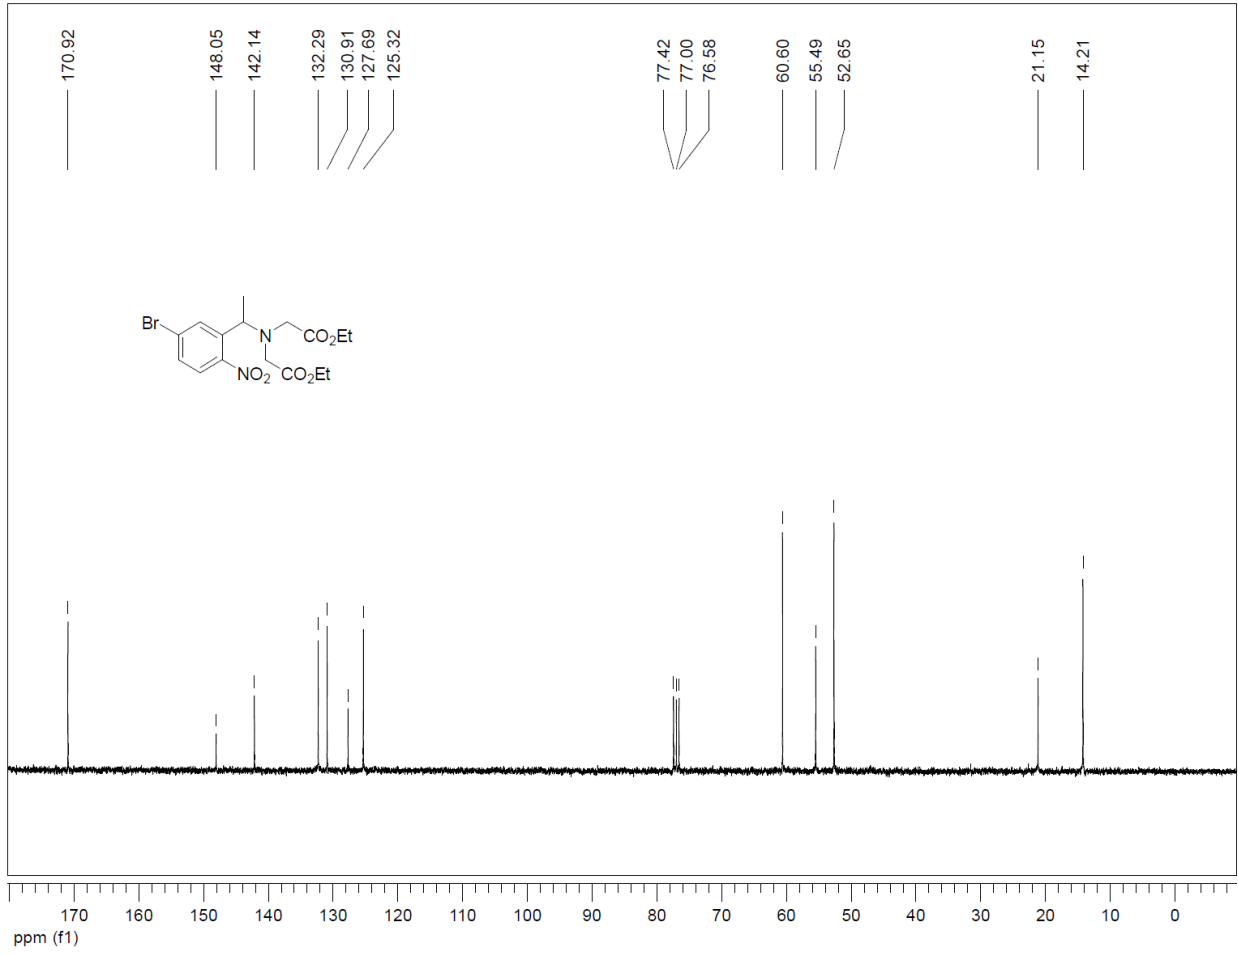

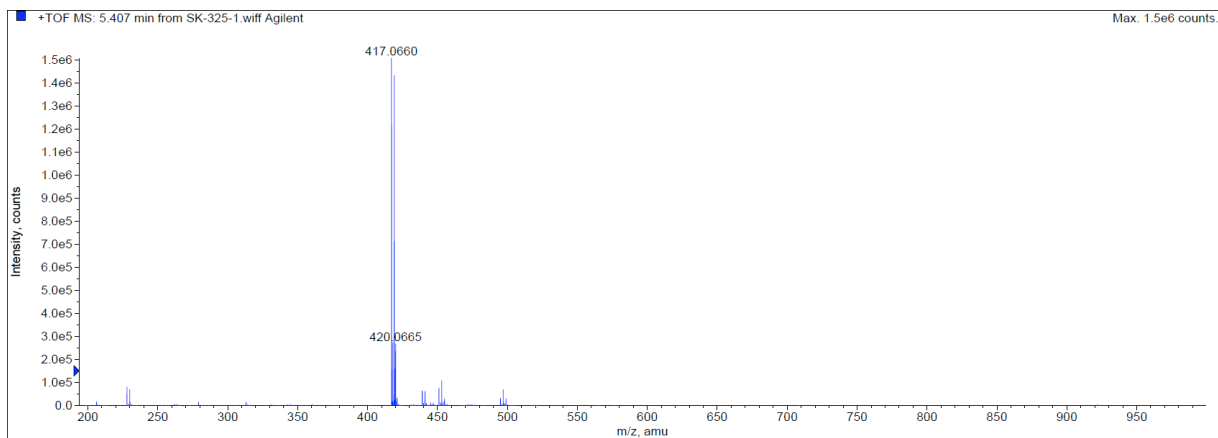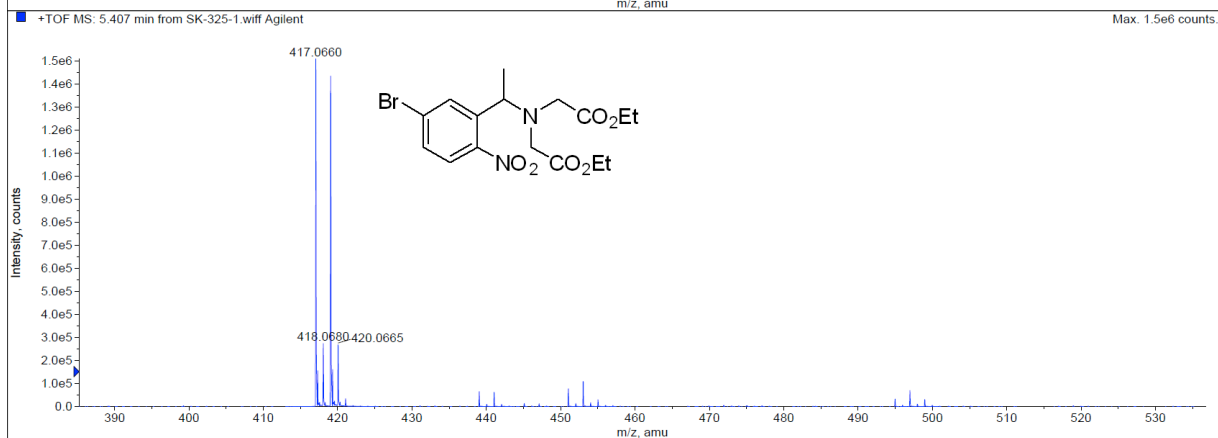



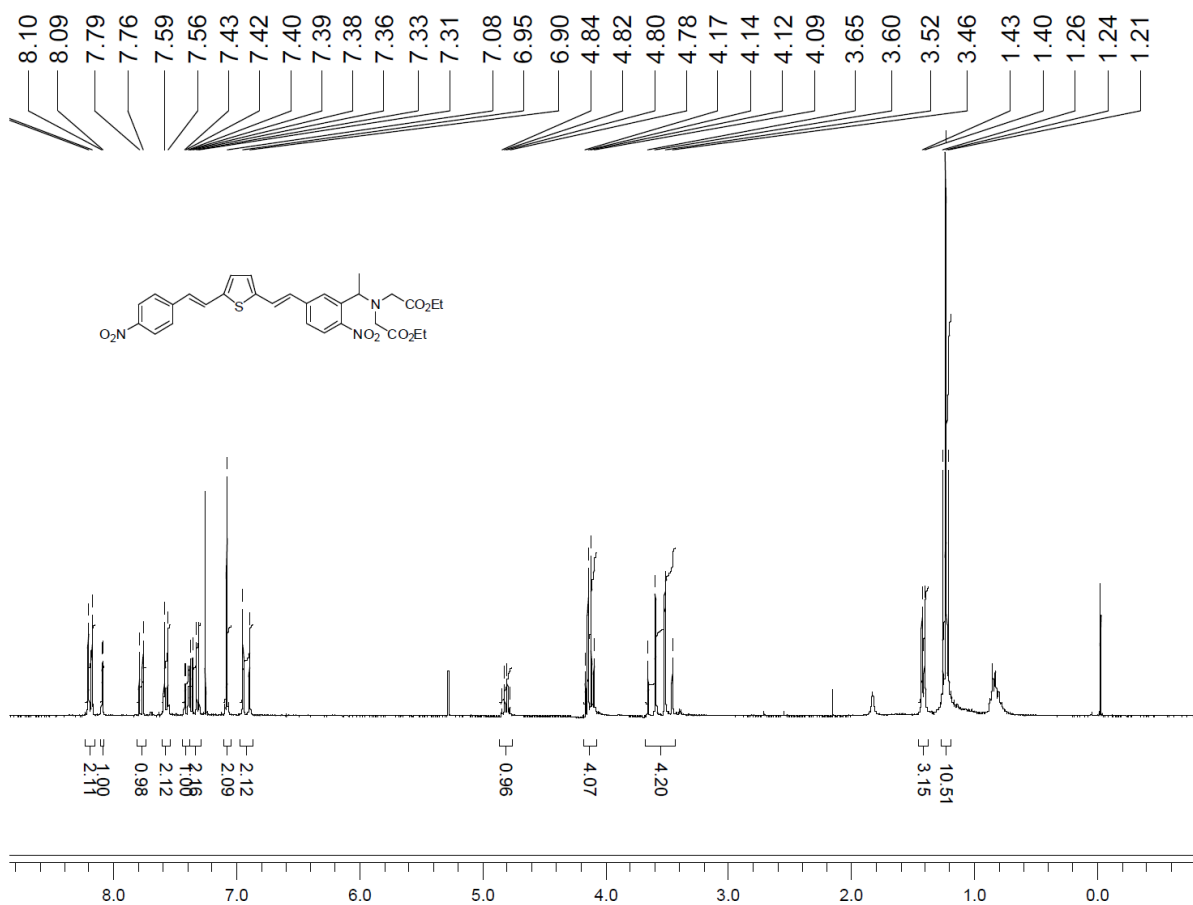

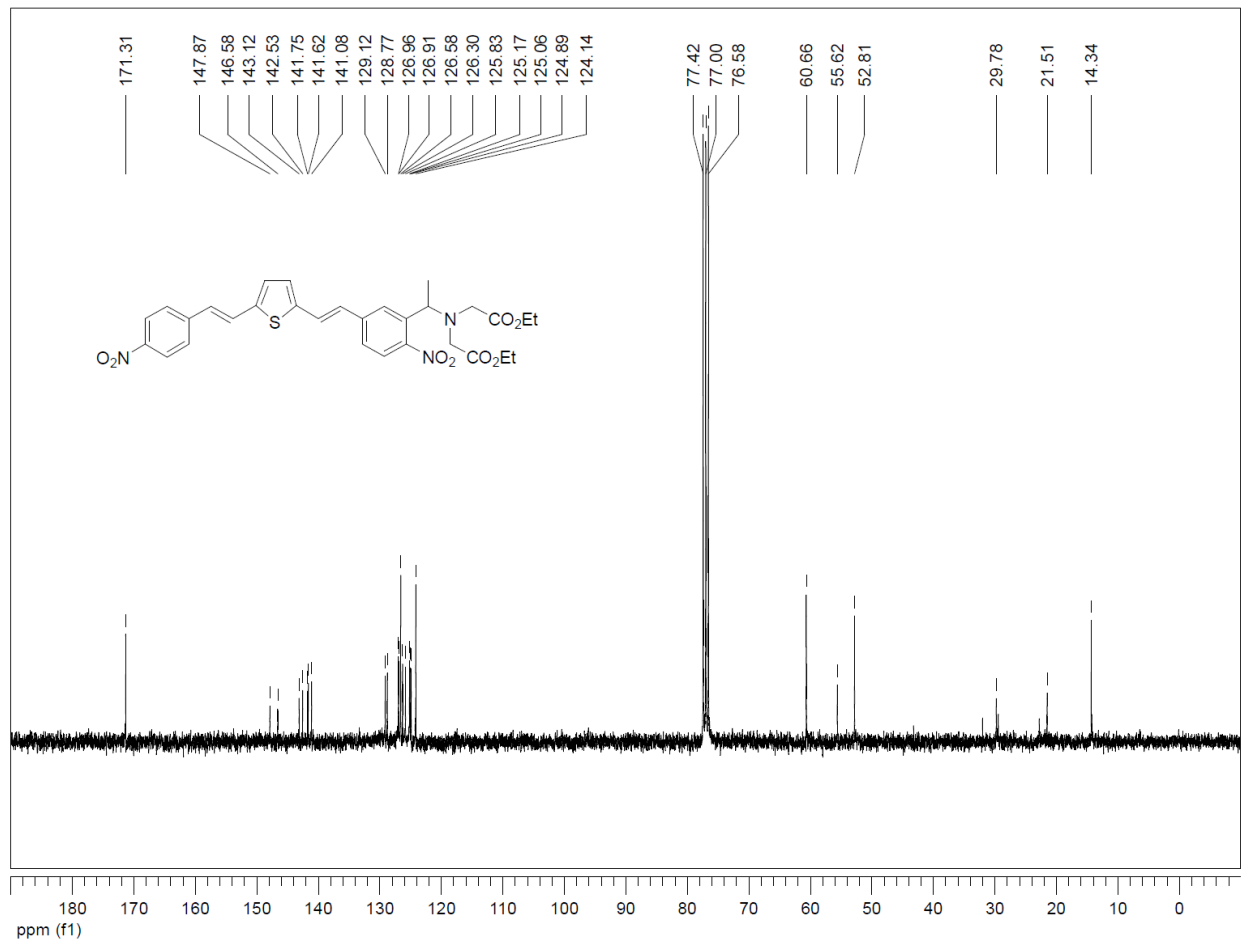

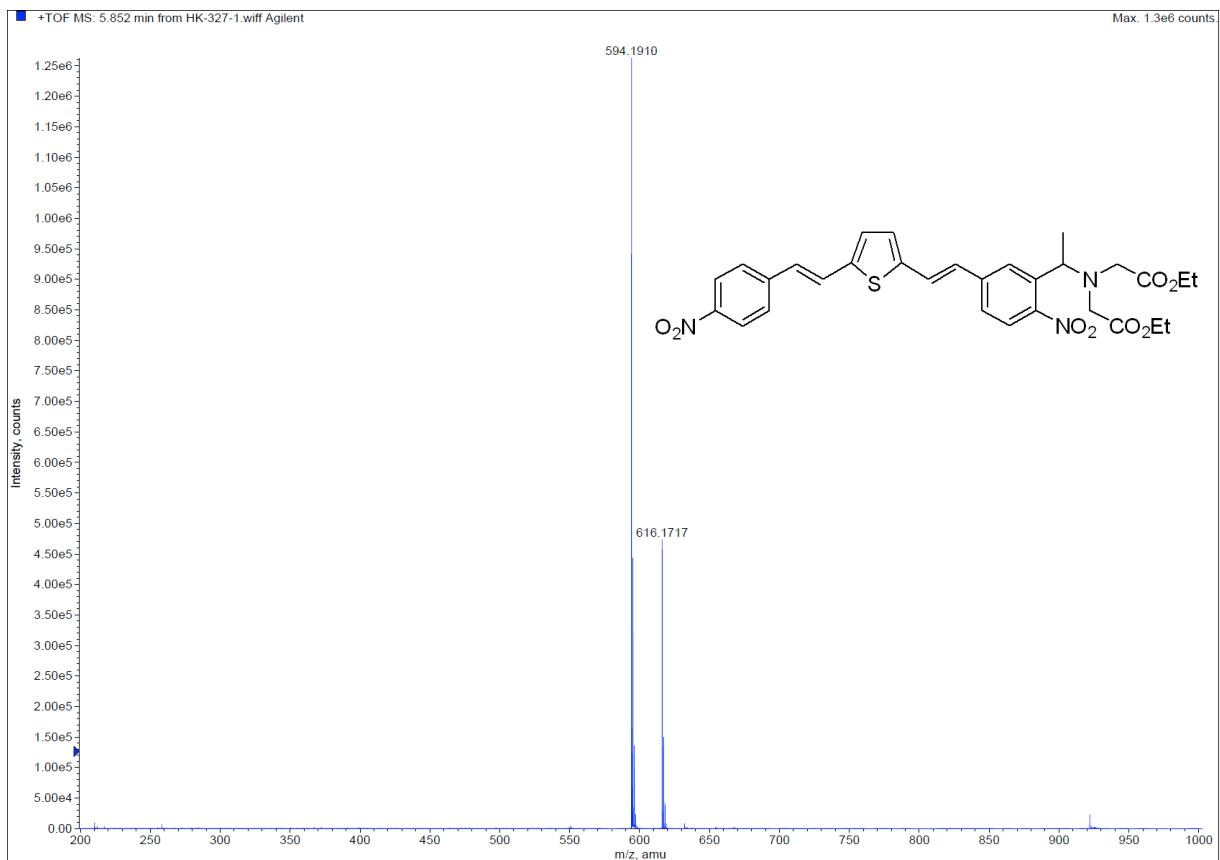

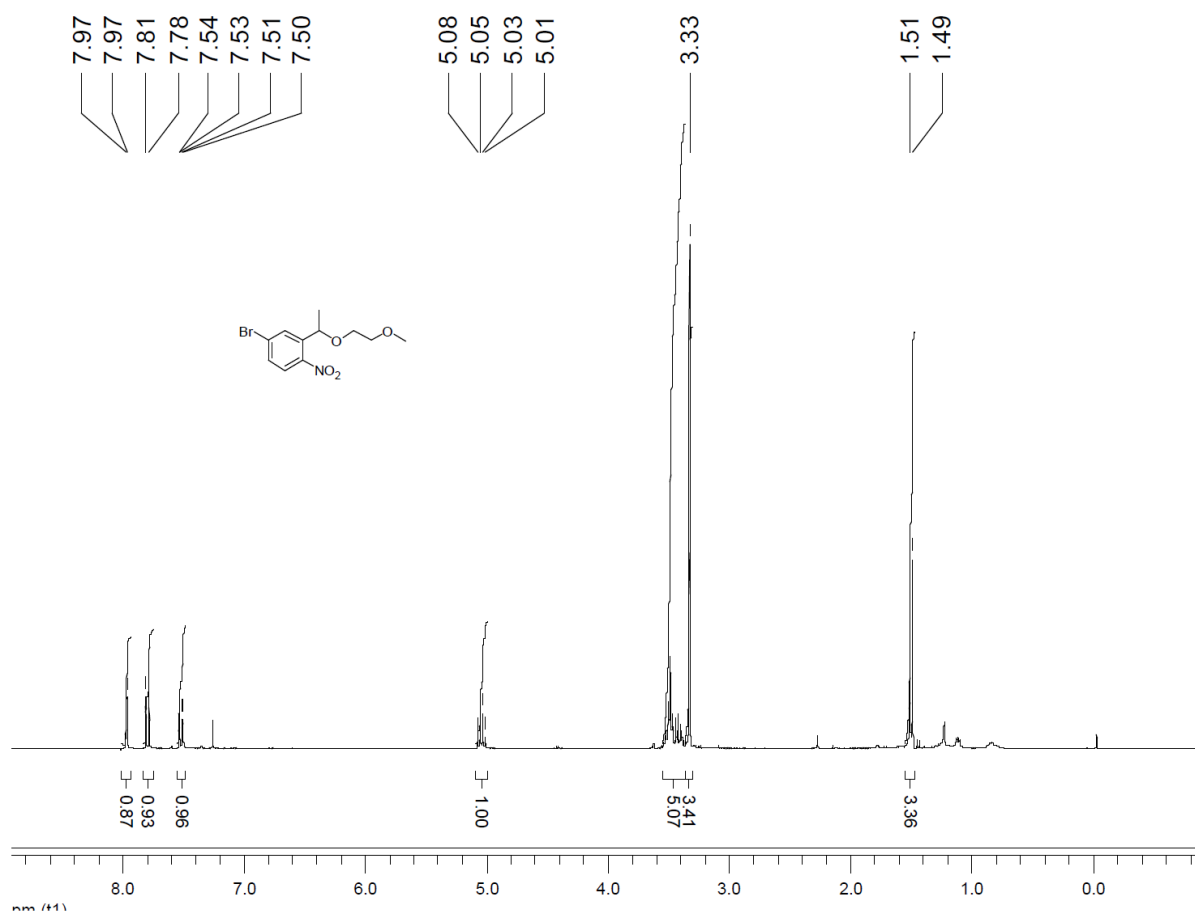

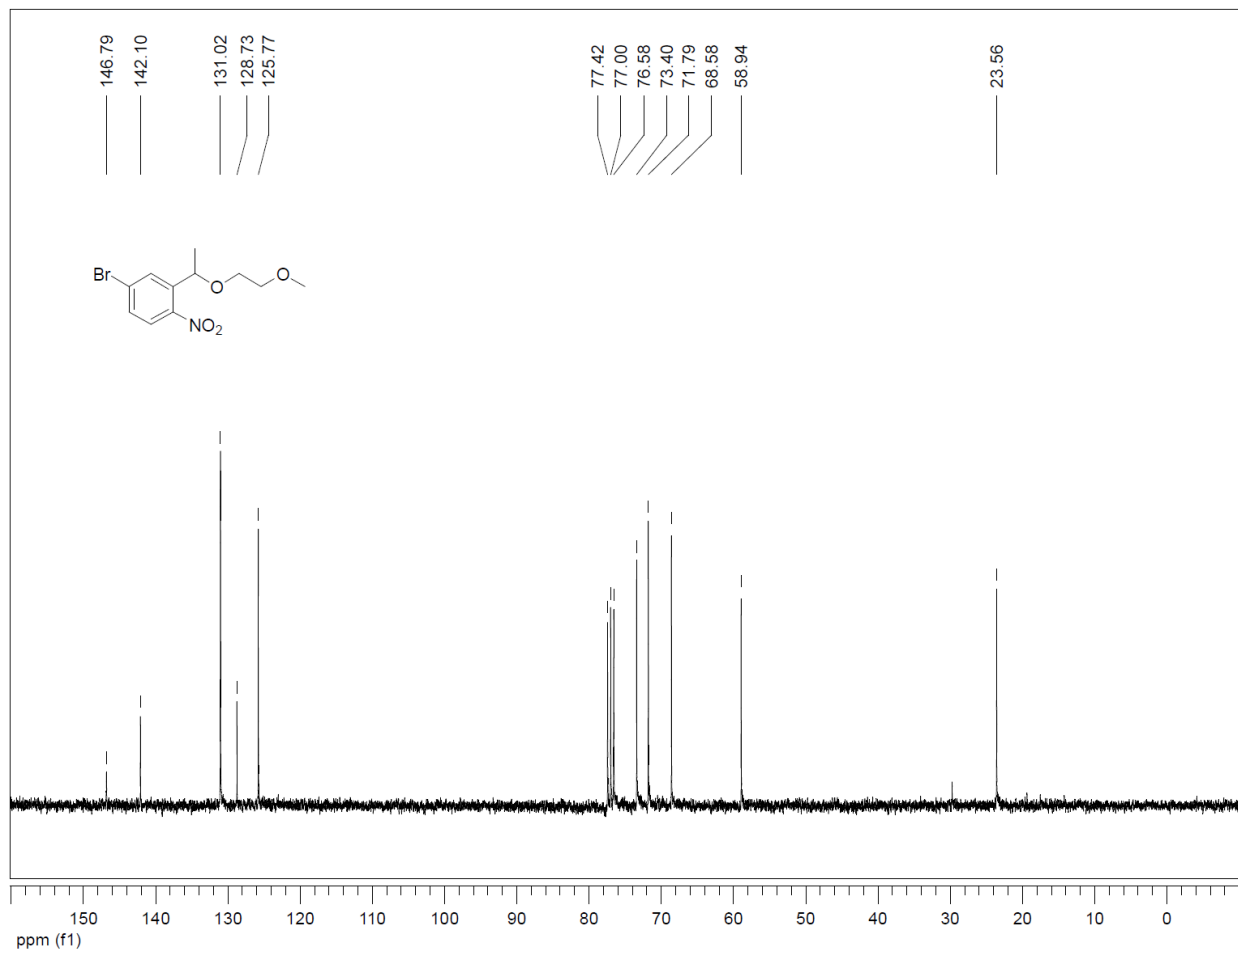

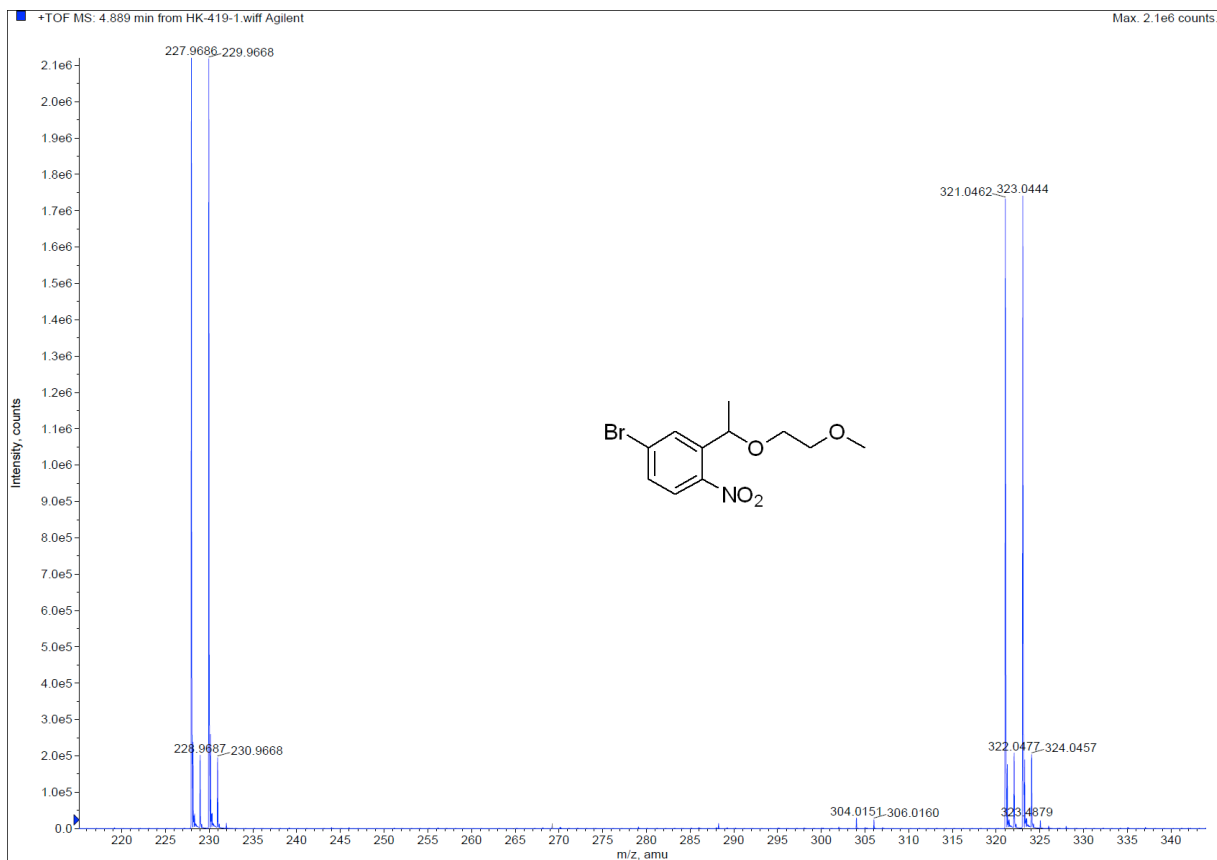

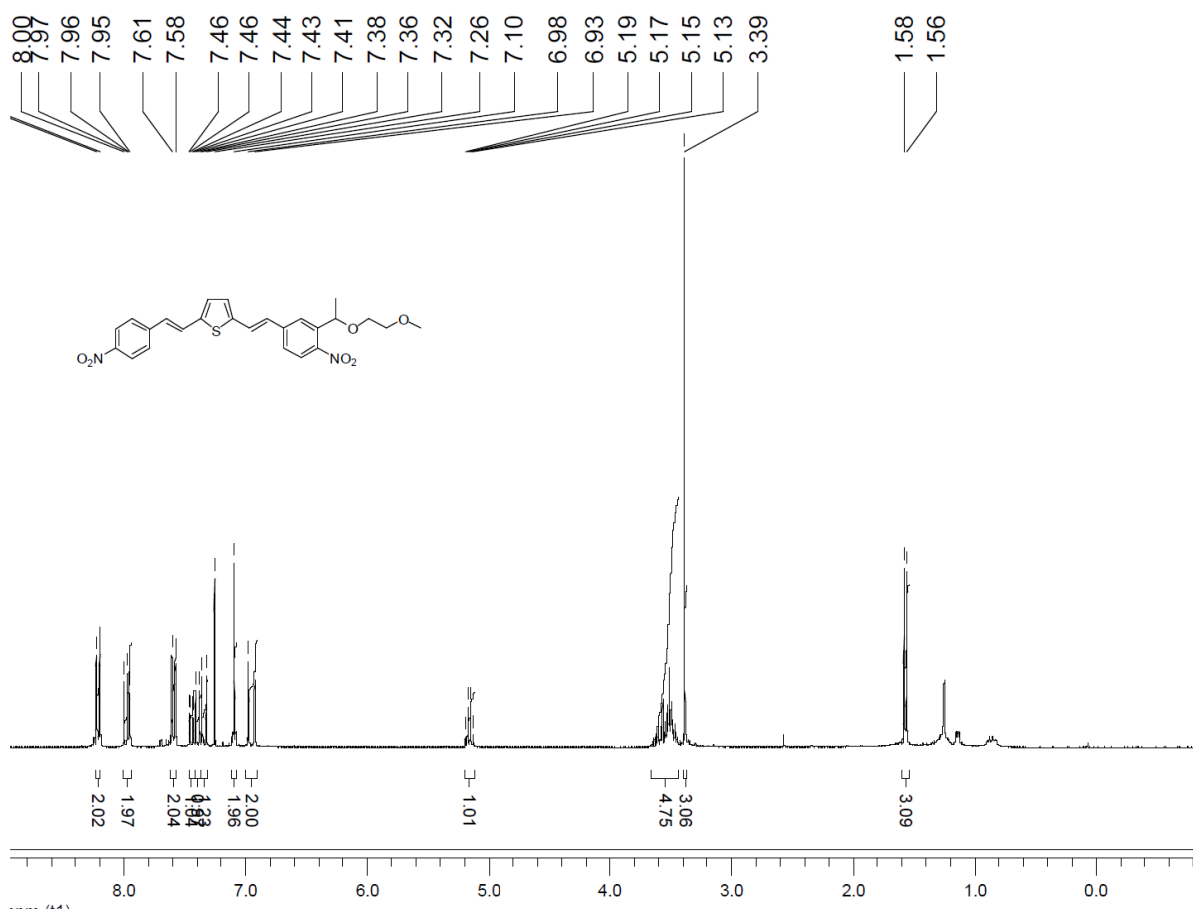

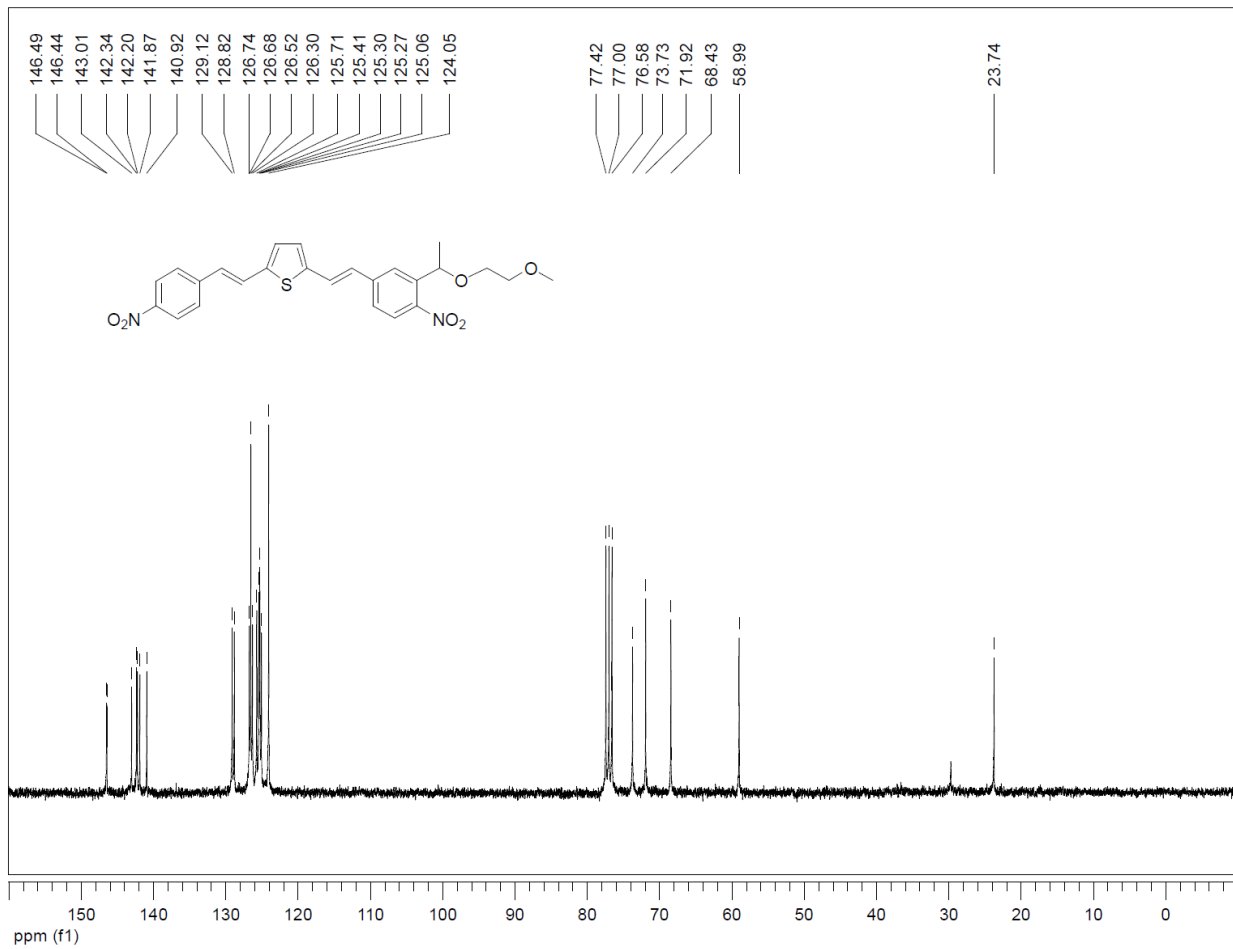



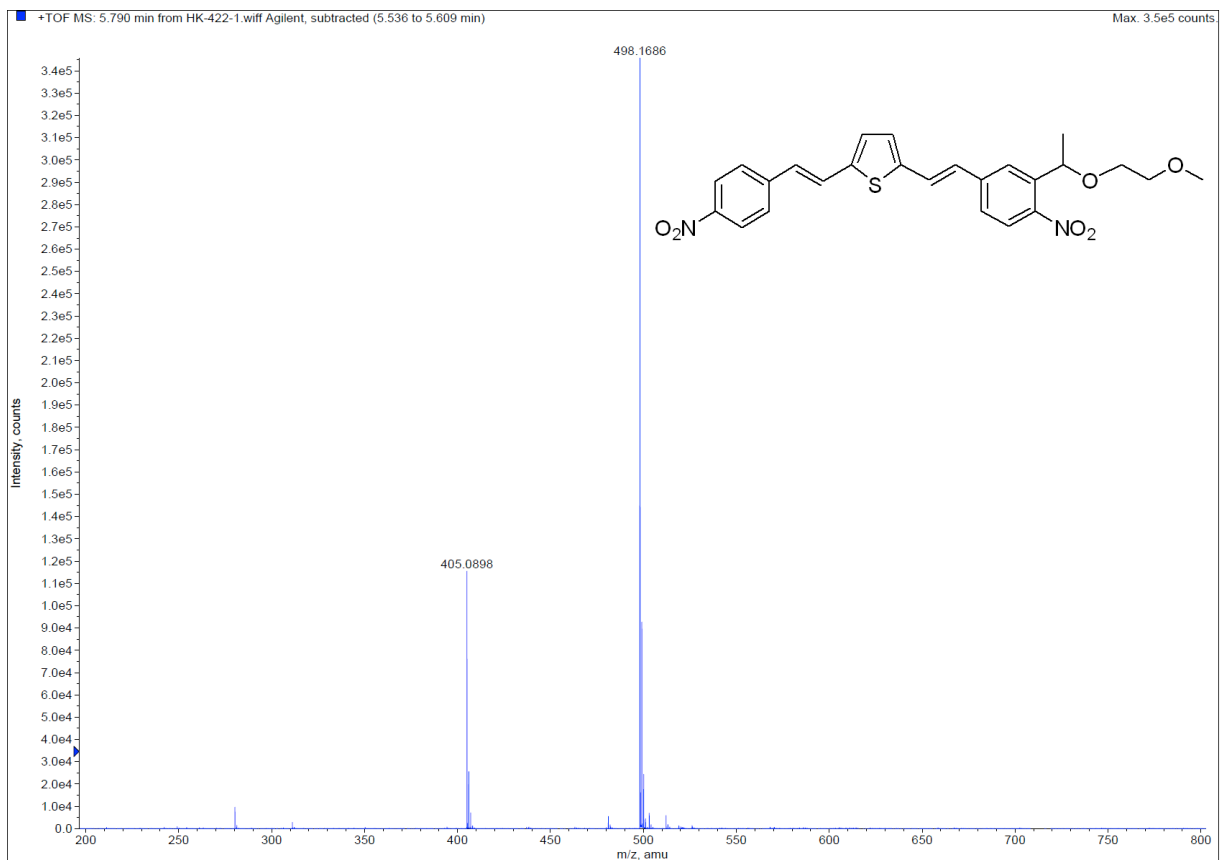

Supplement: NIHMS777271-supplement-Supplement.pdf [file NIHMS777271-supplement-Supplement.pdf]
